# Supplementary material for: Photochemical intramolecular cyclization of o-alkynylaryl isocyanides with organic dichalcogenides leading to 2,4-bischalcogenated quinolines
Source: Royal Society of Chemistry journal article supplement (doi:10.1039/c0ob01168a), 2011-01-01

*Supplementary Information for*

**Photochemical Intramolecular Cyclization of *o*-Alkynylaryl Isocyanides  
with Organic Dichalcogenides  
Leading to 2,4-Bischalcogenated Quinoline Derivatives**

*Takenori Mitamura, Kimiyo Iwata, Akihiro Nomoto, and Akiya Ogawa\**

*Department of Applied Chemistry, Graduate School of Engineering, Osaka Prefecture University,  
1-1 Gakuen-cho, Nakaku, Sakai, Osaka 599-8531, Japan*

**Contents**

**General Remarks (PS2)**

**Tables (PS3–S4)**

**UV-Vis Spectra of *o*-Alkynylaryl Isocyanide (PS5)**

**Characterization Data (PS6–S8)**

**References and Notes for Supplementary Information (PS9)**

**<sup>1</sup>H and <sup>13</sup>C NMR Spectra (PS10–S57)**

## General Remarks.

$^1\text{H}$  NMR spectra were recorded on a spectrometer (300 MHz or 400 MHz) using  $\text{CDCl}_3$  as the solvent with tetramethylsilane (TMS) as the internal standard.  $^{13}\text{C}$  NMR spectra were obtained on a spectrometer (75 MHz or 100 MHz) using  $\text{CDCl}_3$  as the solvent. Chemical shifts in  $^{13}\text{C}$  NMR were measured relative to  $\text{CDCl}_3$  by using  $\delta$  77.0 ppm. Infrared spectra were determined on a FT-IR spectrometer. Melting points were determined on a micro melting point apparatus. Conventional mass spectra were recorded with a gas chromatograph mass spectrometer. High resolution mass spectra were obtained on a mass spectrometer. Terminal acetylenes (4-methylphenylacetylene,<sup>S1</sup> 4-methoxyphenylacetylene,<sup>S1</sup> 4-chlorophenylacetylene,<sup>S1</sup> 4-nitrophenylacetylene,<sup>S2</sup> and 4-cyanophenylacetylene<sup>S2</sup>), organic dichalcogenides (diphenyl diselenide (**4a**),<sup>S3</sup> bis(4-methylphenyl) diselenide (**4b**),<sup>S3</sup> bis(4-methoxyphenyl) diselenide (**4c**),<sup>S3</sup> bis(4-fluorophenyl) diselenide (**4e**),<sup>S3</sup> diphenyl ditelluride (**6a**),<sup>S4</sup> bis(4-methoxyphenyl) ditelluride (**6b**),<sup>S5</sup> bis(4-fluorophenyl) ditelluride (**6c**),<sup>S6</sup> and dibutyl ditelluride (**6d**)<sup>S7</sup>), and *o*-alkynylaryl isocyanides<sup>S8</sup> were prepared according to the literature. The formation of *o*-alkynylaryl isocyanides was determined by  $^1\text{H}$  NMR with 1,3,5-trioxane as the internal standard because of their instability. Other reagents could be purchased commercially and used without further purification.

**Table S1.** Photochemical Reaction of Several Isocyanides **1** with Cyclohexanethiol<sup>a</sup>

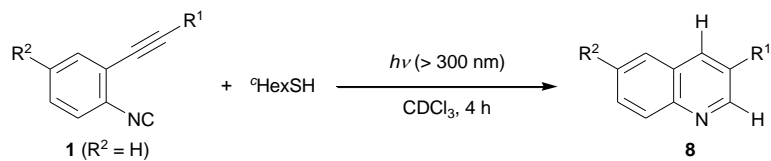

| entry | <b>1</b>  | R <sup>1</sup>                       | <b>8</b>  | yield (%) <sup>b</sup> |
|-------|-----------|--------------------------------------|-----------|------------------------|
| 1     | <b>1a</b> | C <sub>6</sub> H <sub>5</sub> -      | <b>8a</b> | 82                     |
| 2     | <b>1b</b> | 4-Me-C <sub>6</sub> H <sub>4</sub> - | <b>8b</b> | 66                     |
| 3     | <b>1d</b> | 4-Cl-C <sub>6</sub> H <sub>4</sub> - | <b>8d</b> | 67                     |
| 4     | <b>1e</b> | 4-F-C <sub>6</sub> H <sub>4</sub> -  | <b>8e</b> | 75                     |
| 5     | <b>1f</b> | <i>n</i> -Bu-                        | <b>8f</b> | 72                     |
| 6     | <b>1g</b> | 1-cyclohexenyl-                      | <b>8g</b> | 64                     |

<sup>a</sup> Reaction conditions: isocyanide (**1**, 0.10 mmol), thiol (0.20 mmol), CDCl<sub>3</sub> (0.50 mL), room temperature, *hν* (> 300 nm: irradiation with a high pressure Hg lamp through Pyrex). <sup>b</sup> Isolated yield.

**Table S2.** Optimization of the Synthesis of 2-Sulfanylquinoline **9a**<sup>a</sup>

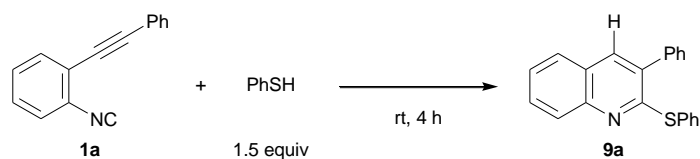

| entry | solvent           | additive                       | yield of <b>9a</b> (%) <sup>b</sup> |
|-------|-------------------|--------------------------------|-------------------------------------|
| 1     | CHCl <sub>3</sub> | —                              | 29                                  |
| 2     | CHCl <sub>3</sub> | Et <sub>3</sub> N              | 70                                  |
| 3     | THF               | Et <sub>3</sub> N              | 85 (78)                             |
| 4     | CHCl <sub>3</sub> | K <sub>2</sub> CO <sub>3</sub> | 11                                  |

<sup>a</sup> Reaction conditions: isocyanide (**1a**, 0.05 mmol), benzenethiol, solvent (0.5 mL), room temperature, 4 h. <sup>b</sup> Determined by <sup>1</sup>H NMR. A value in parenthesis is isolated yield.

**Table S3.** Scope and Limitation of Several Isocyanides **1**<sup>a</sup>

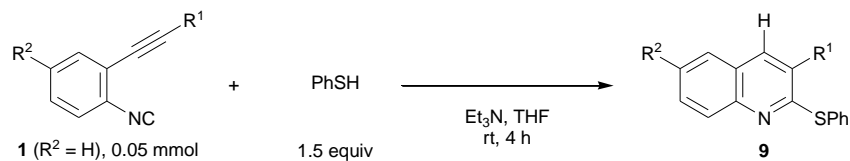

| entry | R <sup>1</sup>                                    | <b>1</b>  | product | <b>9</b>  | yield (%) <sup>b</sup> |
|-------|---------------------------------------------------|-----------|---------|-----------|------------------------|
| 1     | C <sub>6</sub> H <sub>5</sub> -                   | <b>1a</b> |         | <b>9a</b> | 78                     |
| 2     | 4-Me-C <sub>6</sub> H <sub>4</sub> -              | <b>1b</b> |         | <b>9b</b> | 57                     |
| 3     | 4-Cl-C <sub>6</sub> H <sub>4</sub> -              | <b>1d</b> |         | <b>9d</b> | 73                     |
| 4     | 4-F-C <sub>6</sub> H <sub>4</sub> -               | <b>1e</b> |         | <b>9e</b> | 80                     |
| 5     | CH <sub>3</sub> (CH <sub>2</sub> ) <sub>3</sub> - | <b>1f</b> |         | <b>9f</b> | 64                     |

<sup>a</sup> Reaction conditions: isocyanide (**1**, 0.05 mmol), benzenethiol (0.075 mmol), THF (0.5 mL), Et<sub>3</sub>N (0.5 mL), room temperature, 4 h. <sup>b</sup> Isolated yield.

## UV-Vis Spectra of *o*-Alkynylaryl Isocyanides **1a** and **1f**

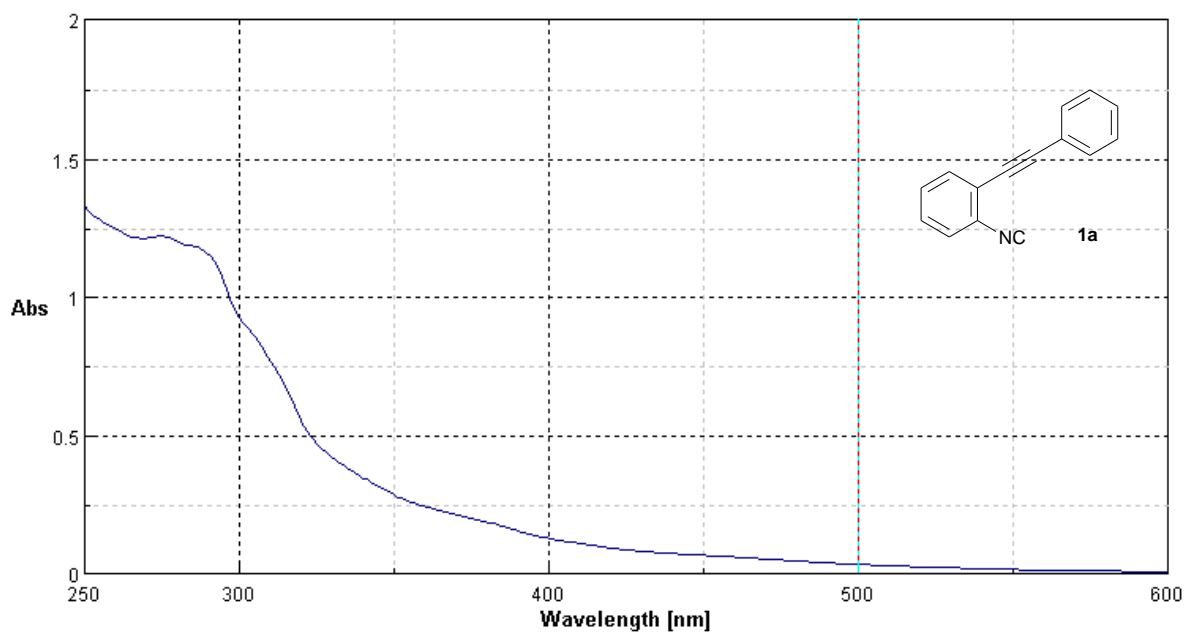

**Figure S1.** UV-Vis Spectrum of *o*-Alkynylaryl Isocyanide **1a** ( $1.2 \times 10^{-5}$  M in  $\text{CHCl}_3$ ).

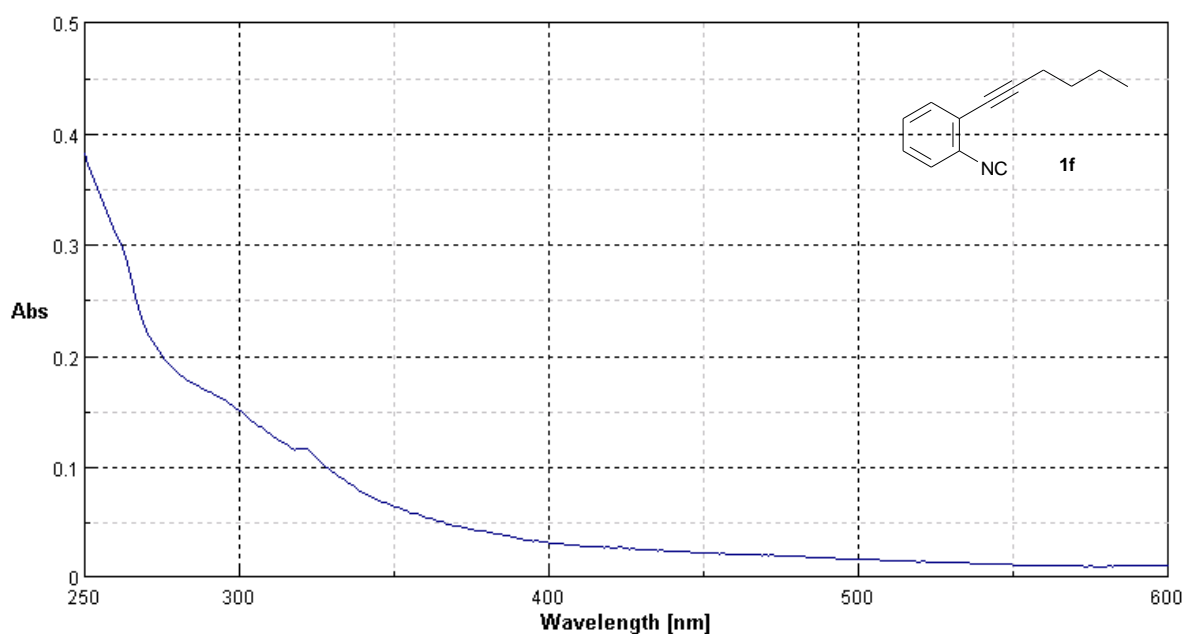

**Figure S2.** UV-Vis Spectrum of *o*-Alkynylaryl Isocyanide **1f** ( $4.7 \times 10^{-6}$  M in  $\text{CHCl}_3$ ).

## Characterization Data.

**3-(4-Methylphenyl)quinoline (8b):**<sup>S9</sup> Quinoline **8b** (14.5 mg, 0.066 mmol, 66%) was obtained from **1b** (0.10 mmol) according to the general procedure. The crude mixture was purified by PTLC on silica gel (Hex:AcOEt = 9:1) and recycle GPC (CHCl<sub>3</sub>). Slightly yellow oil; <sup>1</sup>H NMR (300 MHz, CDCl<sub>3</sub>, ppm) δ 2.44 (s, 3H), 7.34 (d, *J* = 7.5 Hz, 2H), 7.57–7.64 (m, 3H), 7.71 (ddd, *J* = 1.5, 6.9, 8.4 Hz, 1H), 7.87 (d, *J* = 8.4 Hz, 1H), 8.13 (d, *J* = 8.4 Hz, 1H), 8.28 (d, *J* = 2.1 Hz, 1H), 9.18 (d, *J* = 2.1 Hz, 1H); <sup>13</sup>C NMR (75 MHz, CDCl<sub>3</sub>, ppm) δ 21.2, 126.9, 127.2, 127.9, 128.1, 129.2, 129.7, 129.9, 132.8, 133.8, 135.0, 138.0, 147.2, 149.9; IR (NaCl, cm<sup>-1</sup>) 3026, 2957, 2922, 2866, 1516, 1493, 1462, 1362, 1340, 1188, 1124, 1040, 1020, 953, 908, 816, 785, 750, 718; MS (FAB) *m/z* 220 ([M+H]<sup>+</sup>, 100).

**3-(4-Chlorophenyl)quinoline (8d):**<sup>S10</sup> Quinoline **8d** (16.1 mg, 0.067 mmol, 67%) was obtained from **1d** (0.10 mmol) according to the general procedure. The crude mixture was purified by PTLC on silica gel (Hex:AcOEt = 9:1) and recycle GPC (CHCl<sub>3</sub>). White solid; mp 130–132 °C (crystallized from acetone); <sup>1</sup>H NMR (400MHz, CDCl<sub>3</sub>, ppm) δ 7.50 (d, *J* = 8.6 Hz, 2H), 7.60 (ddd, *J* = 1.4, 6.9, 7.8 Hz, 1H), 7.65 (d, *J* = 8.6 Hz, 2H), 7.75 (ddd, *J* = 1.4, 6.9, 8.2 Hz, 1H), 7.89 (d, *J* = 7.8 Hz, 1H), 8.16 (d, *J* = 8.2 Hz, 1H), 8.30 (d, *J* = 1.8 Hz, 1H), 9.14 (s, 1H); <sup>13</sup>C NMR (100 MHz, CDCl<sub>3</sub>, ppm) δ 127.2, 128.0, 128.6, 129.1, 129.4, 129.7, 132.6, 133.3, 134.4, 136.2, 139.9, 147.1, 149.2; MS (EI) *m/z* 239 (M<sup>+</sup>, 100).

**3-(4-Fluorophenyl)quinoline (8e):**<sup>S11</sup> Quinoline **8e** (16.7 mg, 0.075 mmol, 75%) was obtained from **1e** (0.10 mmol) according to the general procedure. The crude mixture was purified by PTLC on silica gel (Hex:AcOEt = 9:1) and recycle GPC (CHCl<sub>3</sub>). White solid; mp 100–102 °C (crystallized form acetone); <sup>1</sup>H NMR (300 MHz, CDCl<sub>3</sub>, ppm) δ 7.22 (t, *J* = 8.6 Hz, 2H), 7.59 (dt, *J* = 1.0, 7.5 Hz, 1H), 7.65–7.78 (m, 3H), 7.88 (d, *J* = 7.9 Hz, 1H), 8.14 (d, *J* = 8.4 Hz, 1H), 8.27 (s, 1H), 9.14 (s, 1H); <sup>13</sup>C NMR (100 MHz, CDCl<sub>3</sub>, ppm) δ 116.2 (d, *J*<sub>CF</sub> = 21.0 Hz), 127.2, 127.9, 127.9, 129.0, 129.0 (d, *J*<sub>CF</sub> = 7.6 Hz), 129.6, 132.9, 133.3, 133.8 (d, *J*<sub>CF</sub> = 3.8 Hz), 146.9, 149.3, 162.9 (d, *J*<sub>CF</sub> = 245.8 Hz); IR (NaCl, cm<sup>-1</sup>) 3076, 3052, 1508, 1497, 1231, 953, 905, 831, 785, 746; MS (EI) *m/z* 223 (M<sup>+</sup>, 100).

**3-*n*-Butylquinoline (8f):**<sup>S12</sup> Quinoline **8f** (13.4 mg, 0.072 mmol, 72%) was obtained from **1f** (0.10 mmol) according to the general procedure. The crude mixture was purified by PTLC on silica gel (Hex:AcOEt = 9:1) and recycle GPC (CHCl<sub>3</sub>). Colorless oil; <sup>1</sup>H NMR (300 MHz, CDCl<sub>3</sub>, ppm) δ 0.96 (t, *J* = 7.1 Hz, 3H), 1.33–1.50 (m, 2H), 1.61–1.82 (m, 2H), 2.81 (hep, *J* = 7.8 Hz, 2H), 7.52 (t, *J* = 8.4 Hz, 1H), 7.65 (t, *J* = 8.4 Hz, 1H), 7.77 (d, *J* = 8.4 Hz, 1H), 7.91 (s, 1H), 8.07 (d, *J* = 8.4 Hz, 1H), 8.79 (s, 1H); <sup>13</sup>C NMR (75 MHz, CDCl<sub>3</sub>, ppm) δ 13.9, 22.3, 32.9, 33.3, 126.5, 127.3, 128.2, 128.4, 129.1, 134.1, 135.3, 146.7, 152.1; HRMS (FAB) calcd for C<sub>13</sub>H<sub>16</sub>N [M+H]<sup>+</sup> 186.1283, found 186.1279.

**3-(1-Cyclohexenyl)quinoline (8g):**<sup>S13</sup> Quinoline **8g** (13.3 mg, 0.064 mmol, 64%) was obtained from **1g** (0.10 mmol) according to the general procedure. The crude mixture was purified by PTLC on silica gel (Hex:AcOEt = 9:1) and recycle GPC (CHCl<sub>3</sub>). Pale yellow oil; <sup>1</sup>H NMR

(300 MHz, CDCl<sub>3</sub>, ppm)  $\delta$  1.63–1.78 (m, 2H), 1.80–1.93 (m, 2H), 2.24–2.35 (m, 2H), 2.46–2.58 (m, 2H), 6.32–6.42 (m, 1H), 7.51 (t,  $J = 8.4$  Hz, 1H), 7.65 (t,  $J = 8.4$  Hz, 1H), 7.79 (d,  $J = 8.4$  Hz, 1H), 8.01 (s, 1H), 8.07 (d,  $J = 8.4$  Hz, 1H), 9.04 (s, 1H); <sup>13</sup>C NMR (75 MHz, CDCl<sub>3</sub>, ppm)  $\delta$  22.0, 22.9, 26.0, 27.1, 126.6, 127.2, 127.9, 128.7, 129.2, 129.9, 130.4, 133.6, 136.6, 146.5, 152.1; IR (NaCl, cm<sup>-1</sup>) 3058, 2934, 2858, 1497, 1331, 1188, 1128, 957, 903, 787, 752; MS (EI)  $m/z$  209 (M<sup>+</sup>, 73).

### General Procedures for the Synthesis of 2-Sulfanylquinolines.

To a solution of 2-(phenylethynyl)phenyl isocyanide (**1a**, 0.05 mmol), benzenethiol (0.075 mmol), and THF (0.5 mL) was added triethylamine (0.5 mL), and the mixture was stirred at room temperature for 4 h. After the reaction was complete, the resulting mixture was concentrated in vacuo, and purified by PTLC on silica gel (Hex; AcOEt = 9:1) and recycle GPC (CHCl<sub>3</sub>) to give 3-phenyl-2-phenylsulfanylquinoline (**9a**, 12.2 mg, 0.039 mmol, 78%) as a colorless oil. Further purification was carried out by recycle GPC (CHCl<sub>3</sub>) for all 2-sulfanylquinolines **9**.

**3-Phenyl-2-phenylsulfanylquinoline (9a):** Colorless oil; <sup>1</sup>H NMR (300 MHz, CDCl<sub>3</sub>, ppm)  $\delta$  7.33–7.62 (m, 12H), 7.69–7.78 (m, 2H), 7.86 (s, 1H); <sup>13</sup>C NMR (75 MHz, CDCl<sub>3</sub>, ppm)  $\delta$  125.8, 126.3, 127.4, 128.3, 128.4, 128.4, 128.7, 128.9, 129.4, 129.6, 130.2, 131.1, 134.9, 135.7, 138.0, 147.3, 158.3; IR (NaCl, cm<sup>-1</sup>) 3057, 3030, 1614, 1592, 1516, 1475, 1439, 1385, 1362, 1337, 1132, 1084, 1024, 966, 910, 781, 748, 700, 689; HRMS (FAB) calcd for C<sub>21</sub>H<sub>16</sub>NS [M+H]<sup>+</sup> 314.1003, found 314.0995.

**3-(4-Methylphenyl)-2-phenylsulfanylquinoline (9b):** Quinoline **9b** (9.3 mg, 0.029 mmol, 57%) was obtained from **1b** (0.10 mmol) according to the general procedure. The crude mixture was purified by PTLC on silica gel (Hex:AcOEt = 9:1) and recycle GPC (CHCl<sub>3</sub>). Slightly yellow oil; <sup>1</sup>H NMR (300 MHz, CDCl<sub>3</sub>, ppm)  $\delta$  2.45 (s, 3H), 7.31 (d,  $J = 7.7$  Hz, 2H), 7.36–7.44 (m, 4H), 7.47 (d,  $J = 8.1$  Hz, 2H), 7.52–7.60 (m, 3H), 7.70–7.76 (m, 2H), 7.84 (s, 1H); <sup>13</sup>C NMR (100 MHz, CDCl<sub>3</sub>, ppm)  $\delta$  21.4, 125.7, 126.3, 127.3, 128.3, 128.3, 128.7, 129.1, 129.2, 129.4, 131.1, 132.4, 134.6, 135.0, 135.6, 138.2, 147.2, 158.4; IR (NaCl, cm<sup>-1</sup>) 3062, 3024, 2920, 2873, 1616, 1591, 1577, 1508, 1475, 1439, 1387, 1362, 1339, 1132, 1082, 1024, 968, 818, 748, 689; HRMS (FAB) calcd for C<sub>22</sub>H<sub>18</sub>NS [M+H]<sup>+</sup> 328.1160, found 328.1168.

**3-(4-Chlorophenyl)-2-phenylsulfanylquinoline (9d):** Quinoline **9d** (12.7 mg, 0.037 mmol, 73%) was obtained from **1d** (0.10 mmol) according to the general procedure. The crude mixture was purified by PTLC on silica gel (Hex:AcOEt = 9:1) and recycle GPC (CHCl<sub>3</sub>). Colorless oil; <sup>1</sup>H NMR (400 MHz, CDCl<sub>3</sub>, ppm)  $\delta$  7.37–7.4 (m, 3H), 7.42–7.49 (m, 4H), 7.50–7.55 (m, 2H), 7.59 (ddd,  $J = 1.4, 6.8, 8.3$  Hz, 1H), 7.71–7.78 (m, 2H), 7.84 (s, 1H); <sup>13</sup>C NMR (100 MHz, CDCl<sub>3</sub>, ppm)  $\delta$  126.0, 126.2, 127.4, 128.3, 128.4, 128.6, 128.8, 129.7, 130.8, 130.9, 133.5, 134.4, 134.8, 136.0, 136.3, 147.2, 158.0; IR (NaCl, cm<sup>-1</sup>) 3057, 1616, 1583, 1558, 1491, 1475, 1387, 1360, 1339, 1134, 1096, 1082, 1016, 968, 829, 748, 689; HRMS (FAB) calcd for C<sub>21</sub>H<sub>14</sub>ClNS [M]<sup>+</sup> 347.0535, found 347.0542.

**3-(4-Fluorophenyl)-2-phenylsulfanylquinoline (9e):** Quinoline **9e** (13.1 mg, 0.040 mmol, 80%) was obtained from **1e** (0.10 mmol) according to the general procedure. The crude mixture was

purified by PTLC on silica gel (Hex:AcOEt = 9:1) and recycle GPC (CHCl<sub>3</sub>). White solid; mp 103–104 °C (crystallized from acetone); <sup>1</sup>H NMR (400 MHz, CDCl<sub>3</sub>, ppm) δ 7.17 (t, *J* = 8.7 Hz, 2H), 7.36–7.40 (m, 3H), 7.44 (ddd, *J* = 1.4, 6.9, 7.3 Hz, 1H), 7.49–7.55 (m, 4H), 7.58 (ddd, *J* = 1.4, 6.9, 7.3 Hz, 1H), 7.71–7.77 (m, 2H), 7.84 (s, 1H); <sup>13</sup>C NMR (100 MHz, CDCl<sub>3</sub>, ppm) δ 115.4 (d, *J*<sub>CF</sub> = 21.0 Hz), 125.9, 126.2, 127.3, 128.3, 128.7, 129.5, 130.8, 131.3 (d, *J*<sub>CF</sub> = 7.6 Hz), 131.9, 133.6, 133.8, 134.8, 135.8, 147.2, 158.1, 162.7 (d, *J*<sub>CF</sub> = 247.7 Hz); IR (NaCl, cm<sup>-1</sup>) 3057, 1593, 1558, 1508, 1475, 1387, 1362, 1339, 1223, 1159, 1134, 1082, 1067, 1016, 968, 835, 748, 689; HRMS (FAB) calcd for C<sub>21</sub>H<sub>15</sub>FNS [M+H]<sup>+</sup> 332.0909, found 332.0905.

**3-*n*-Butyl-2-phenylsulfanylquinoline (9f):** Quinoline **9f** (9.3 mg, 0.032 mmol, 64%) was obtained from **1f** (0.10 mmol) according to the general procedure. The crude mixture was purified by PTLC on silica gel (Hex:AcOEt = 9:1) and recycle GPC (CHCl<sub>3</sub>). Colorless oil; <sup>1</sup>H NMR (300 MHz, CDCl<sub>3</sub>, ppm) δ 1.00 (t, *J* = 7.5 Hz, 3H), 1.48 (sex, *J* = 7.5 Hz, 2H), 1.77 (hep, *J* = 7.5 Hz, 2H), 2.86 (t, *J* = 7.5 Hz, 2H), 7.33–7.45 (m, 4H), 7.51 (ddd, *J* = 1.4, 6.8, 8.4 Hz, 1H), 7.57–7.63 (m, 2H), 7.64–7.74 (m, 2H), 7.78 (s, 1H); <sup>13</sup>C NMR (75 MHz, CDCl<sub>3</sub>, ppm) δ 13.9, 22.6, 31.5, 32.1, 125.5, 126.8, 126.8, 128.2, 128.3, 128.5, 128.8, 131.1, 134.1, 134.2, 134.5, 146.7, 158.8; IR (NaCl, cm<sup>-1</sup>) 3059, 2957, 2930, 2858, 1614, 1595, 1556, 1487, 1477, 1439, 1396, 1331, 1175, 1134, 1042, 1024, 953, 897, 858, 779, 748, 706, 687; HRMS (FAB) calcd for C<sub>19</sub>H<sub>19</sub>NS [M]<sup>+</sup> 293.1238, found 293.1230.



## References and Notes for Supplementary Information

- S1. W. B. Austin, N. Bilow, W. J. Kelleghan, K. S. Y. Lau, *J. Org. Chem.*, 1981, **46**, 2280.
- S2. B. K. Blackburn, A. Lee, M. Baier, B. Kohl, A. G. Olivero, R. Matamoros, K. D. Robarge, R. S. McDowell, *J. Med. Chem.*, 1997, **40**, 717.
- S3. (a) H. J. Reich, J. M. Renga, I. L. Reich, *J. Am. Chem. Soc.*, 1975, **97**, 5434. (b) P. M. Dickson, M. A. D. McGowan, B. Yearwood, M. J. Heeg, J. P. Oliver, *J. Organomet. Chem.*, 1999, **588**, 42.
- S4. Y. Aso, H. Yamashita, T. Otsubo, F. Ogura, *J. Org. Chem.*, 1989, **54**, 5627.
- S5. M. R. Detty, B. J. Murray, D. L. Smith, N. Zumbulyadis, *J. Am. Chem. Soc.*, 1983, **105**, 875.
- S6. D. Crich, C. Chen, J.-T. Hwang, H. Yuan, A. Papadatos, R. I. Walter, *J. Am. Chem. Soc.*, 1994, **116**, 8937.
- S7. L. Engman, M. P. Cava, *Synth. Commun.*, 1982, **12**, 163.
- S8. (a) M. Suginome, T. Fukuda, Y. Ito, *Org. Lett.*, 1999, **1**, 1977. (b) J. D. Rainier, A. R. Kennedy, *J. Org. Chem.*, 2000, **65**, 6213. (c) S. Kamijo, Y. Yamamoto, *J. Am. Chem. Soc.*, 2002, **124**, 11940. (d) X. Lu, J. L. Petersen, K. K. Wang, *Org. Lett.*, 2003, **5**, 3277. (e) T. Mitamura, A. Nomoto, M. Sonoda, A. Ogawa, *Bull. Chem. Soc. Jpn.*, 2010, **83**, 822.
- S9. M. Ishikura, I. Oda, M. Terashima, *Heterocycles*, 1985, **23**, 2375.
- S10. Y. Wang, X. Xin, Y. Liang, Y. Lin, R. Zhang, D. Dong, *Eur. J. Org. Chem.*, 2009, 4165.
- S11. S. E. Denmark, R. C. Smith, W.-T. T. Chang, J. M. Muhuhi, *J. Am. Chem. Soc.*, 2009, **131**, 3104.
- S12. I. Kondolff, H. Doucet, M. Santelli, *Organometallics*, 2006, **25**, 5219.
- S13. L. H. Klemm, D. R. McCoy, C. E. Klopfenstein, *J. Heterocyclic Chem.*, 1971, **8**, 383.



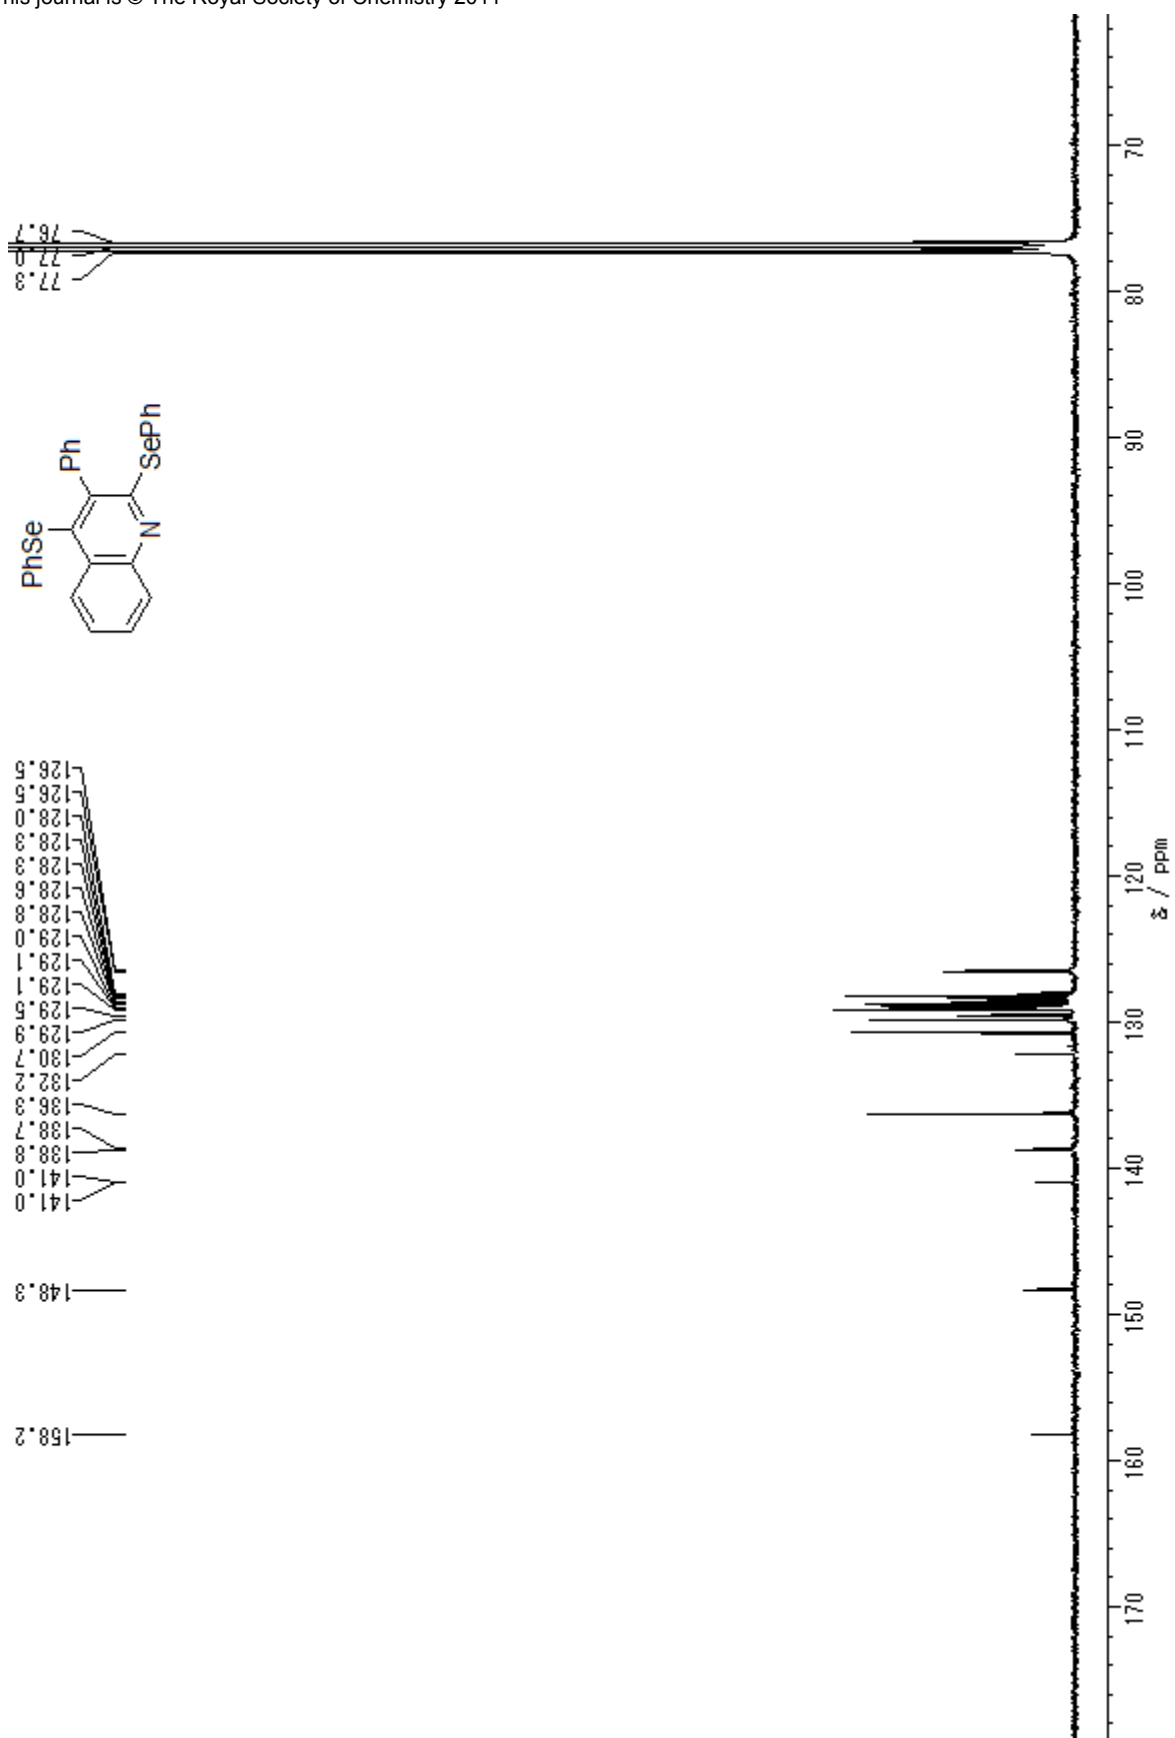



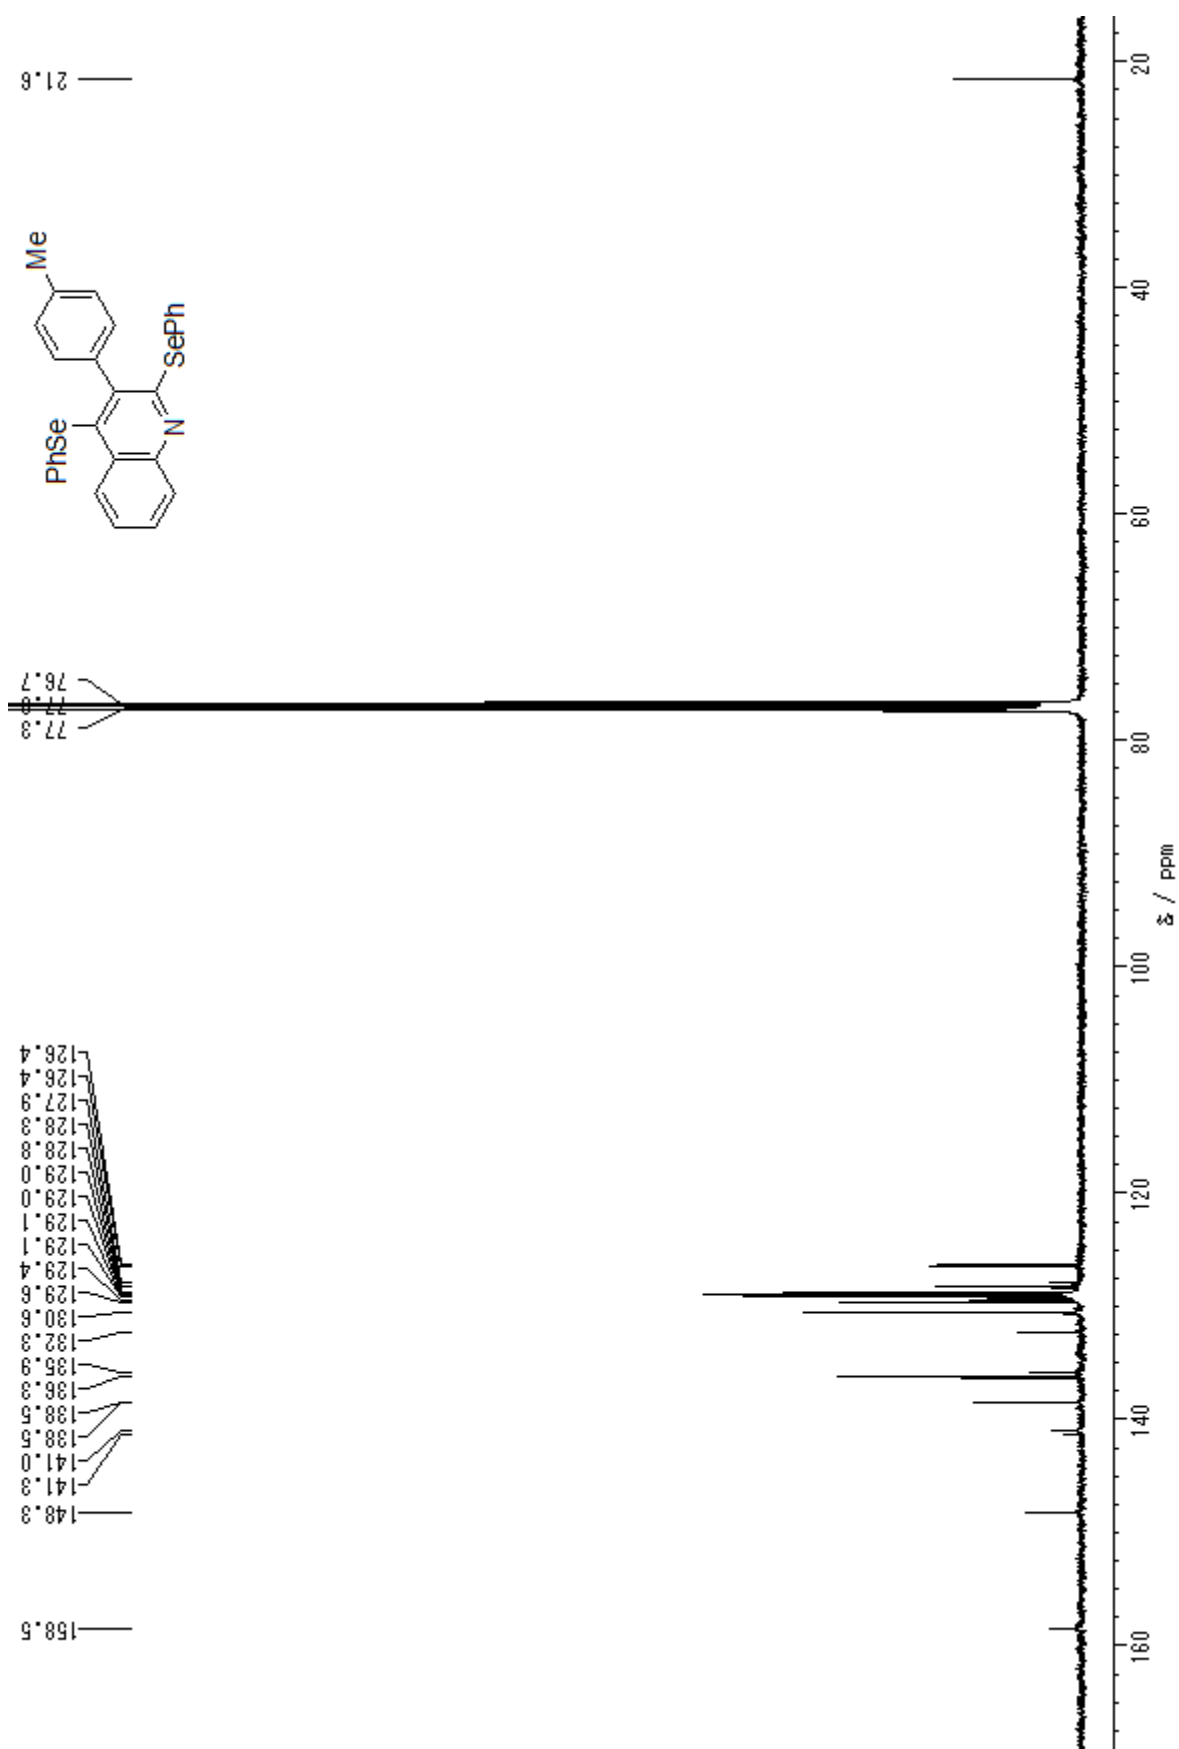

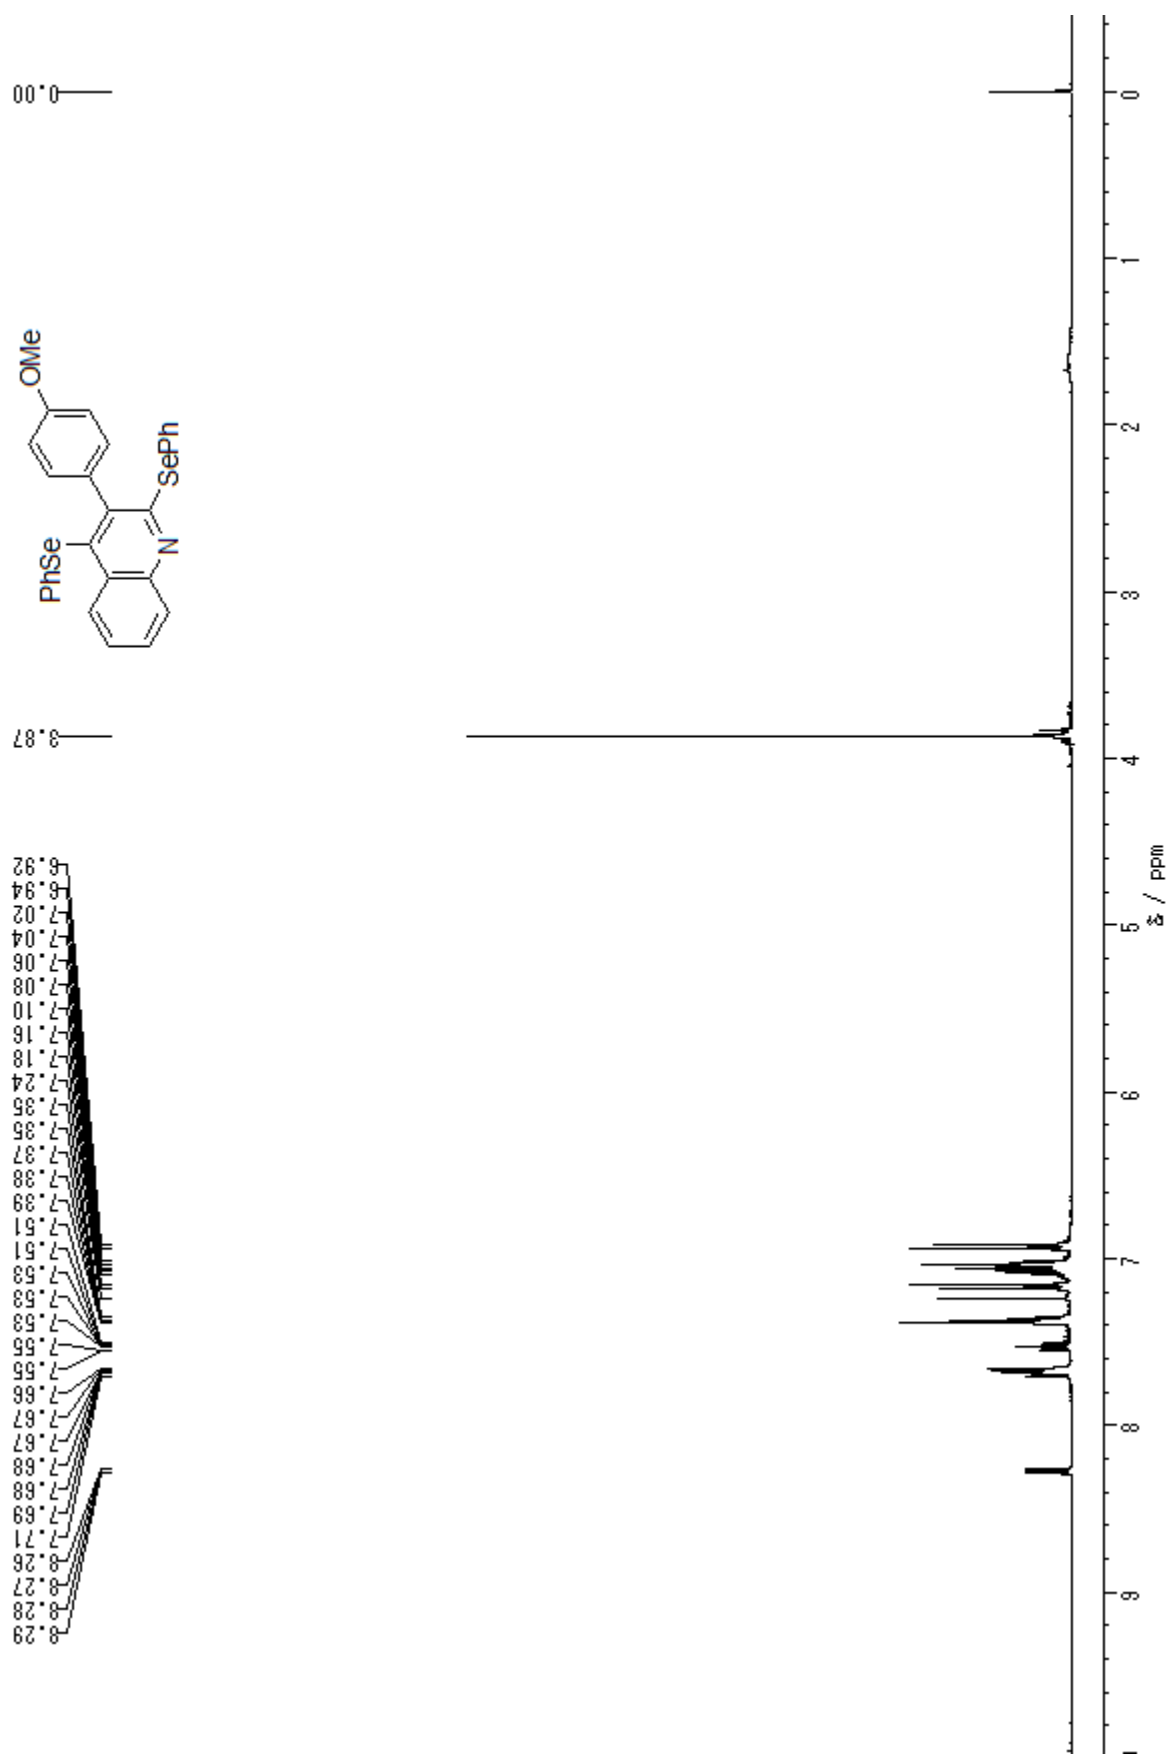

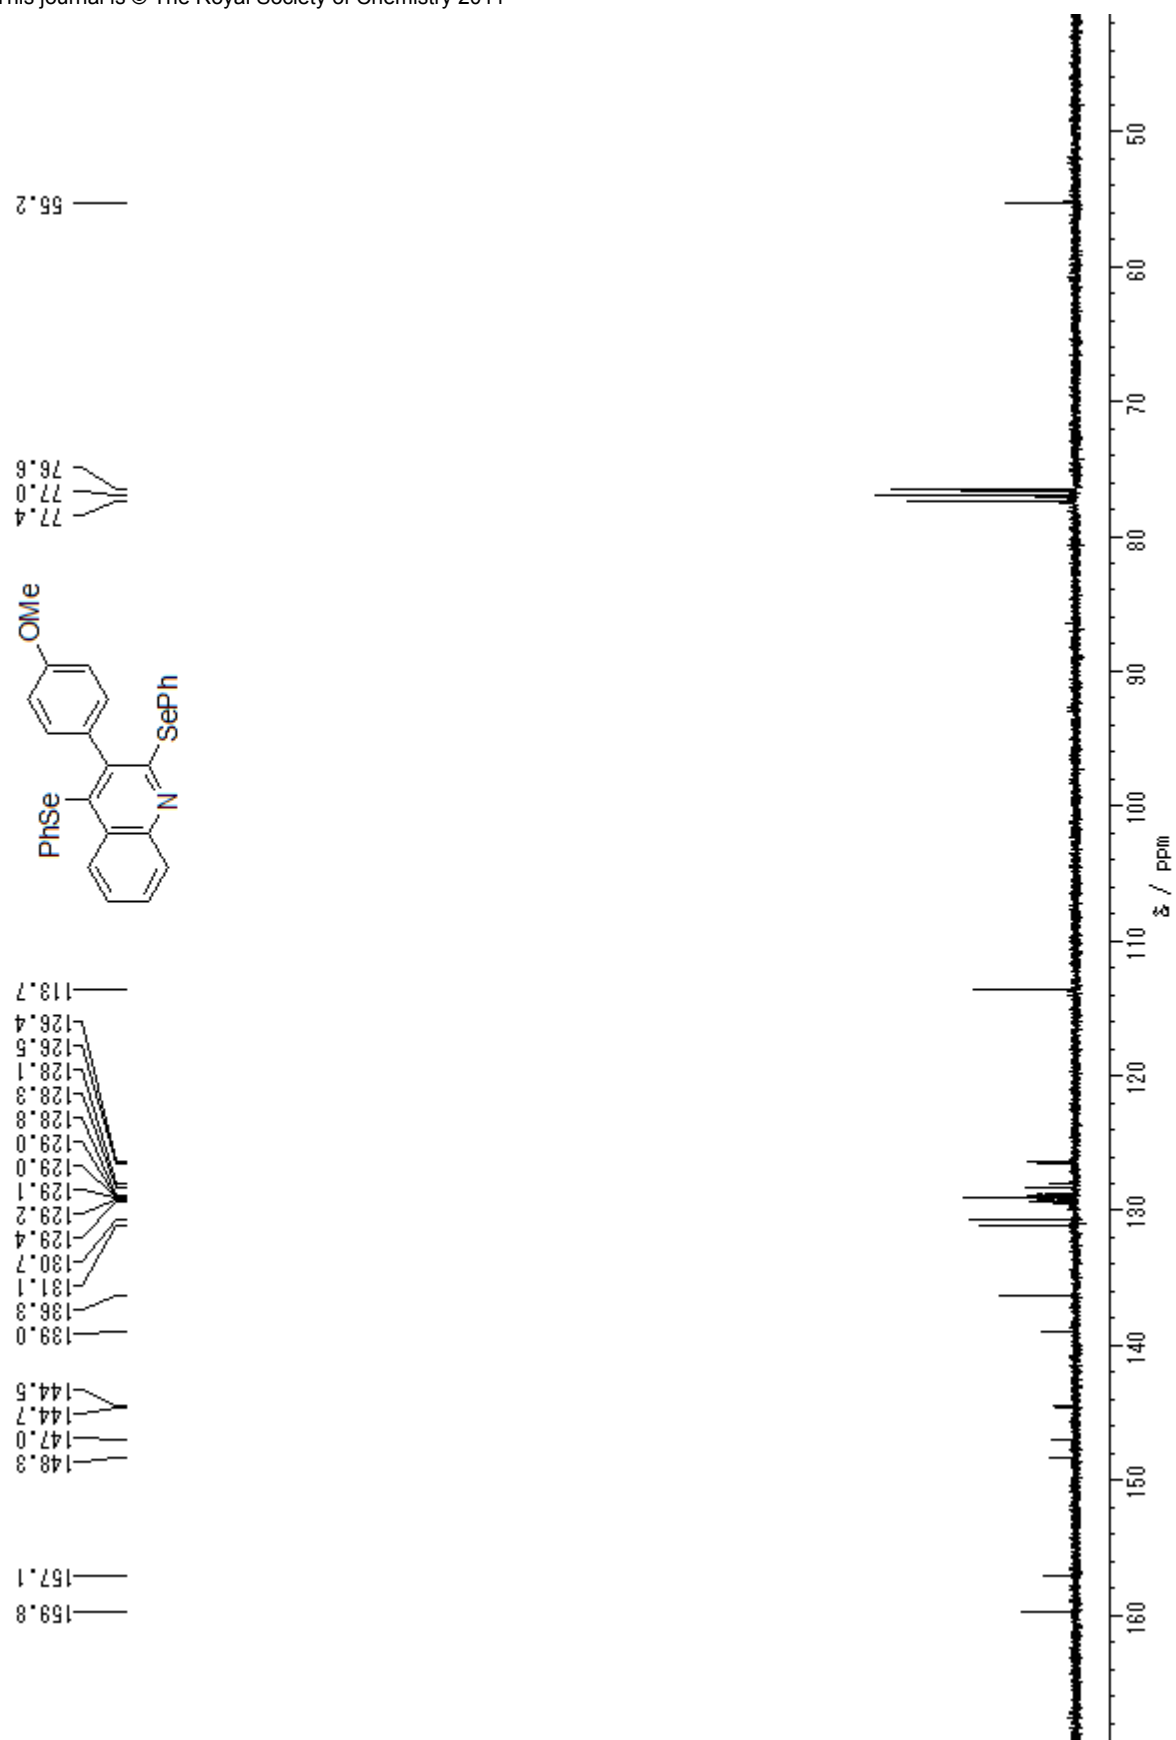

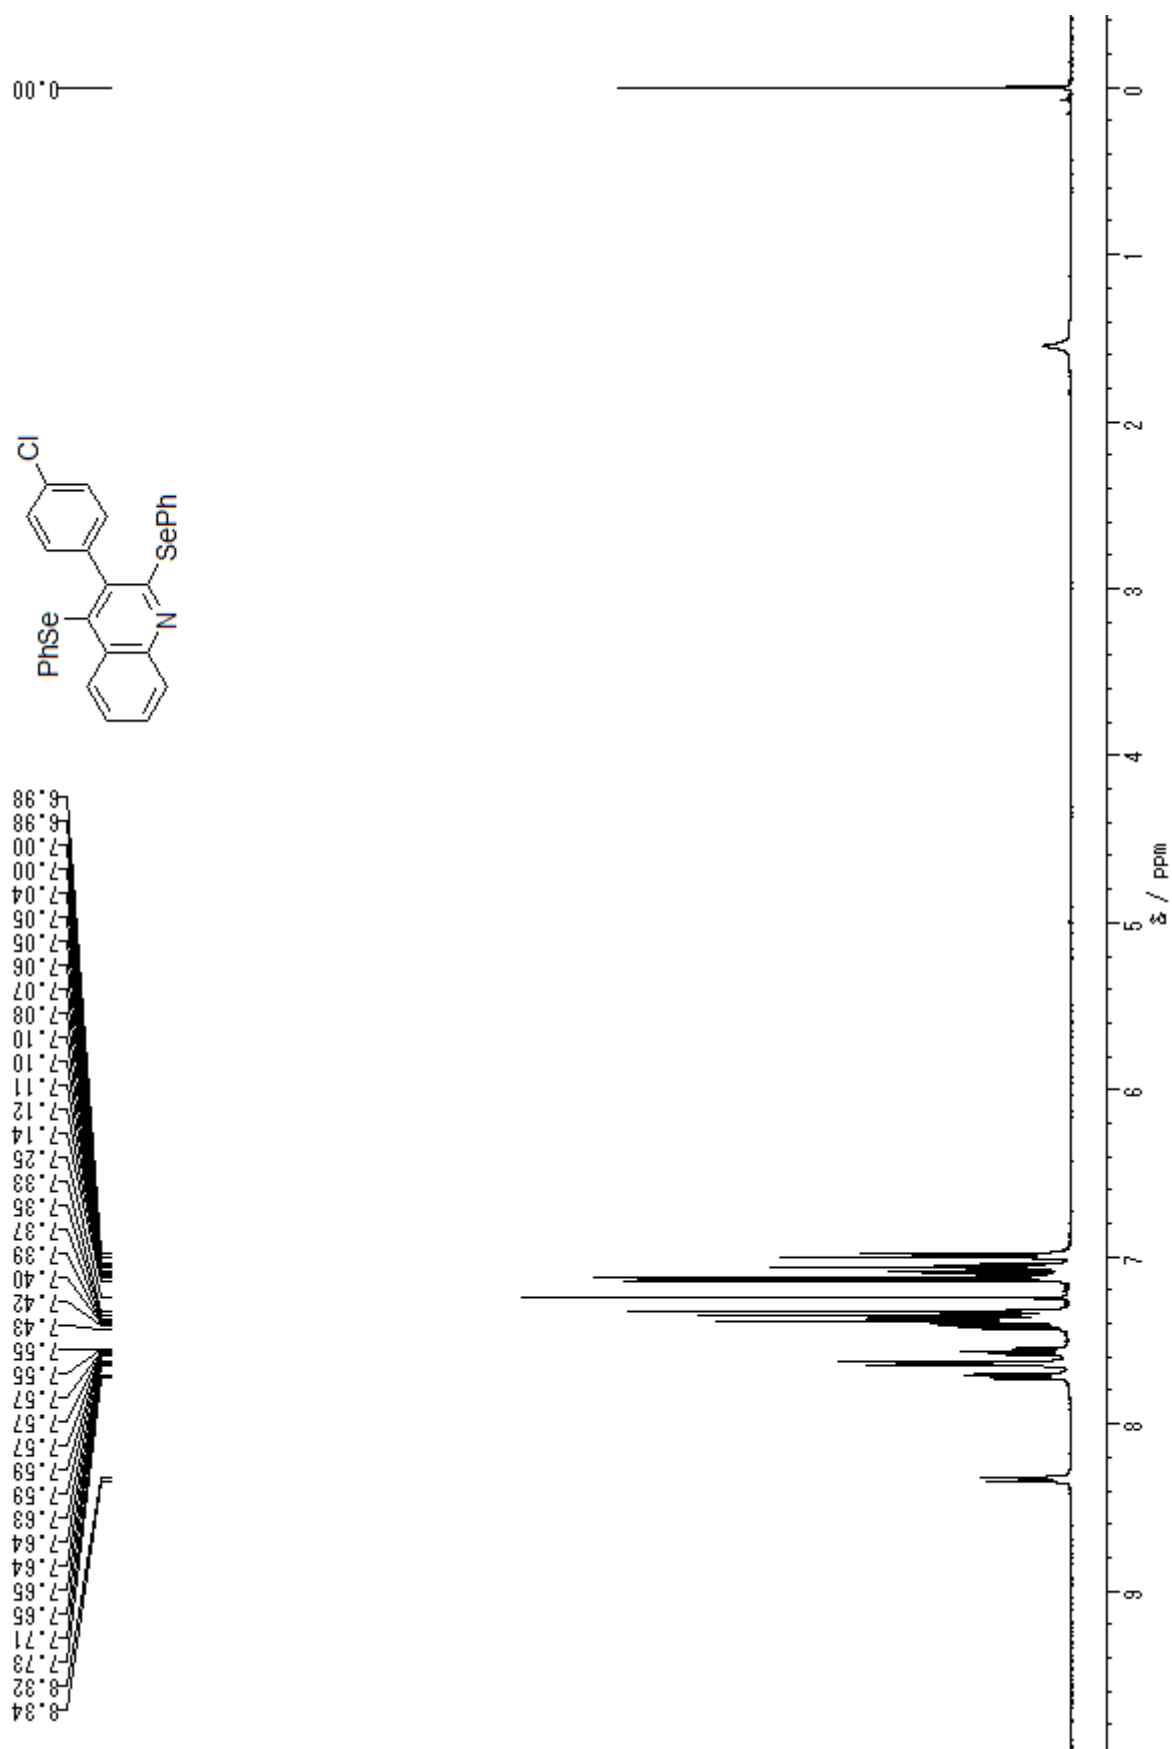



77.4  
77.0  
76.6

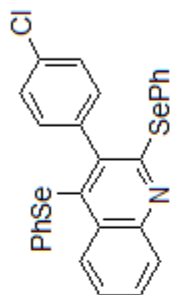

139.7  
139.2  
137.1  
136.3  
134.6  
131.9  
131.3  
131.0  
129.8  
129.2  
129.1  
128.9  
128.9  
128.8  
128.8  
128.5  
128.4  
128.1  
126.7  
126.6

148.4

157.9

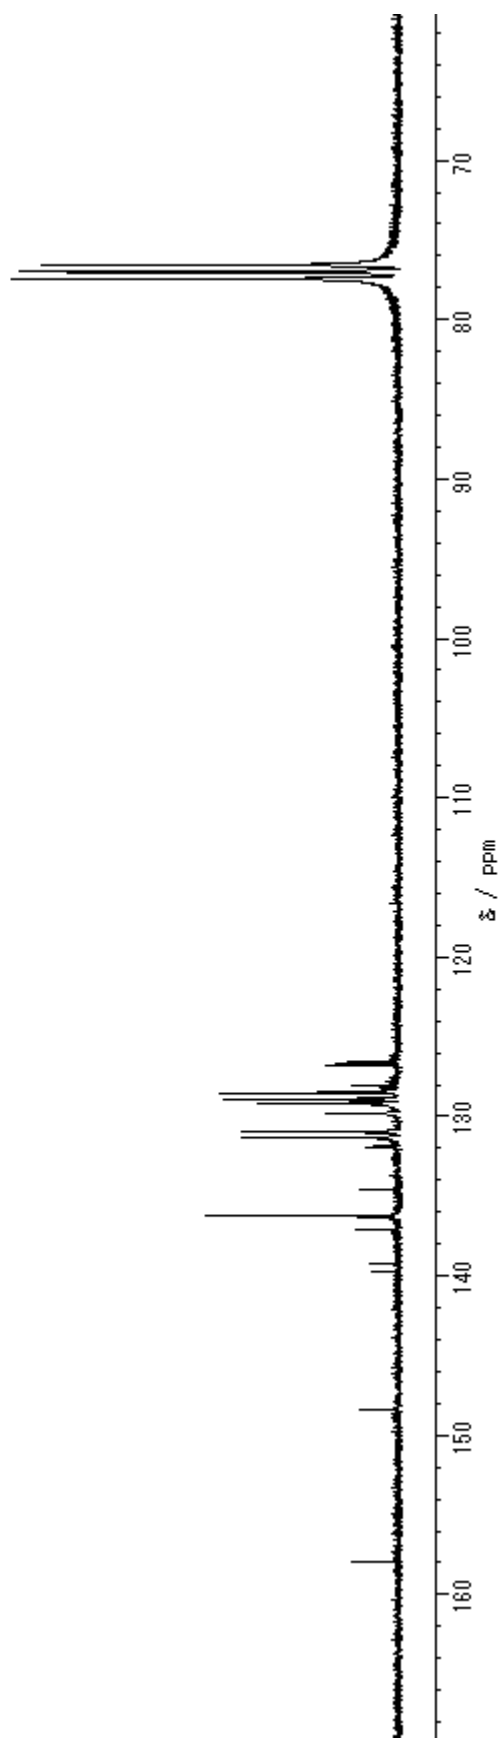



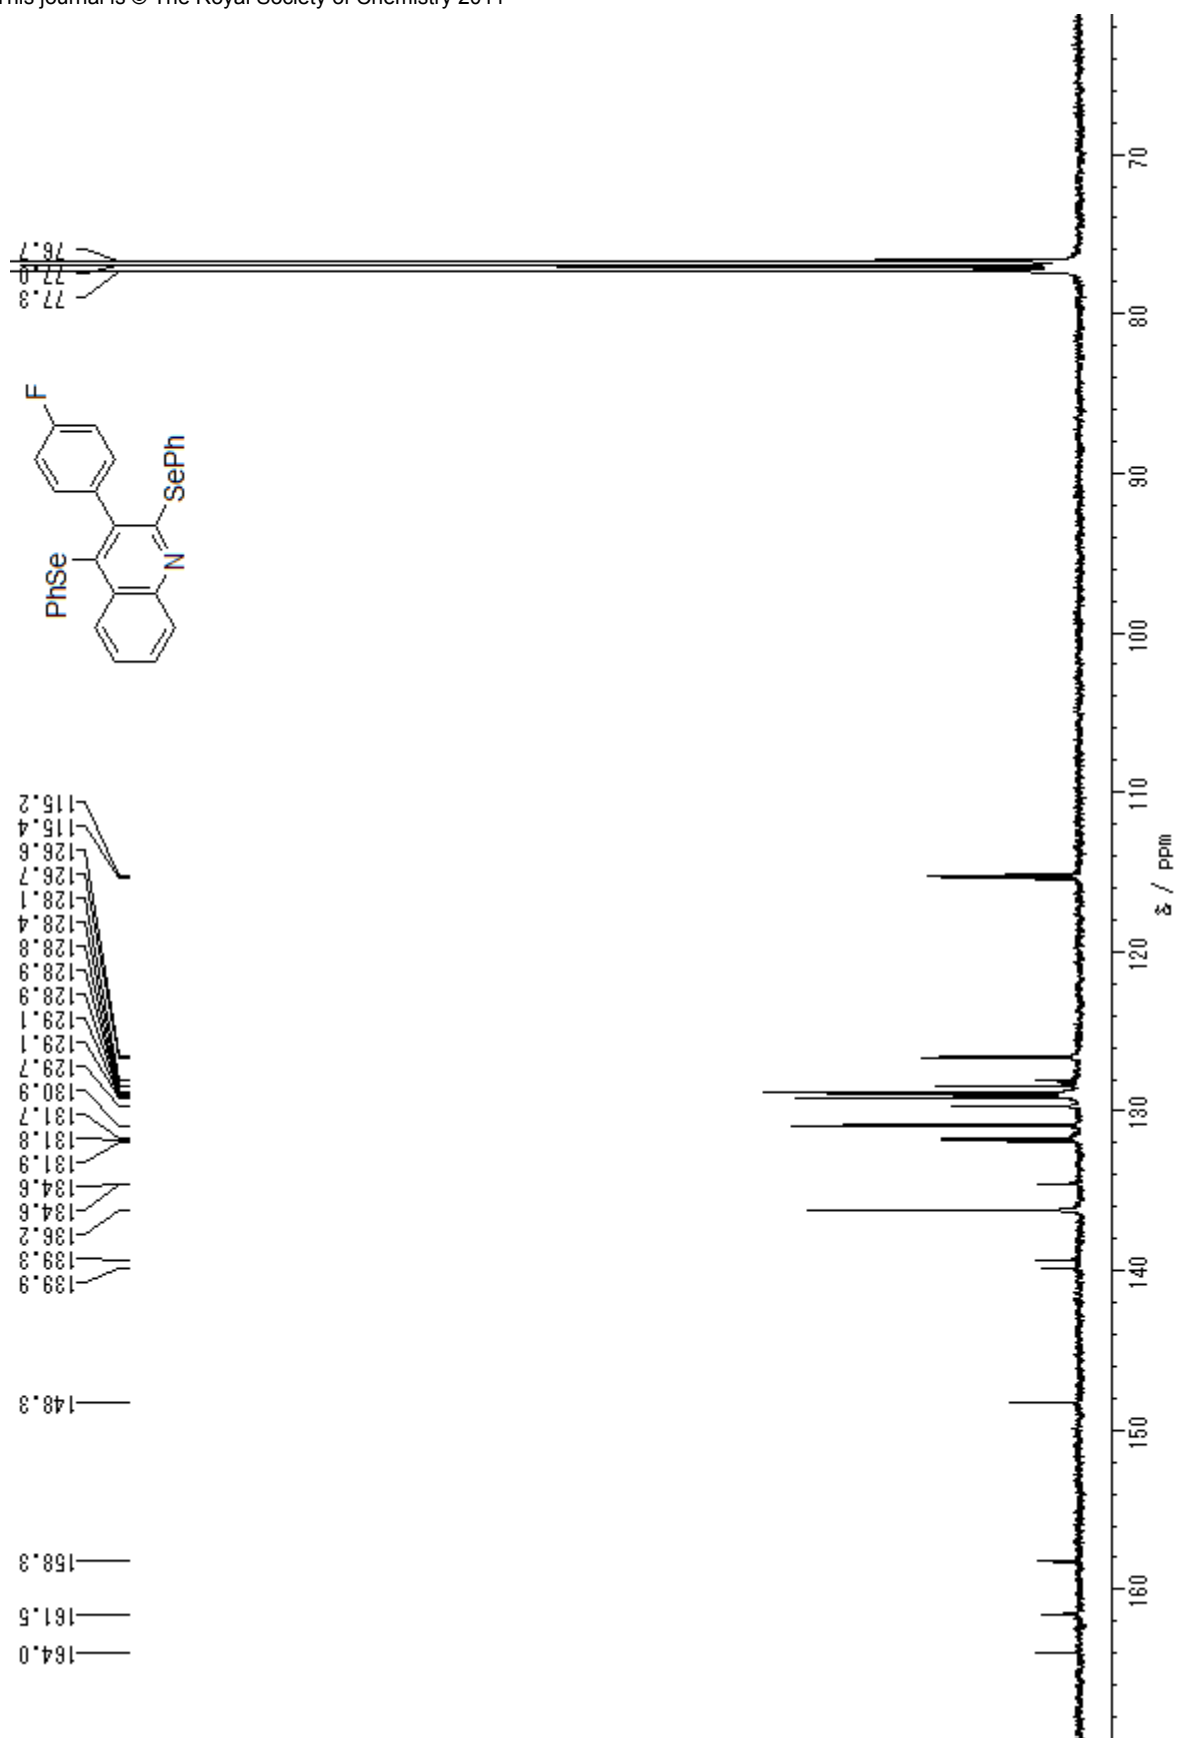

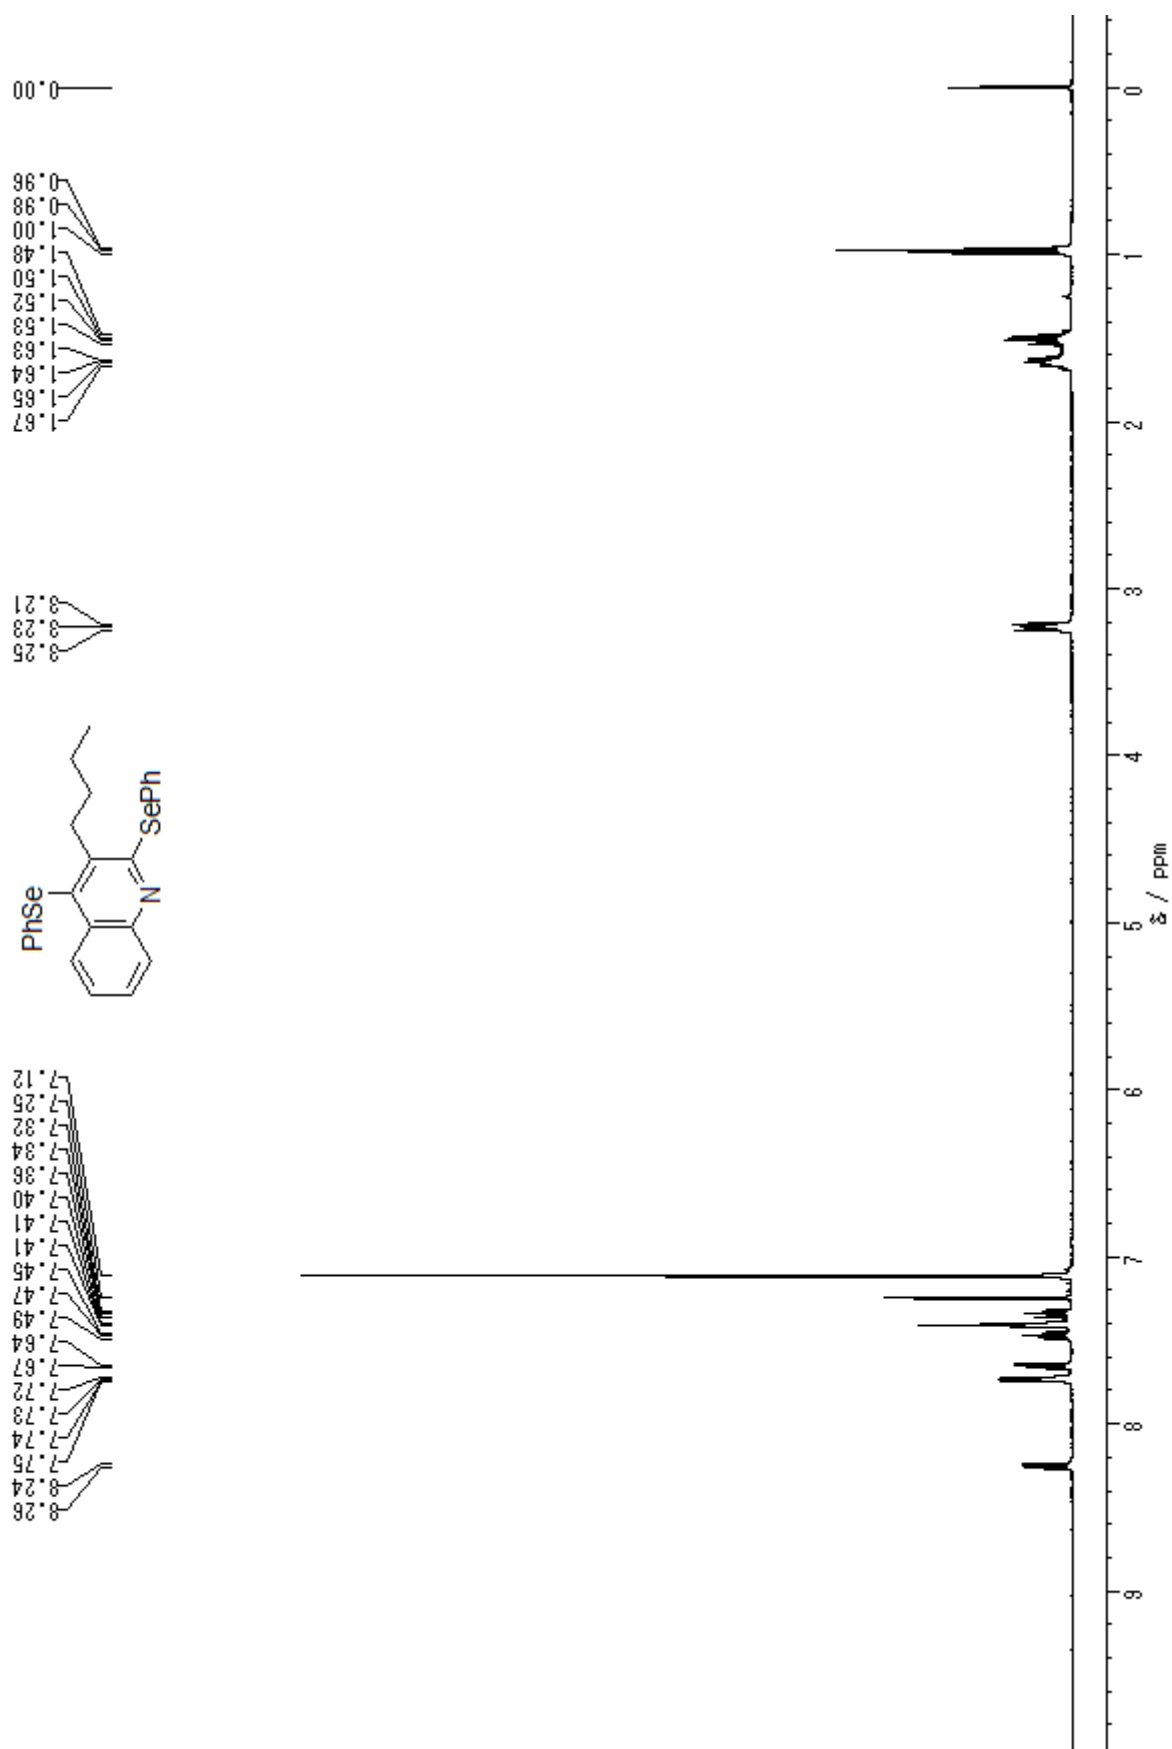

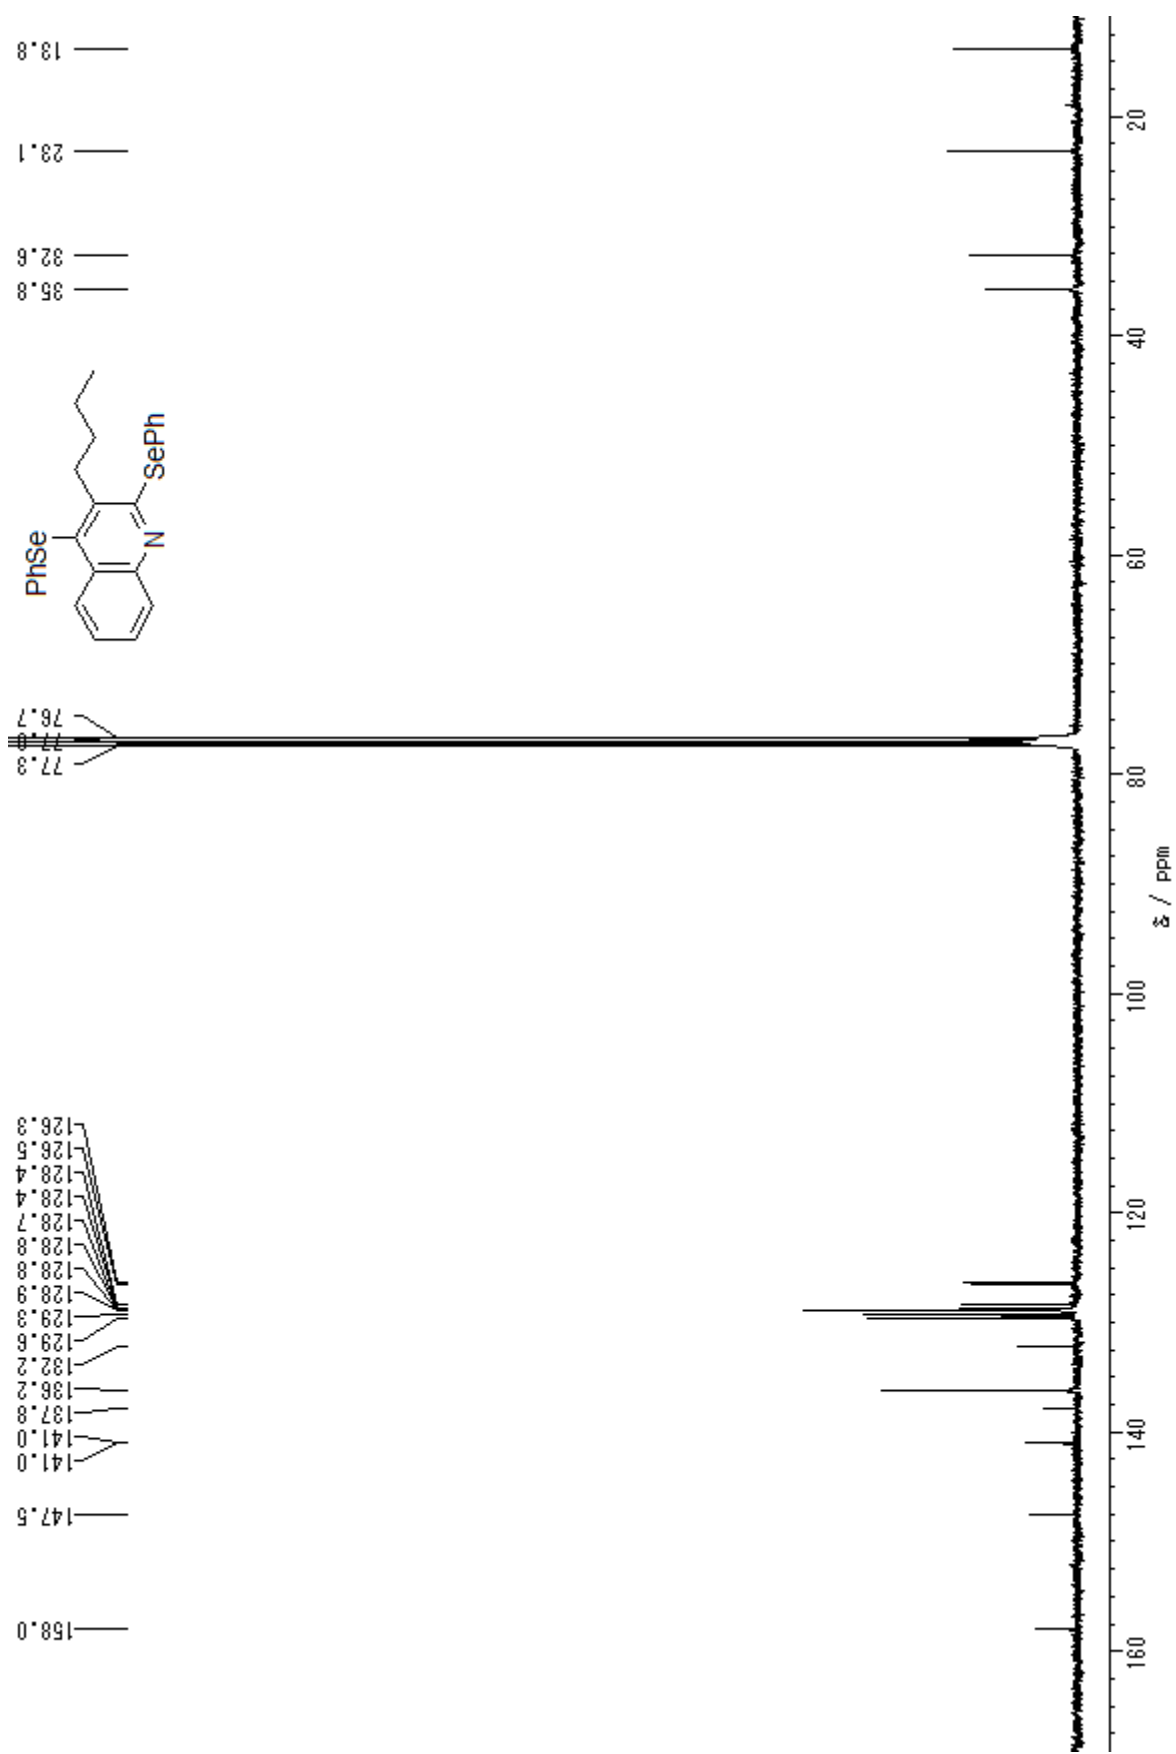

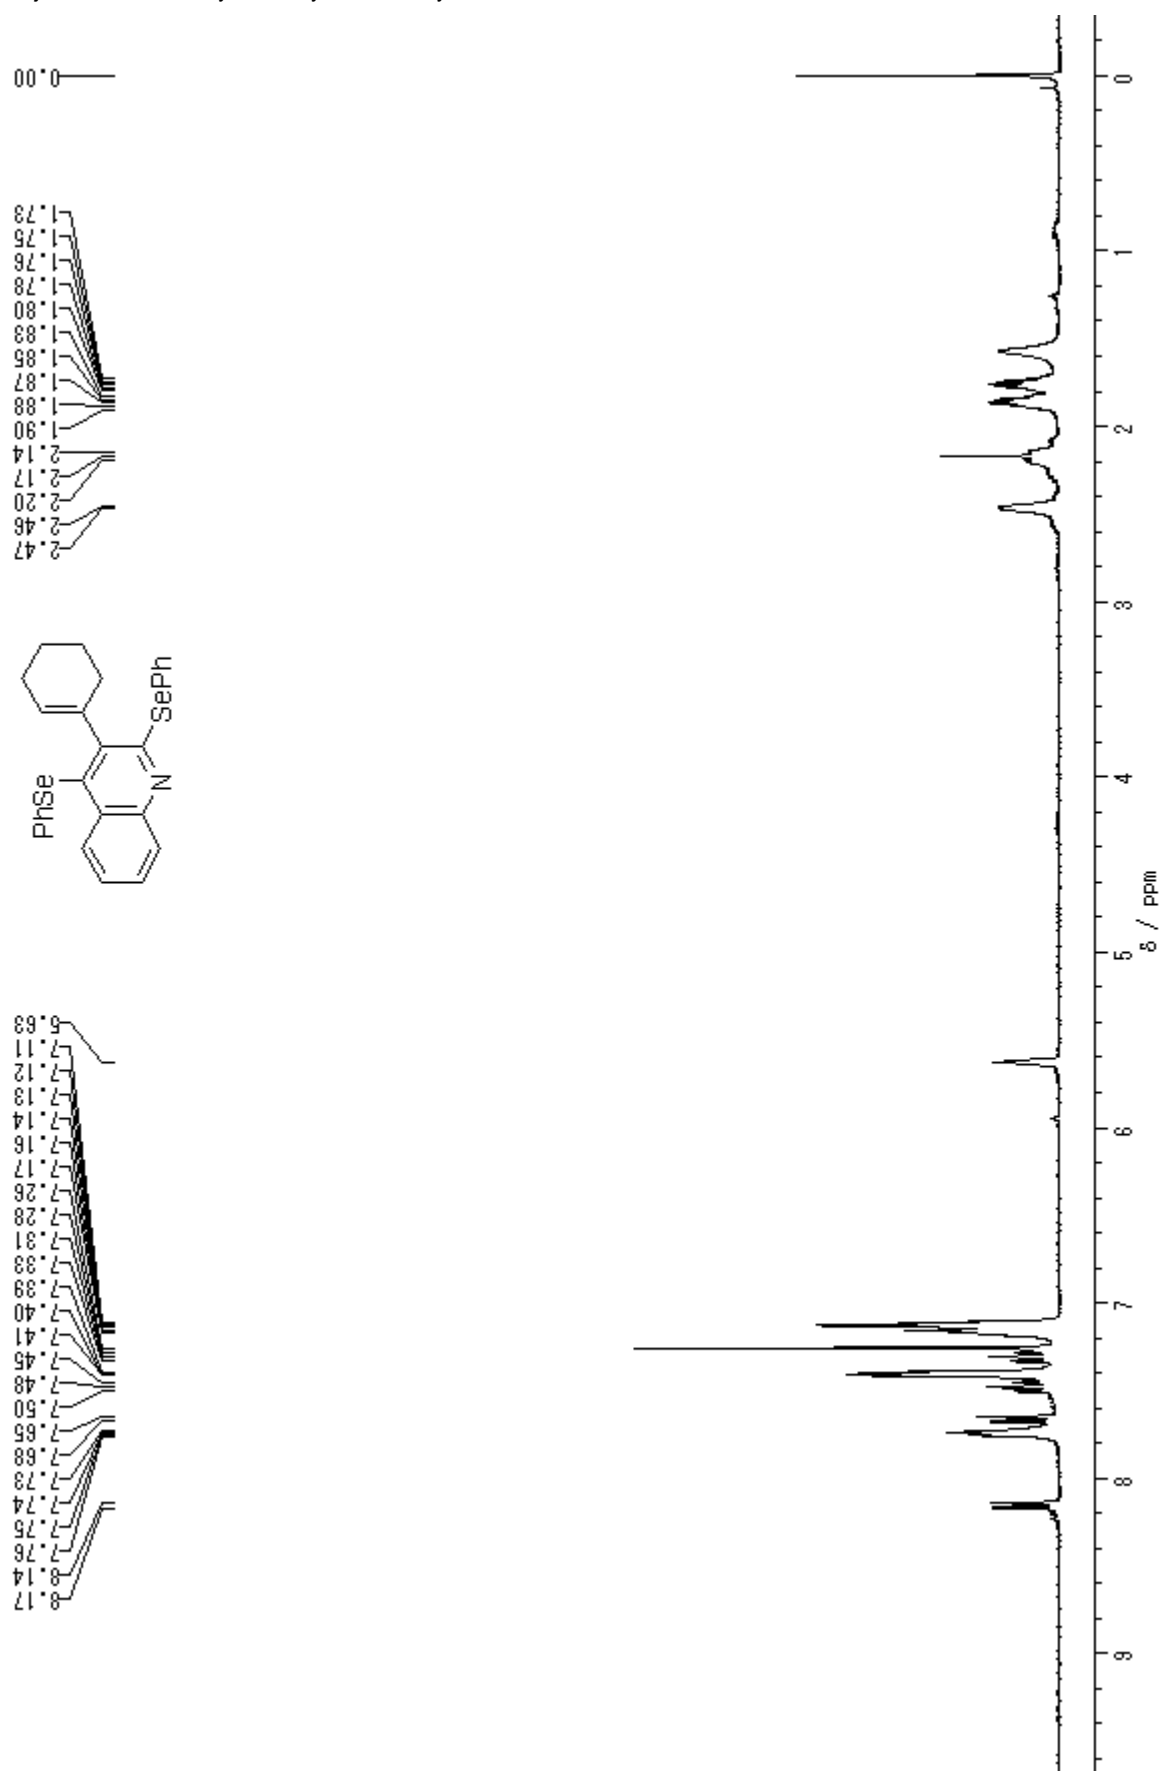

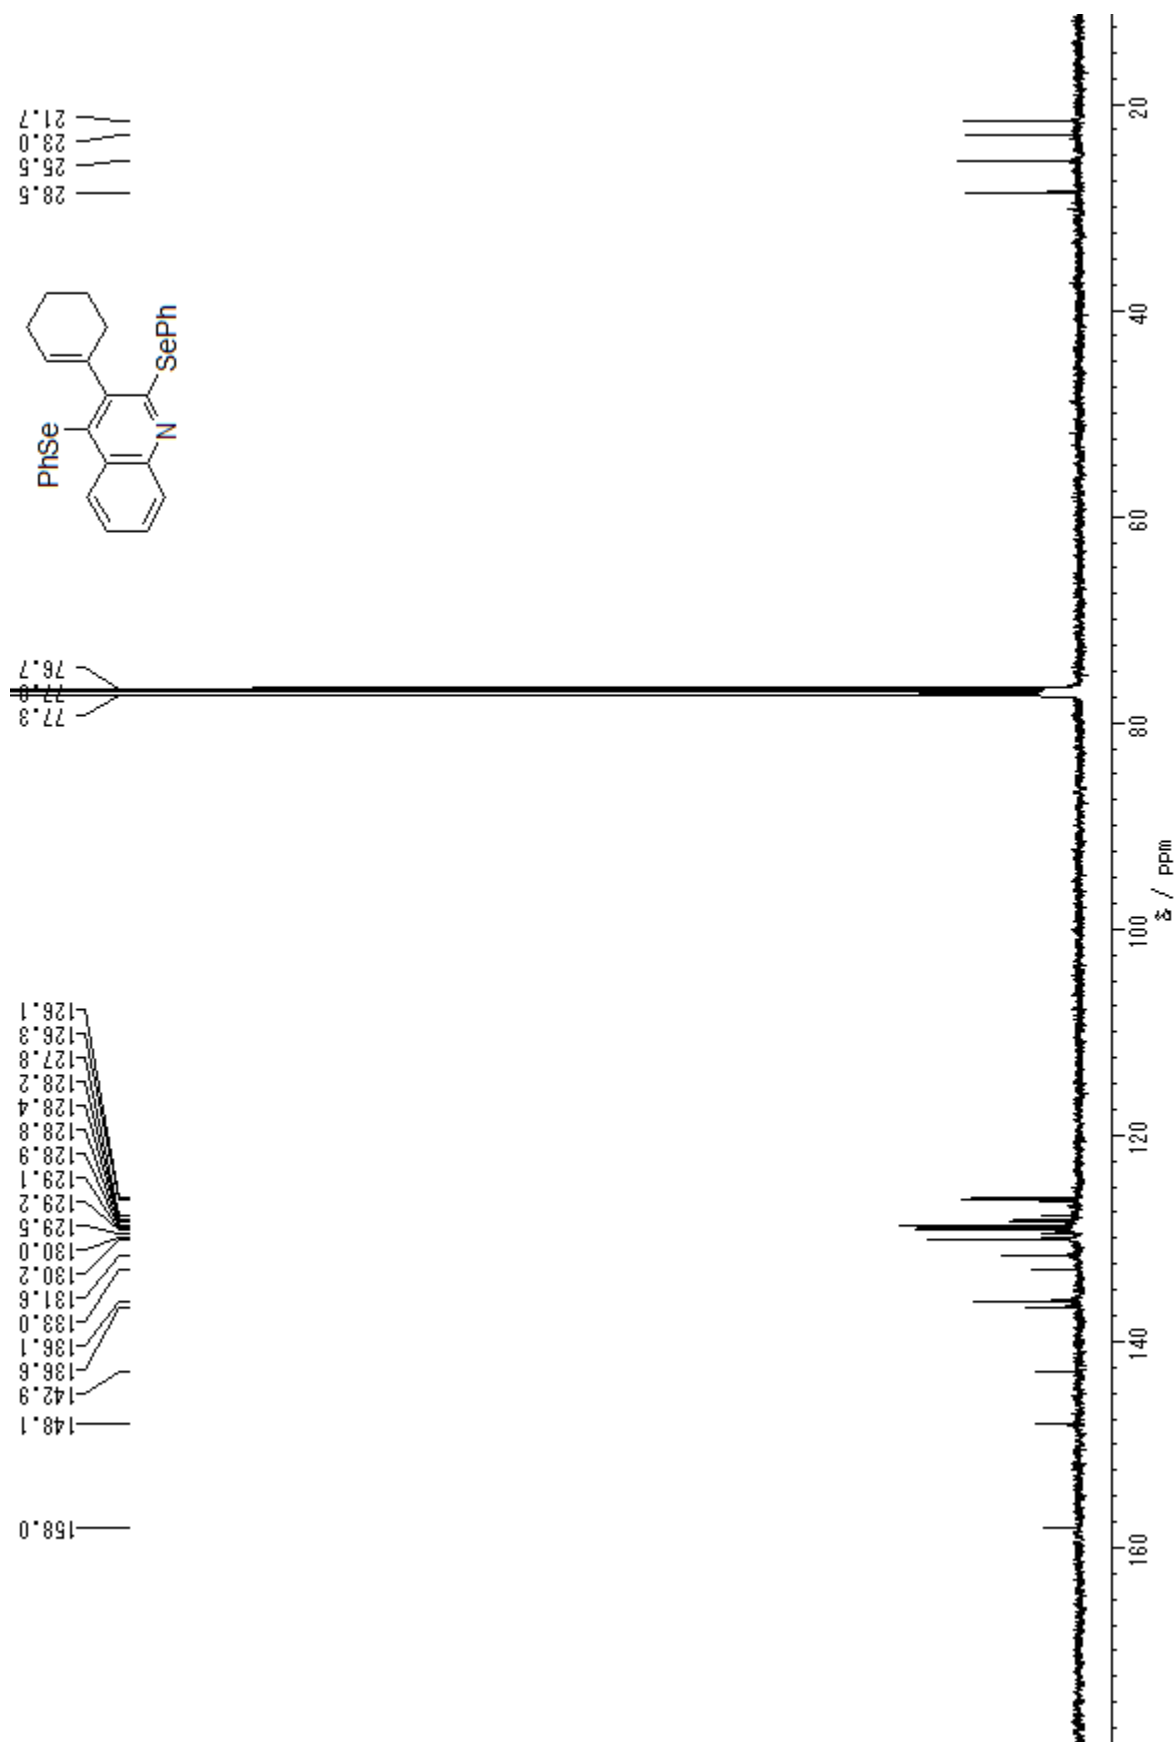

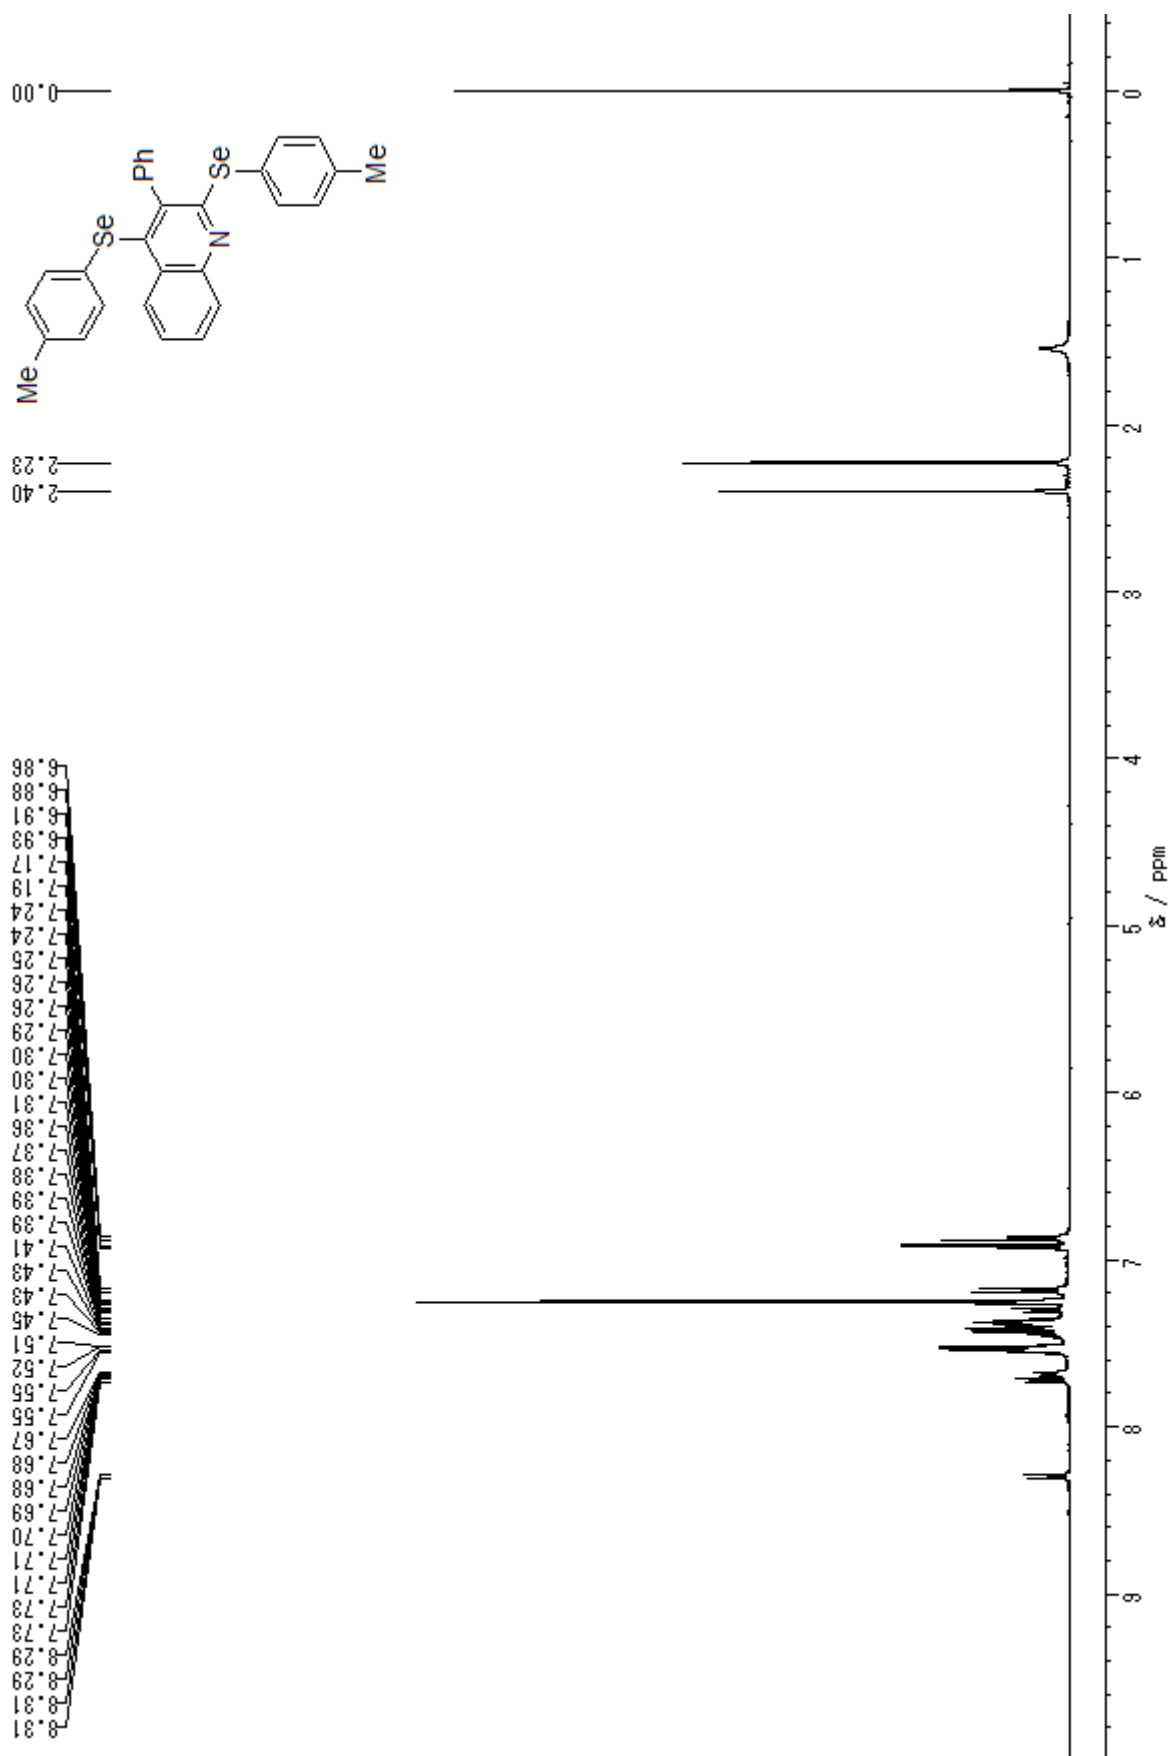



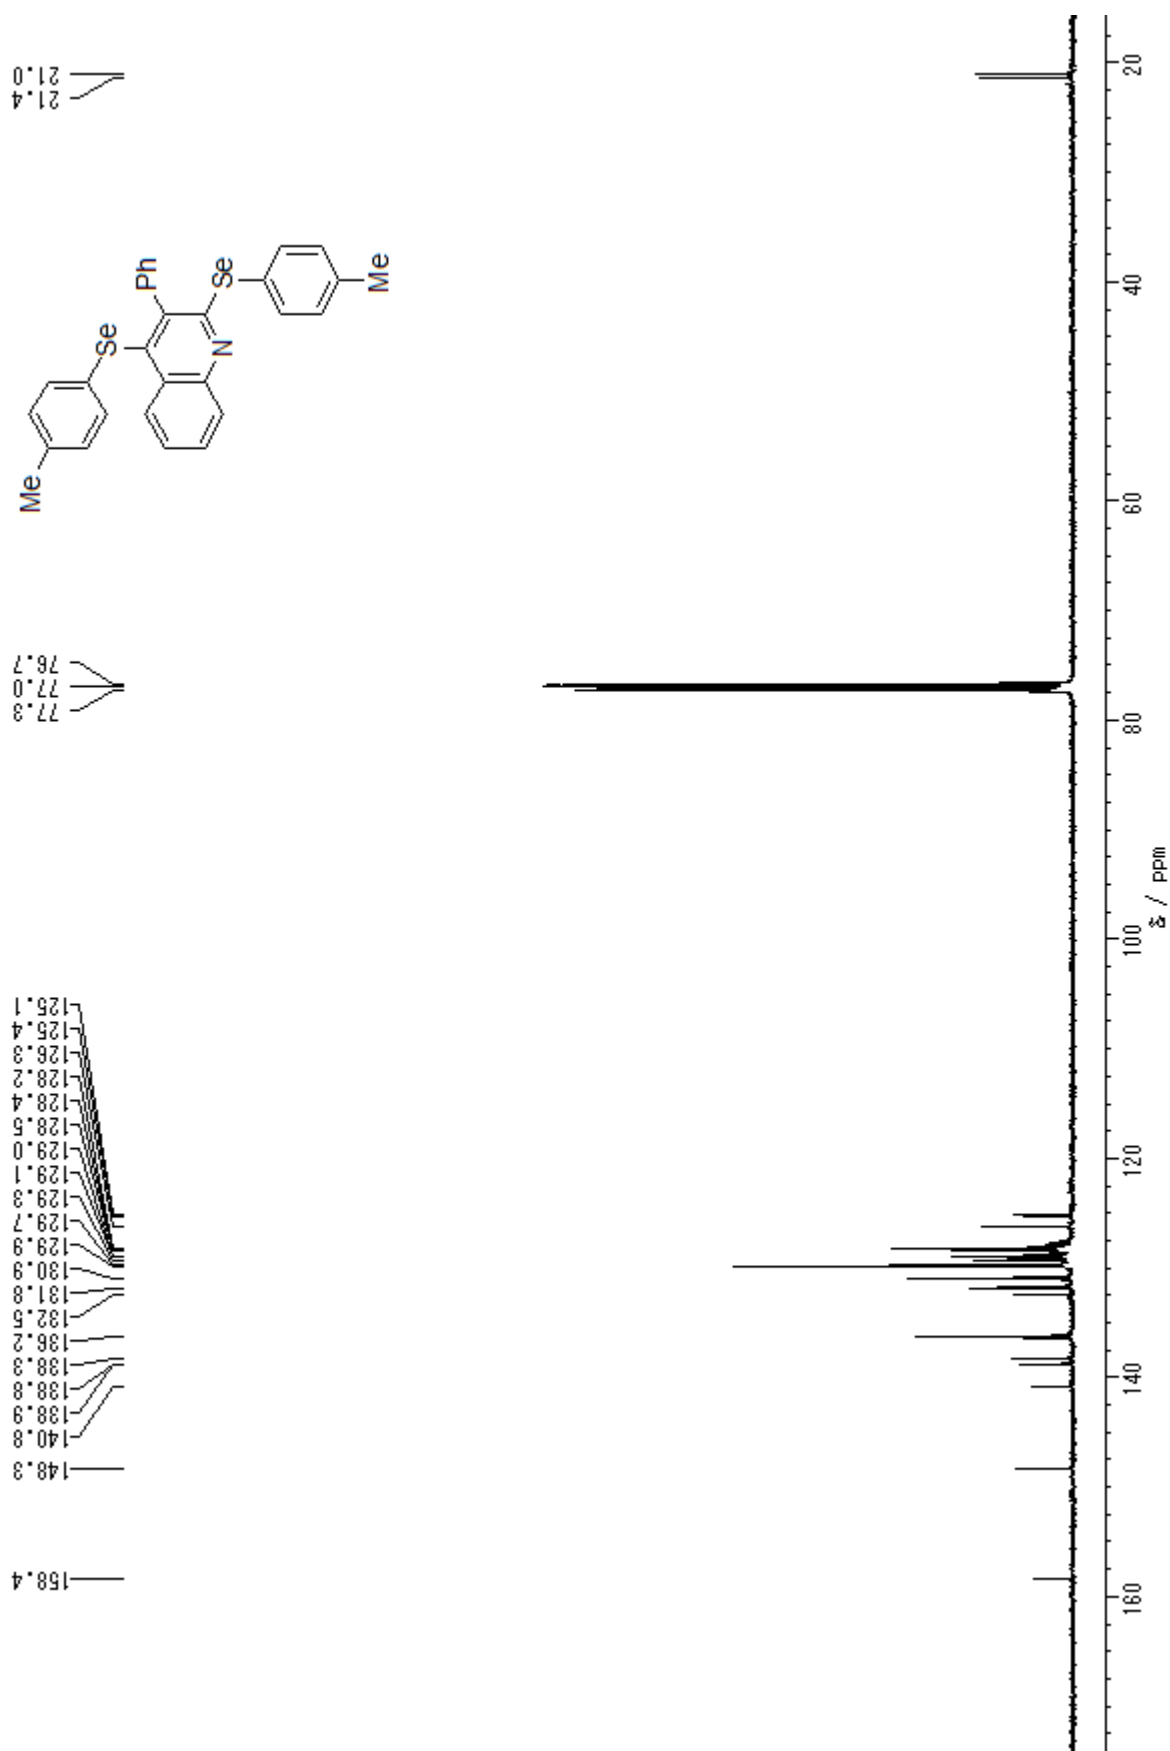

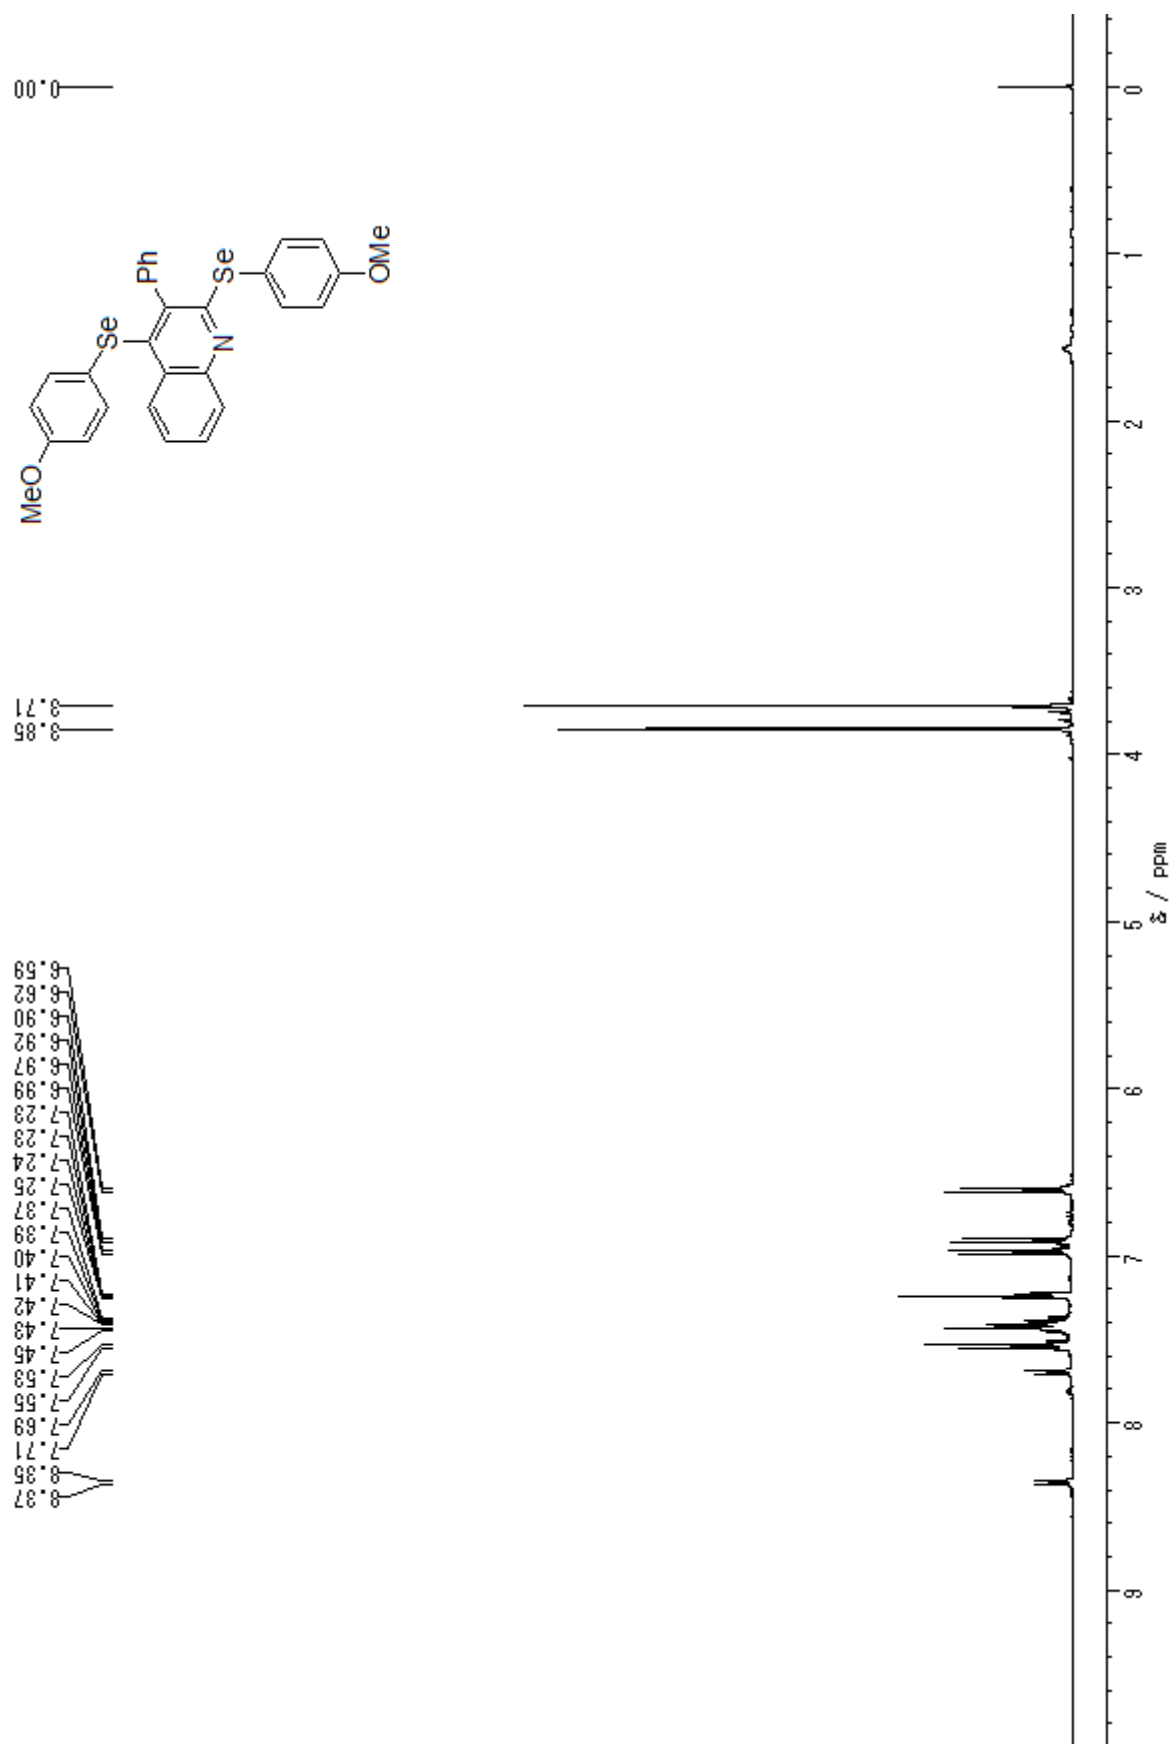

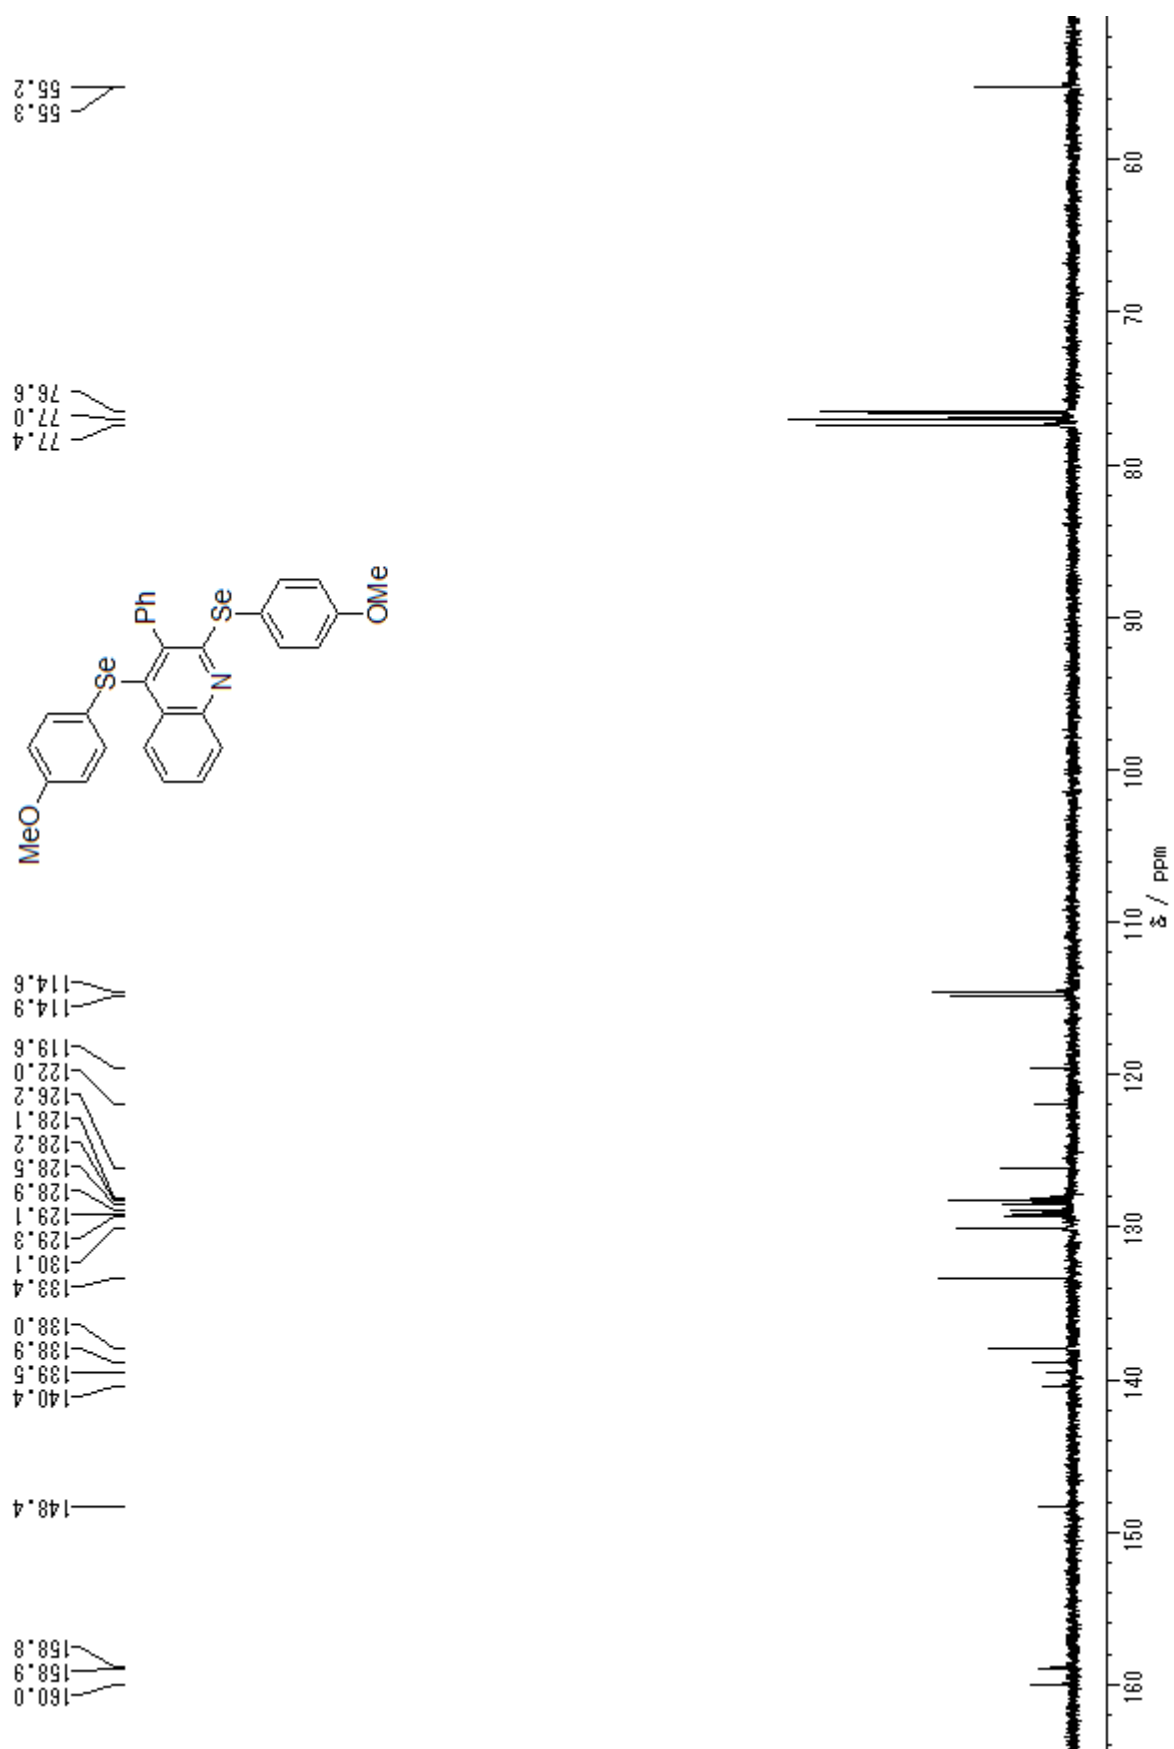

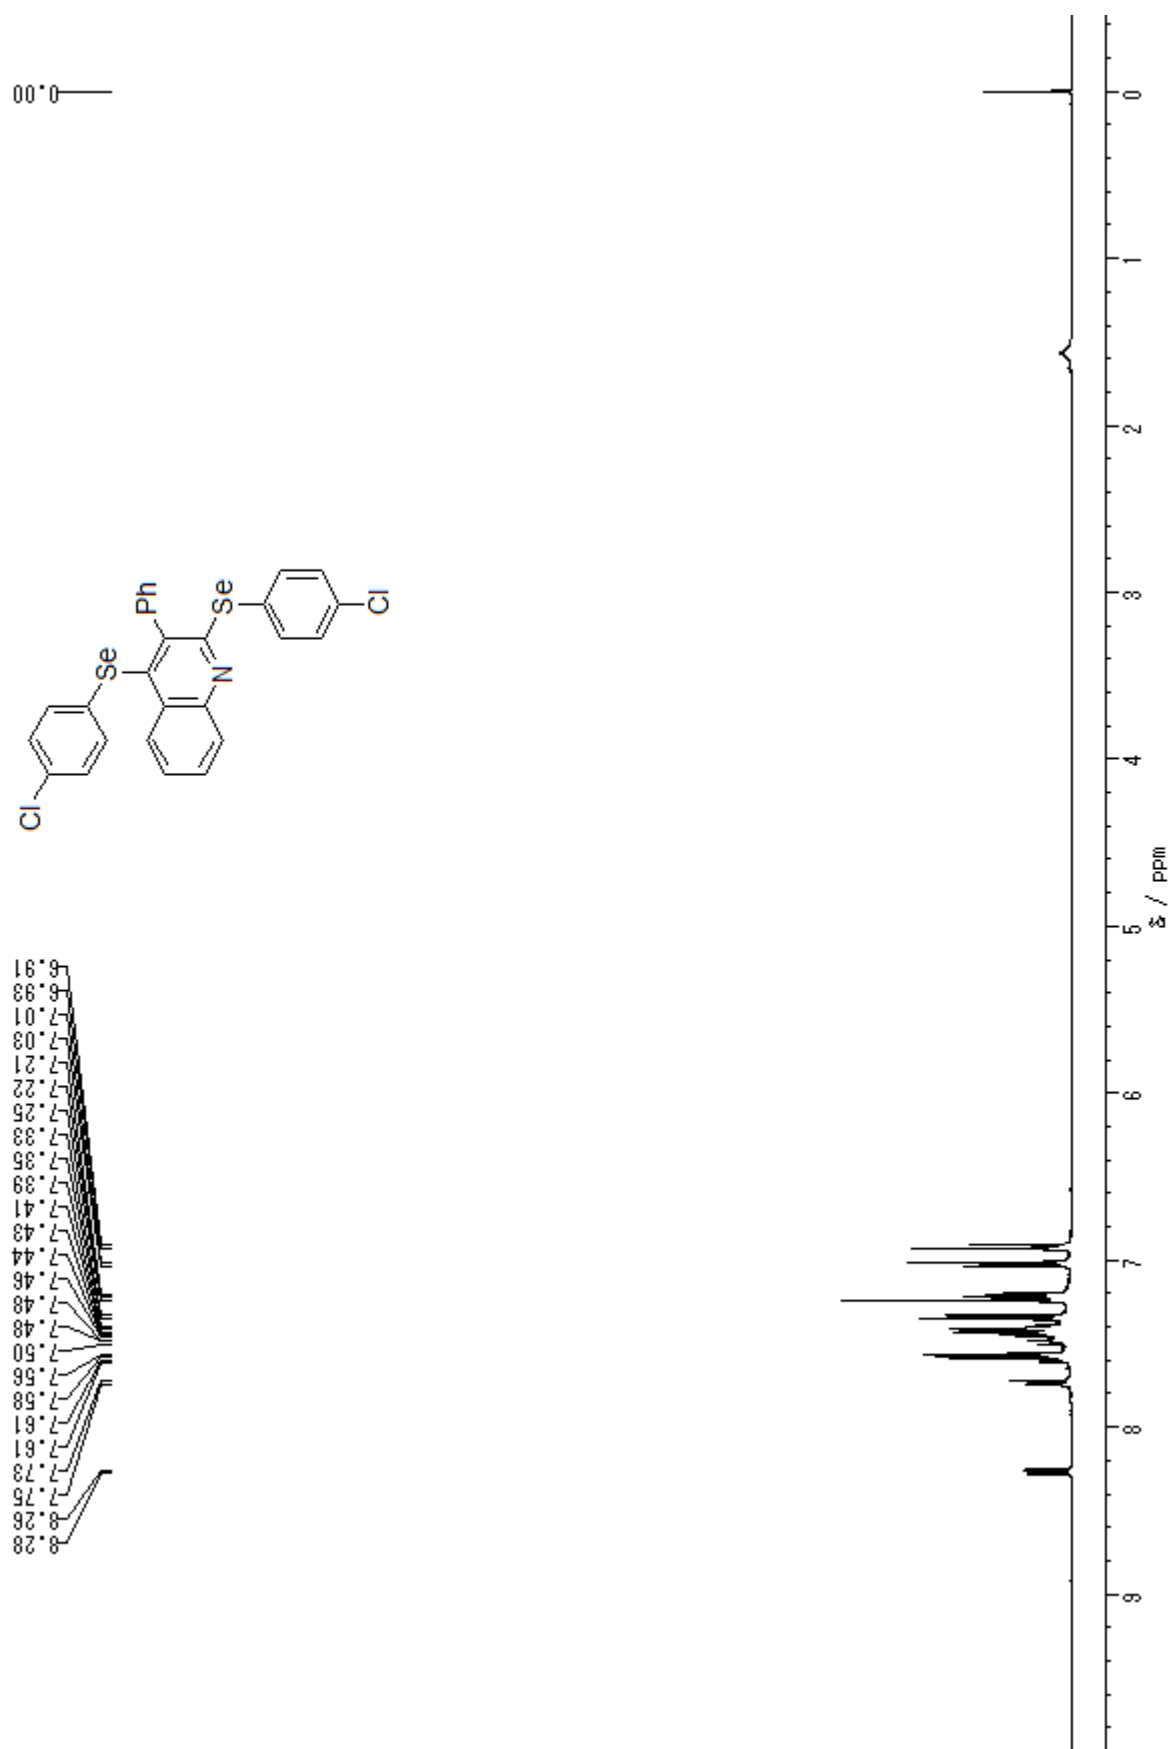

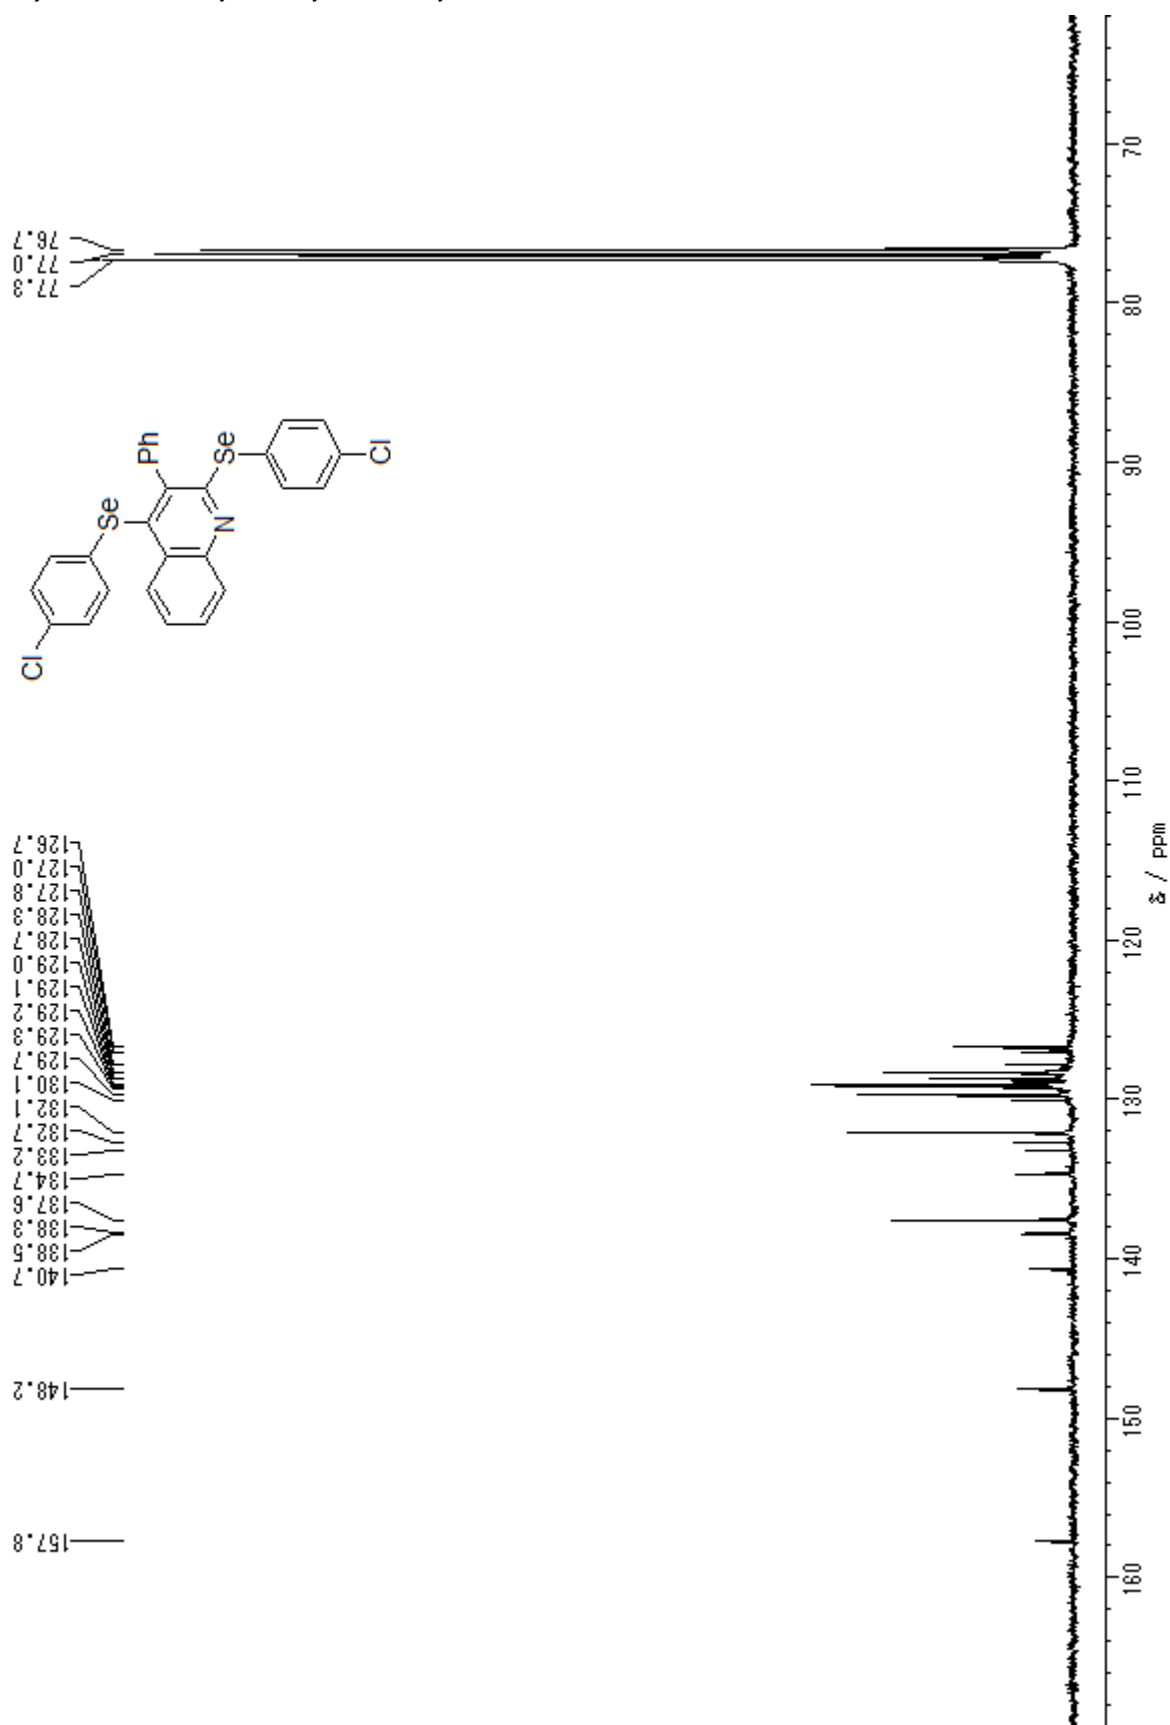

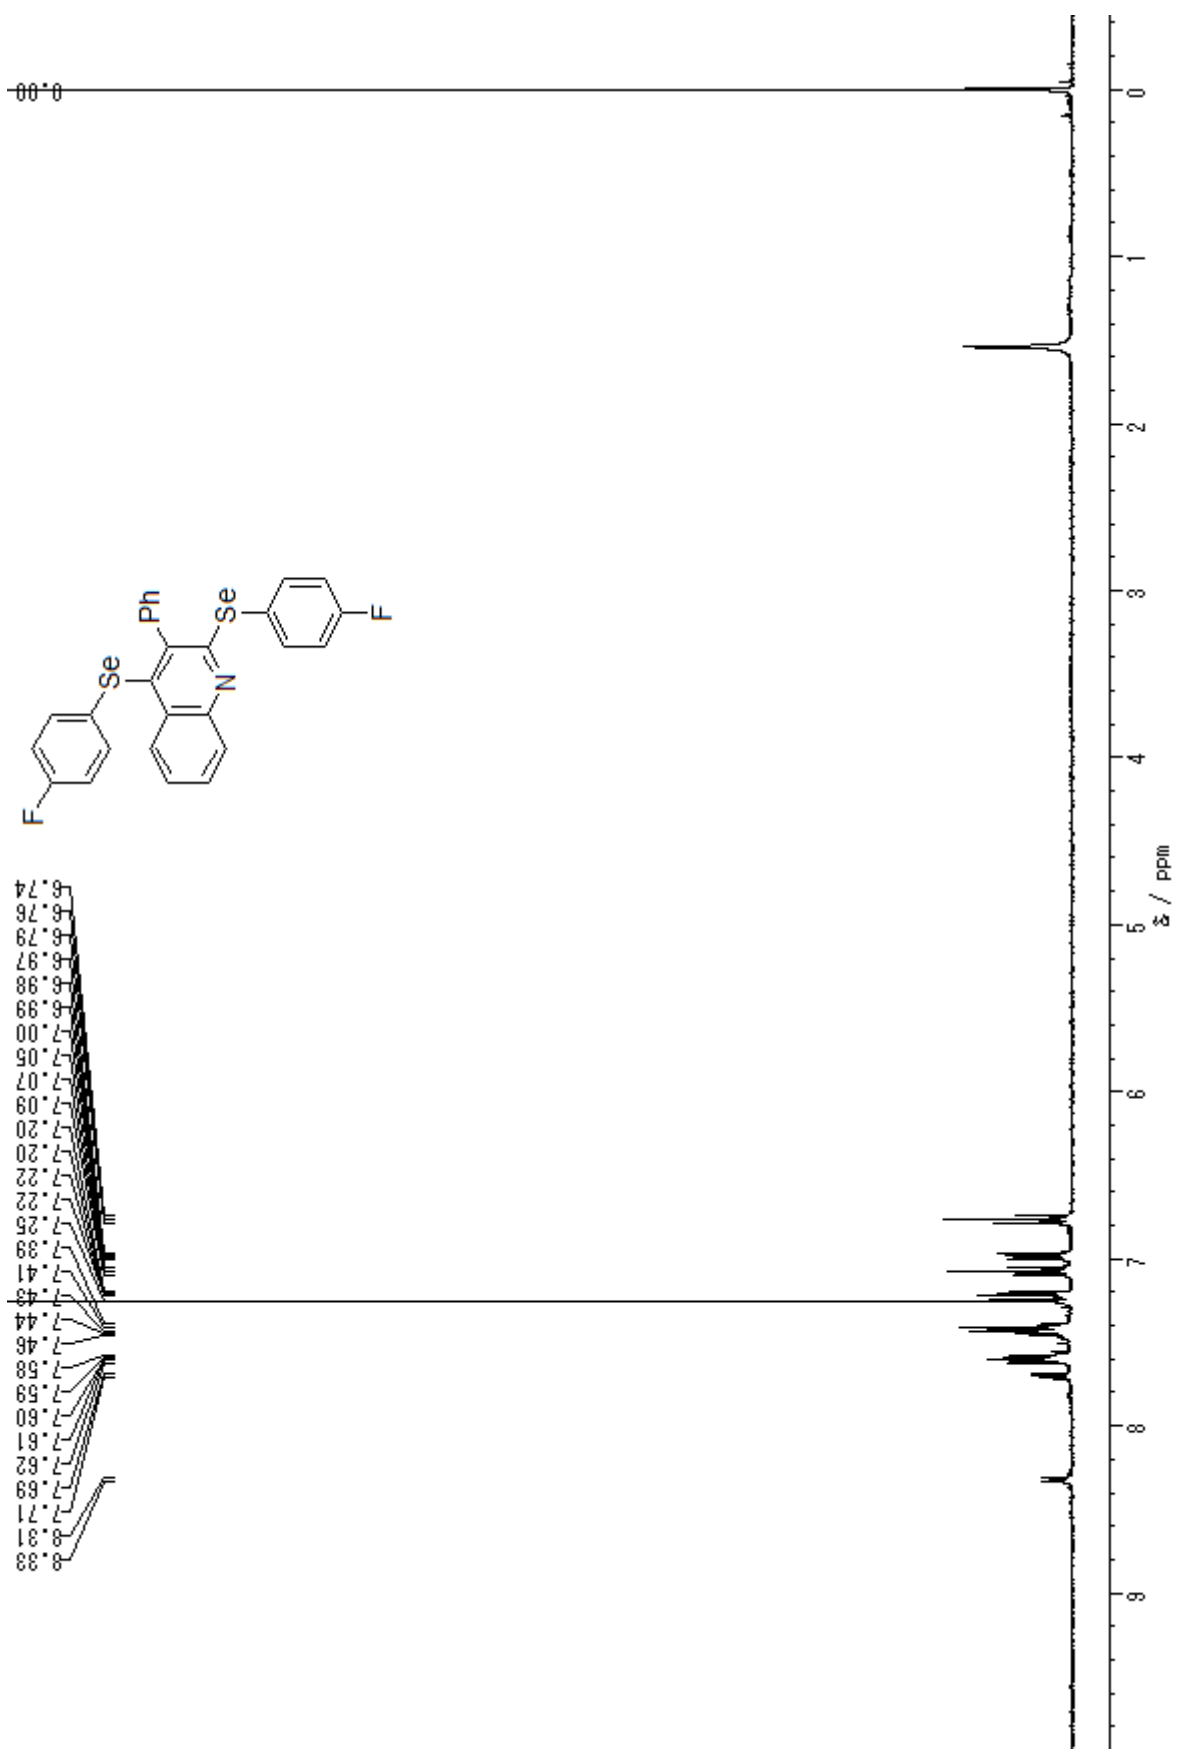

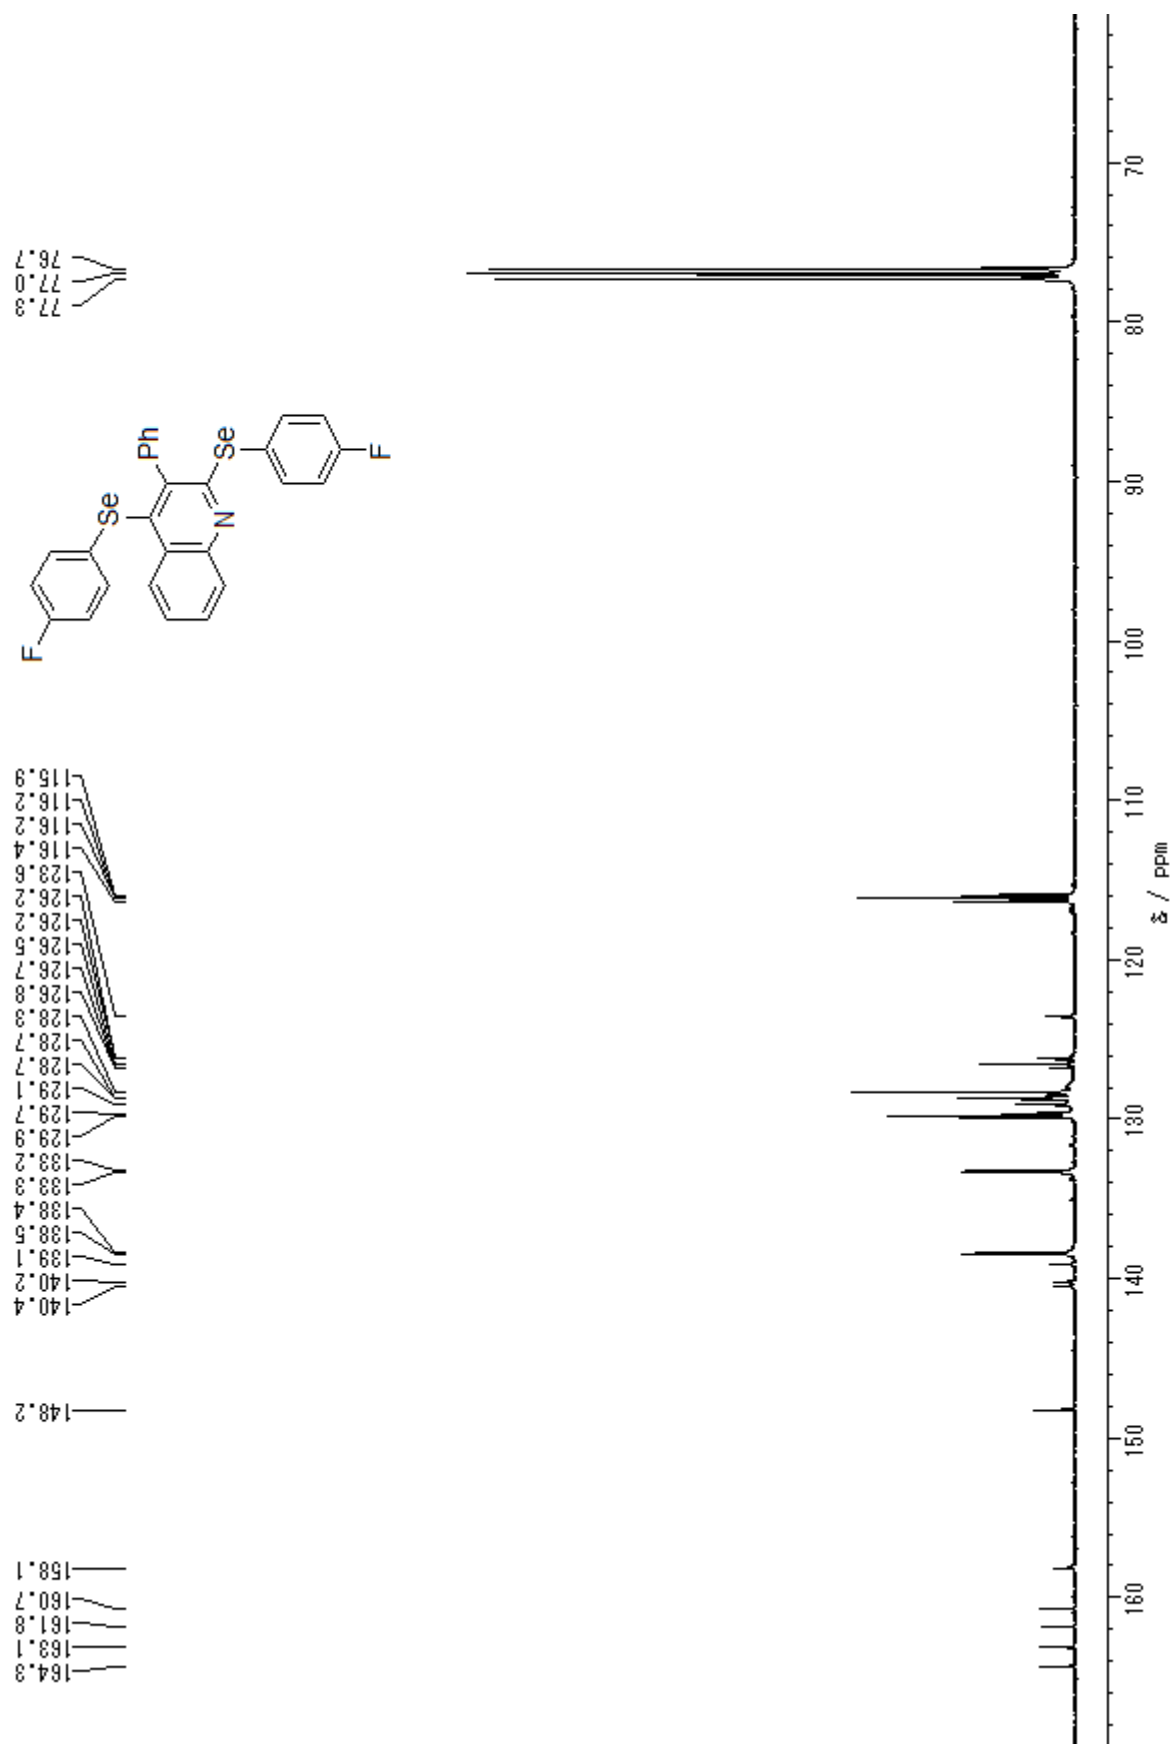

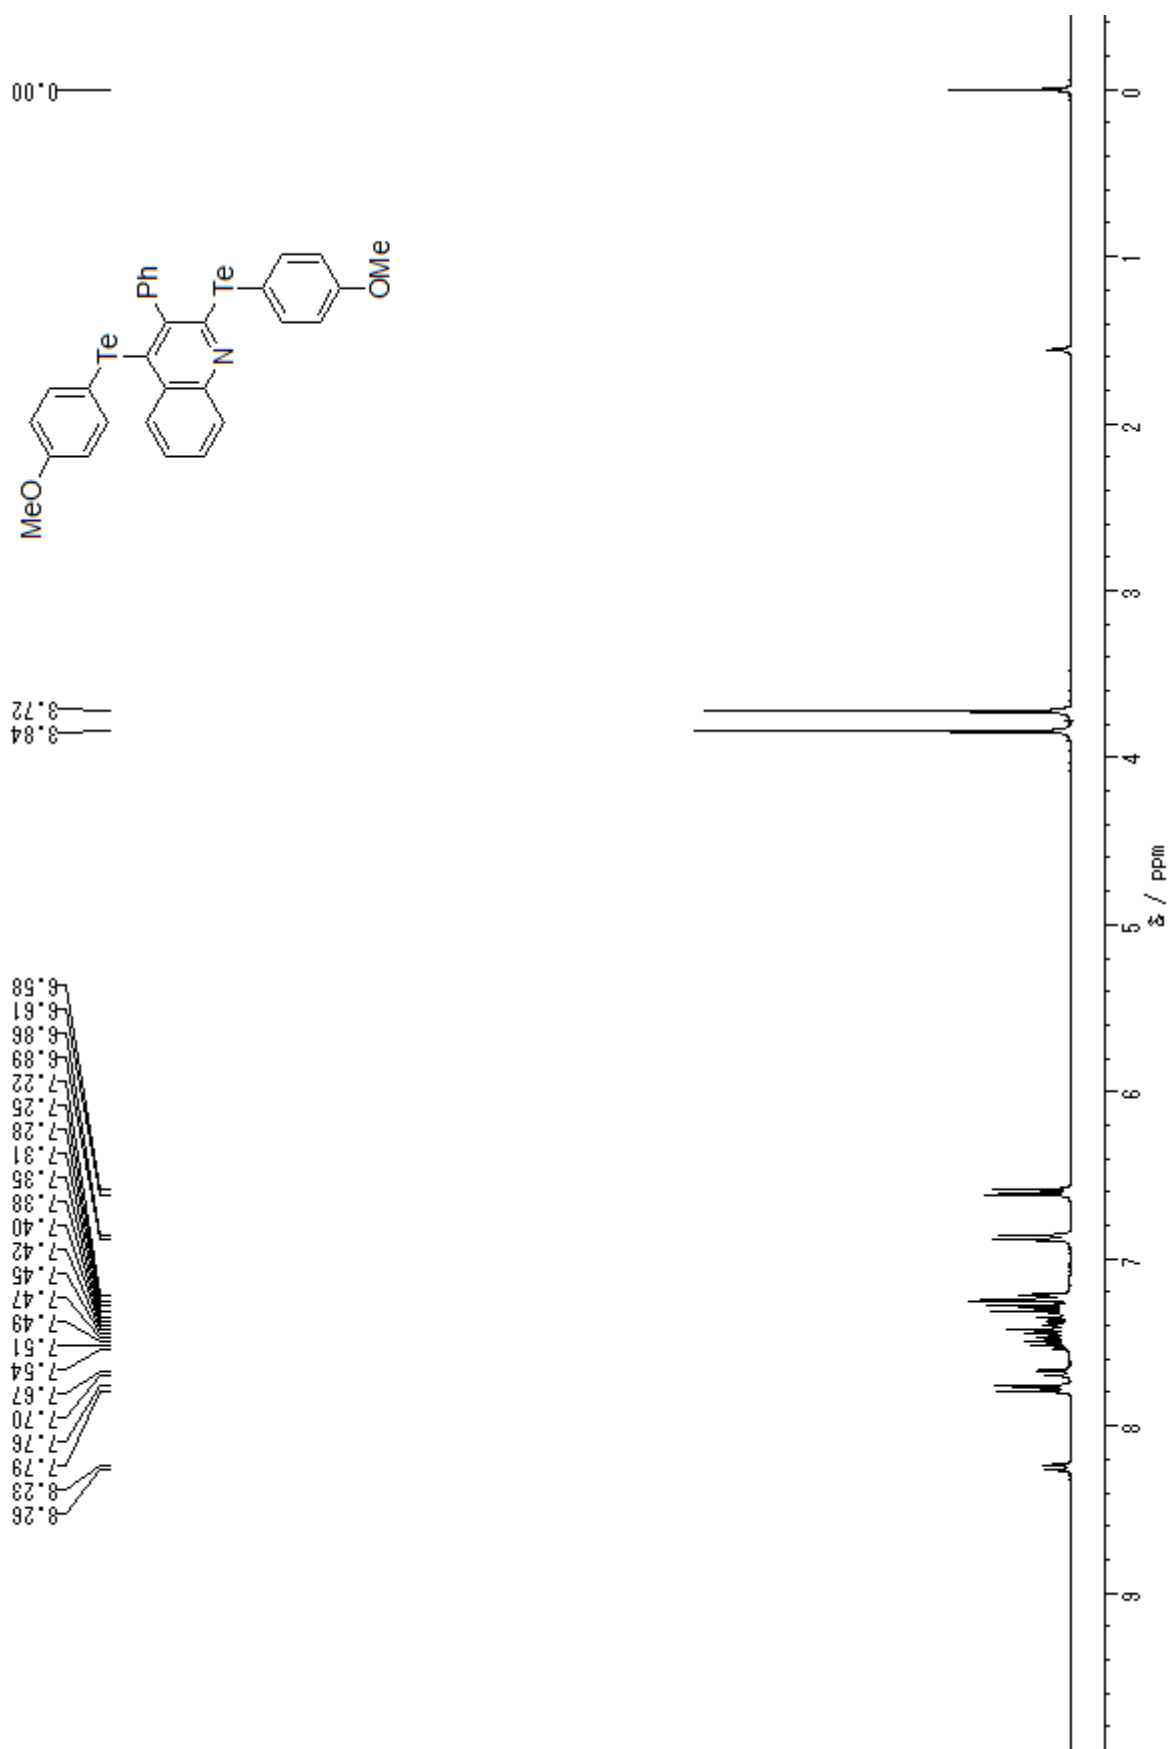



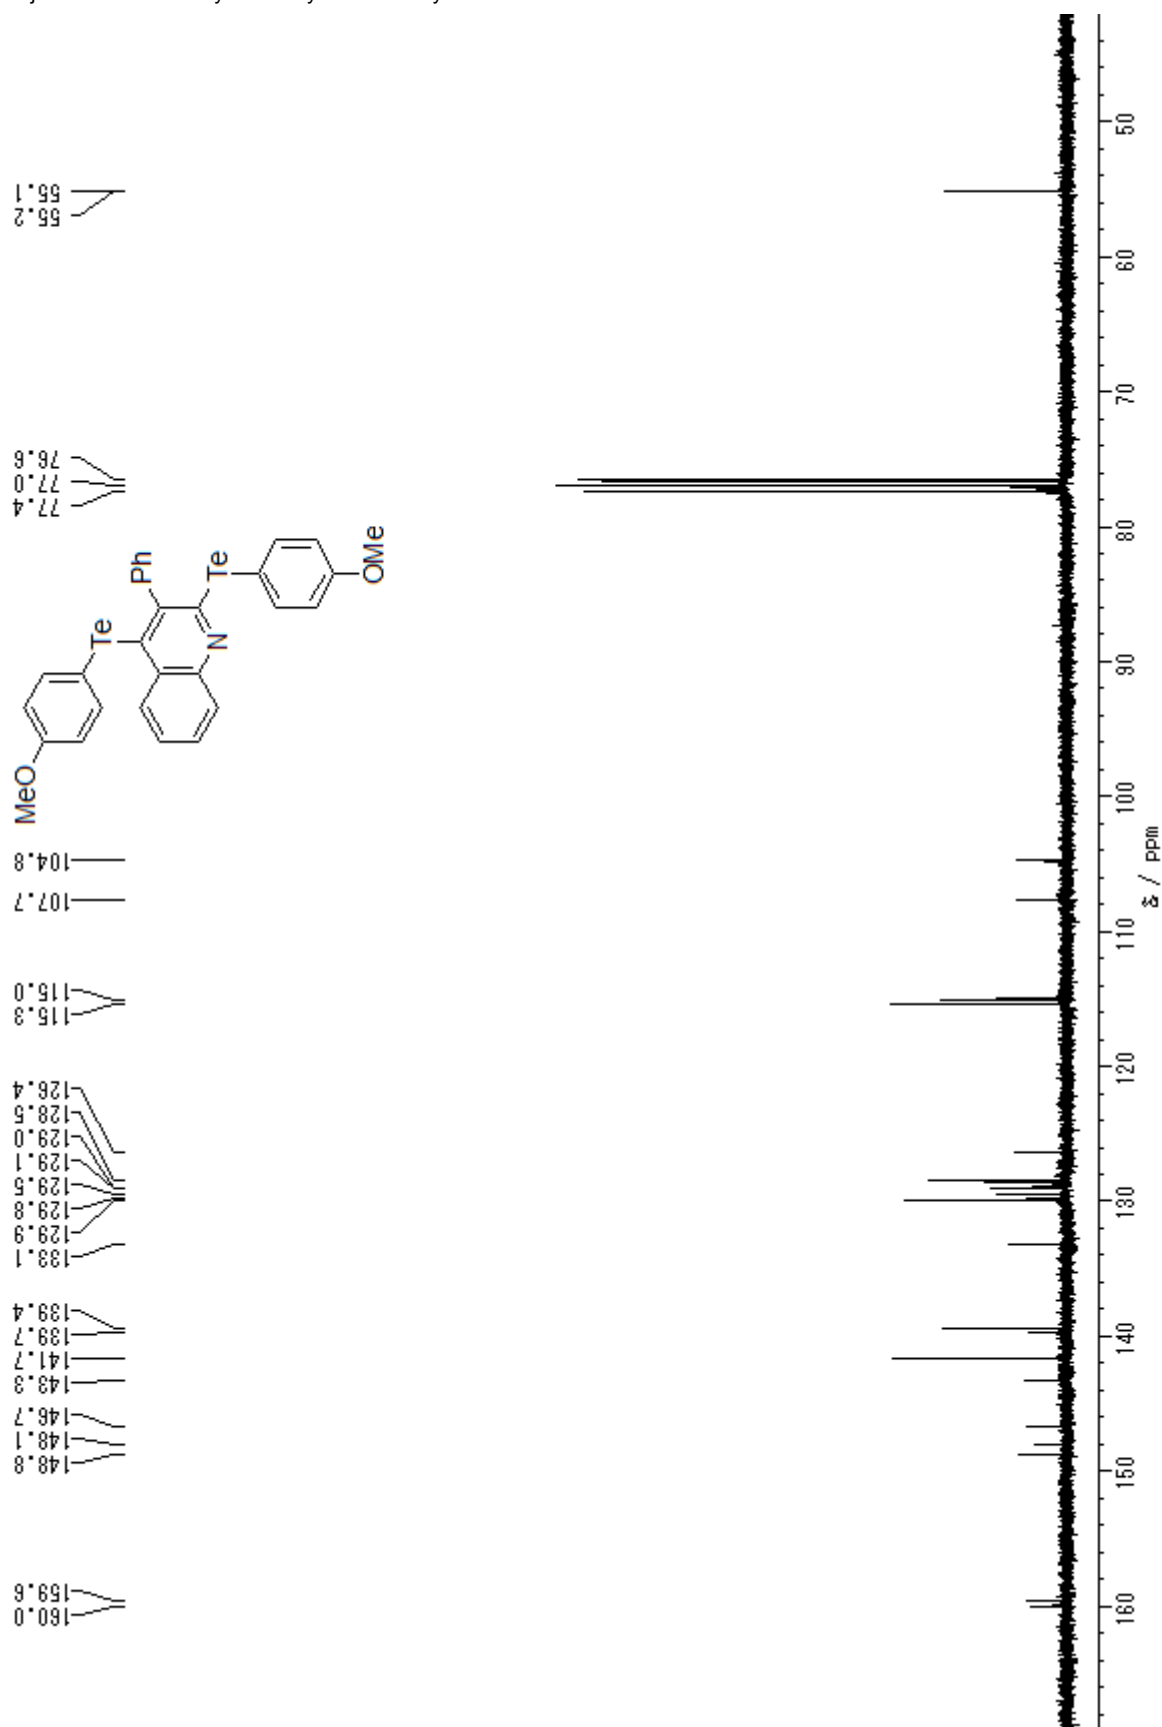

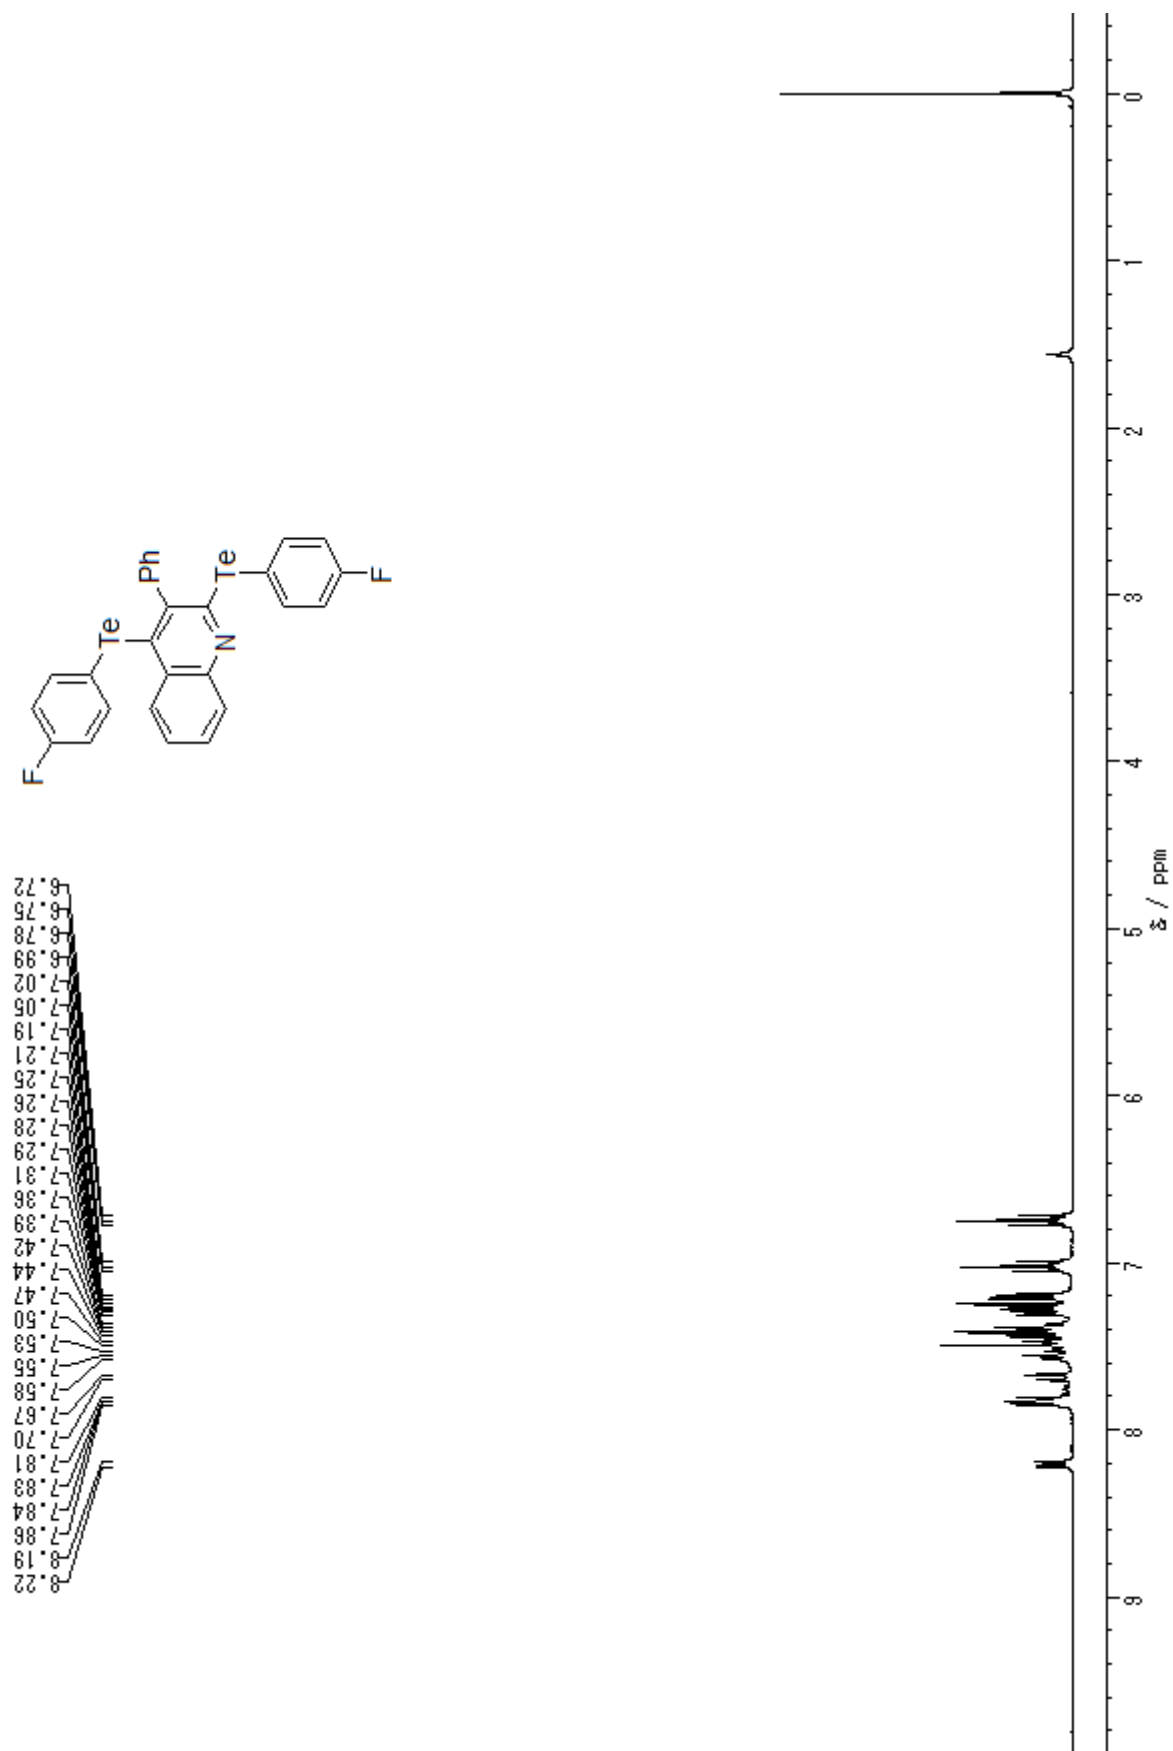

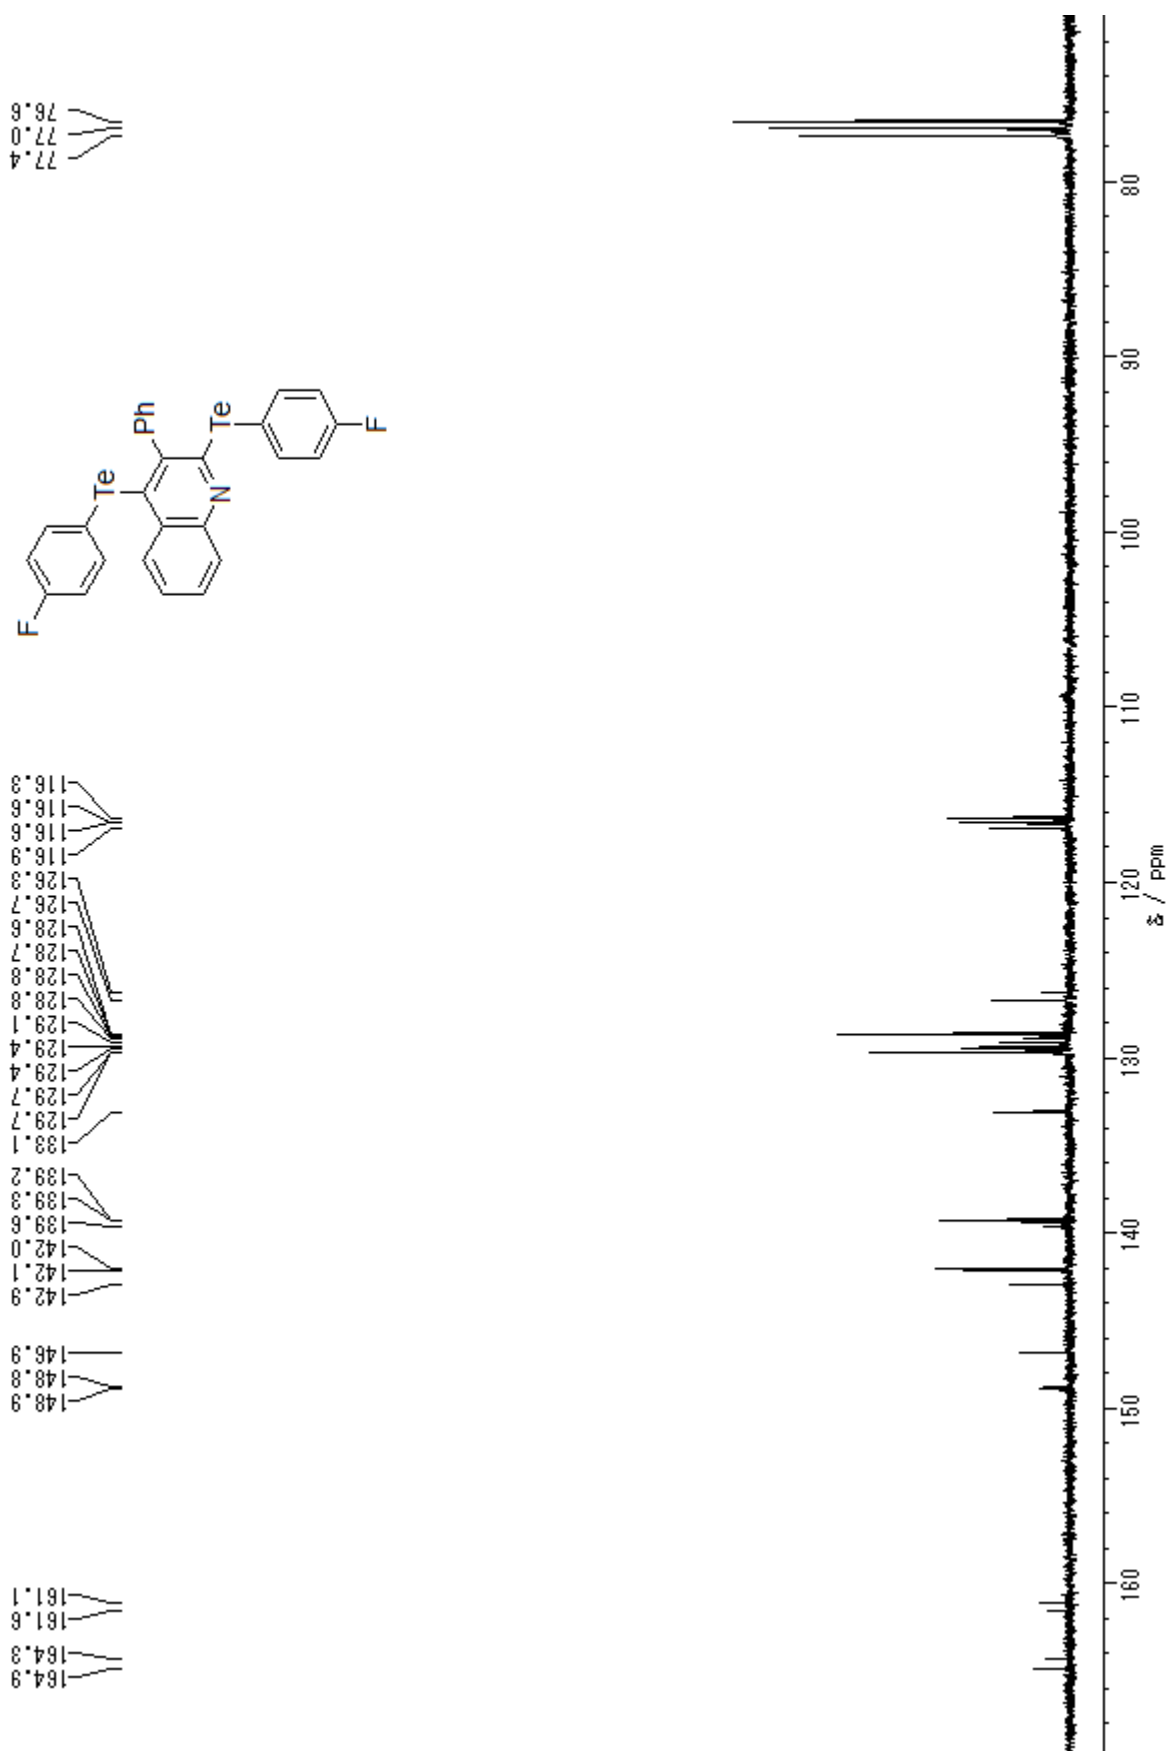

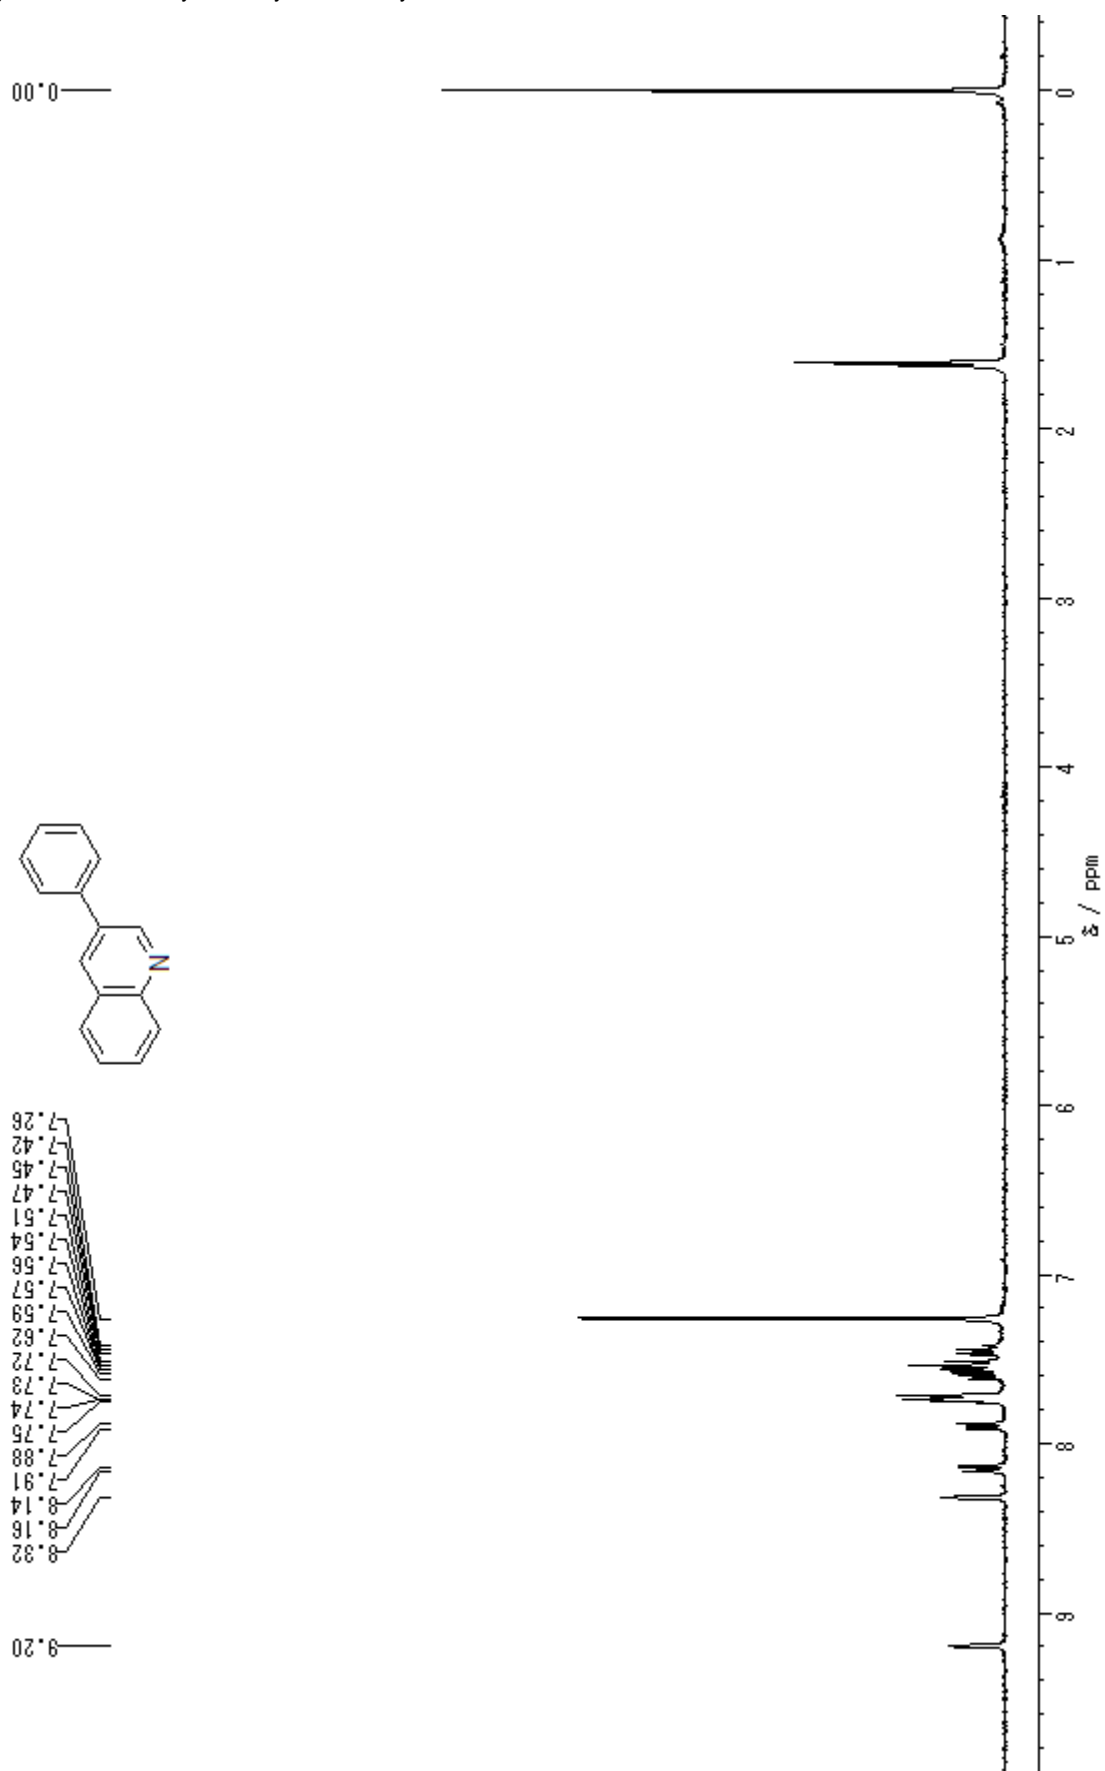

77.4  
77.0  
76.6

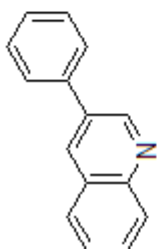

137.9  
149.9  
147.3  
133.8  
133.2  
129.3  
129.2  
129.1  
129.1  
128.1  
128.1  
128.0  
127.4  
127.0

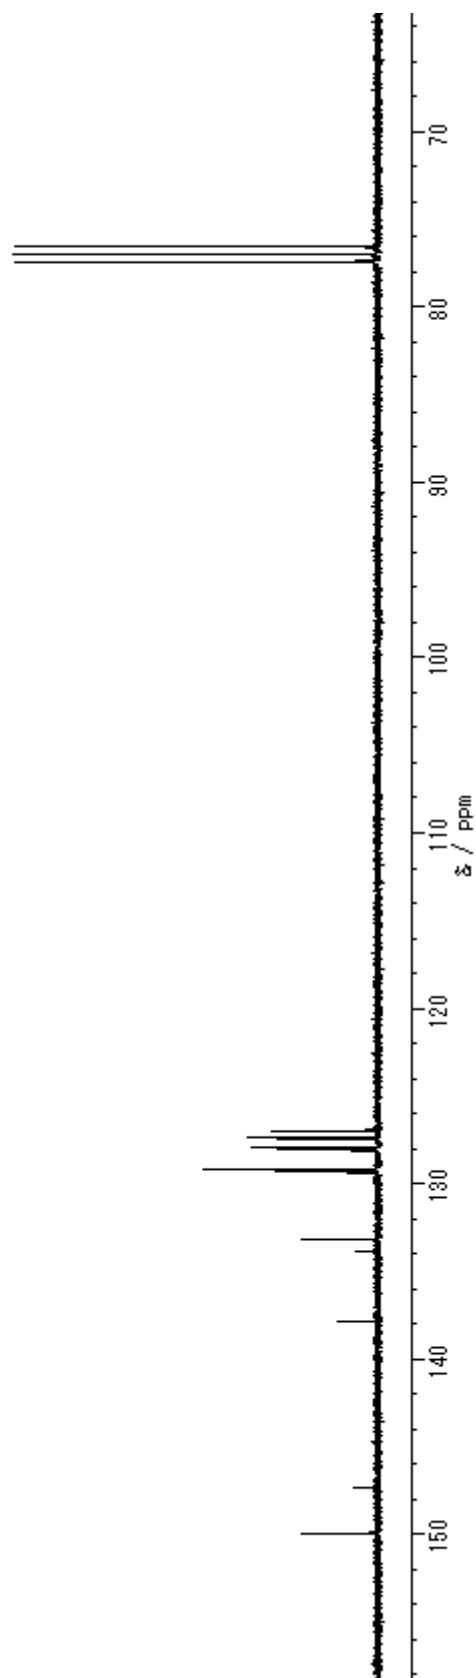

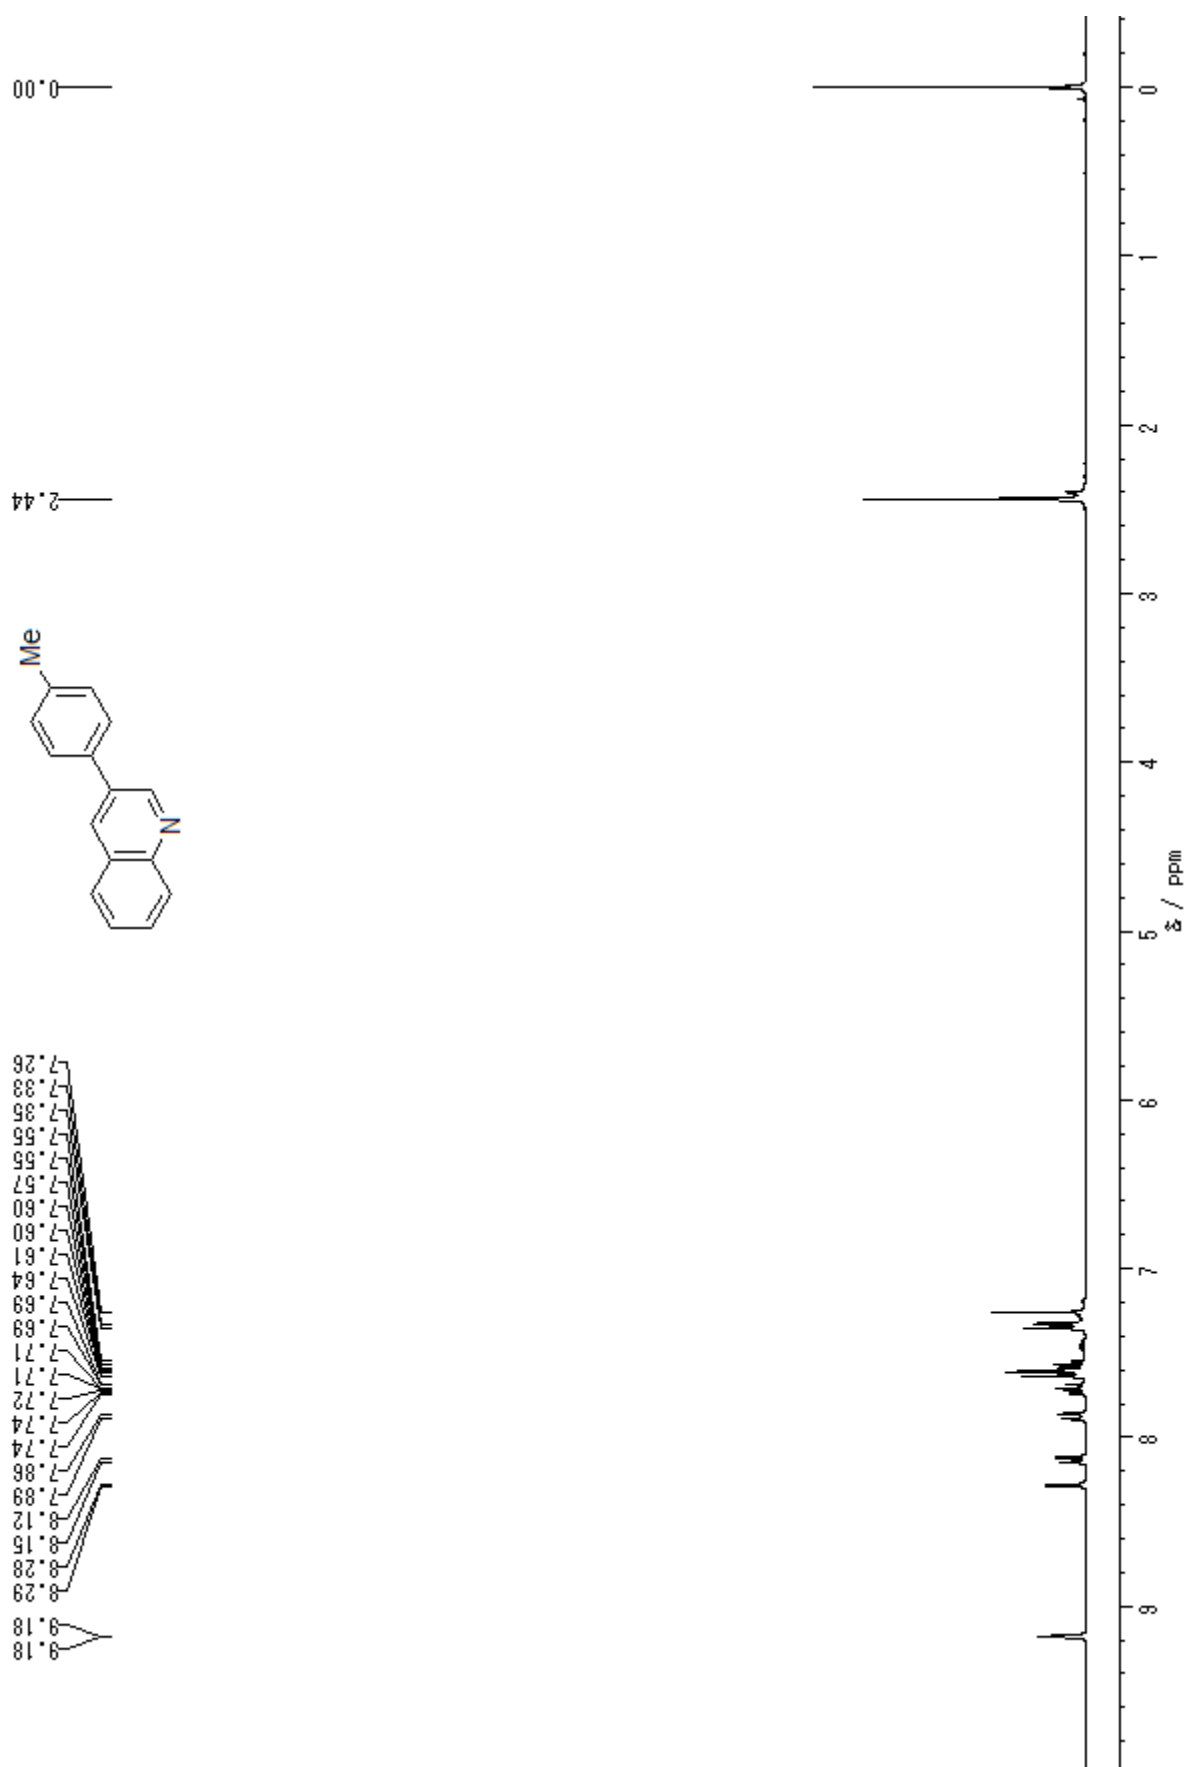

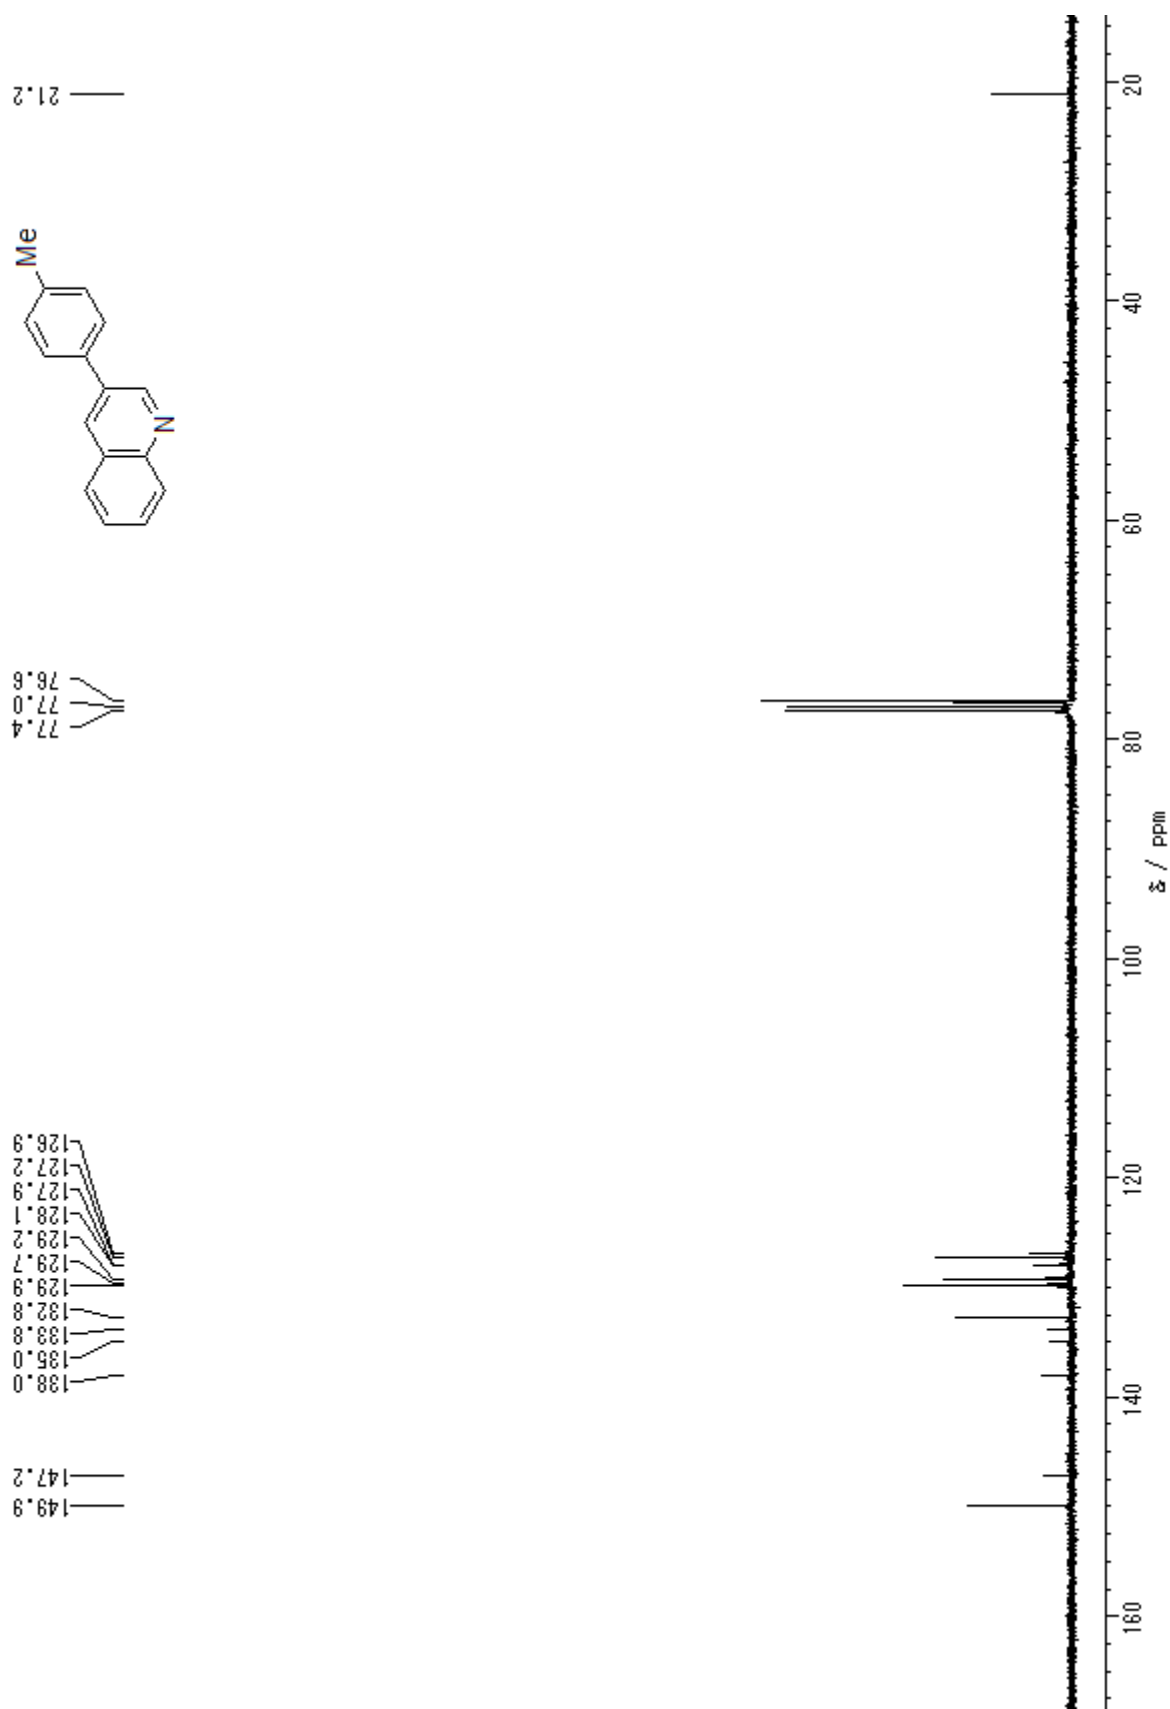

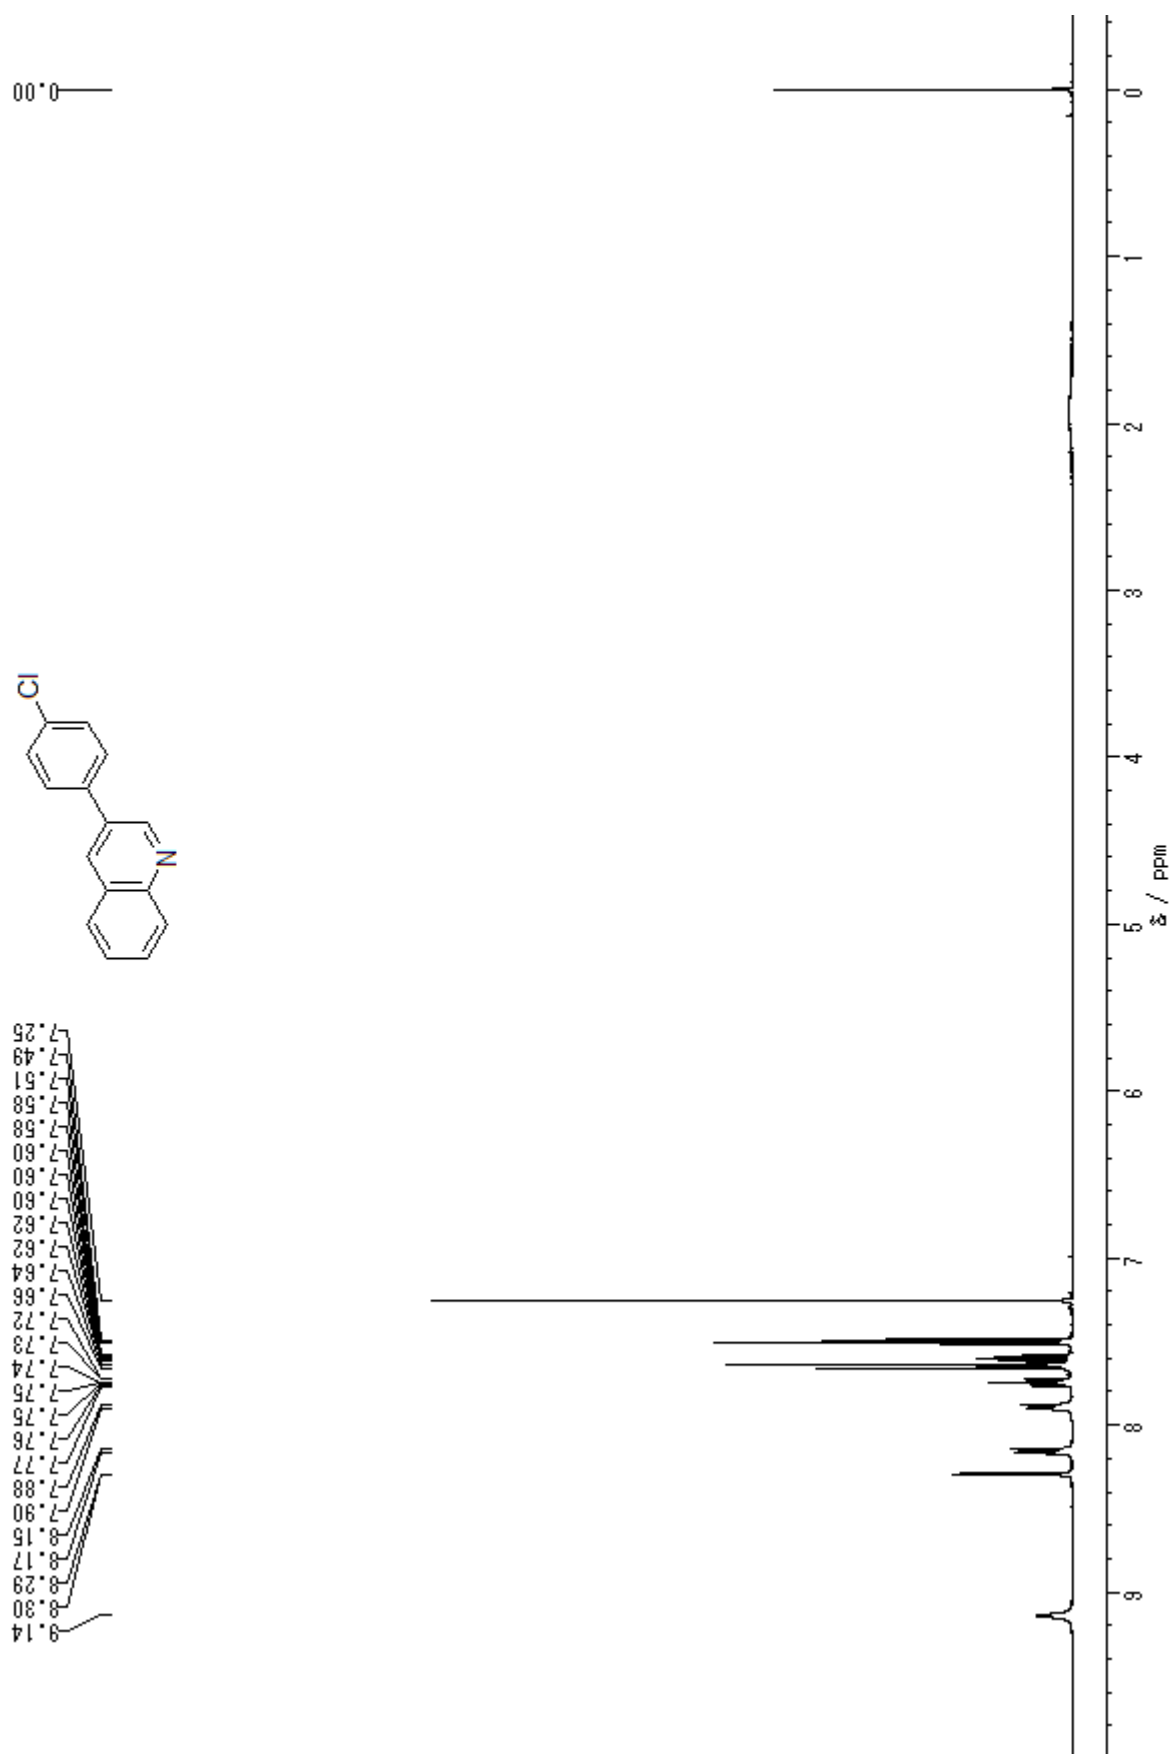



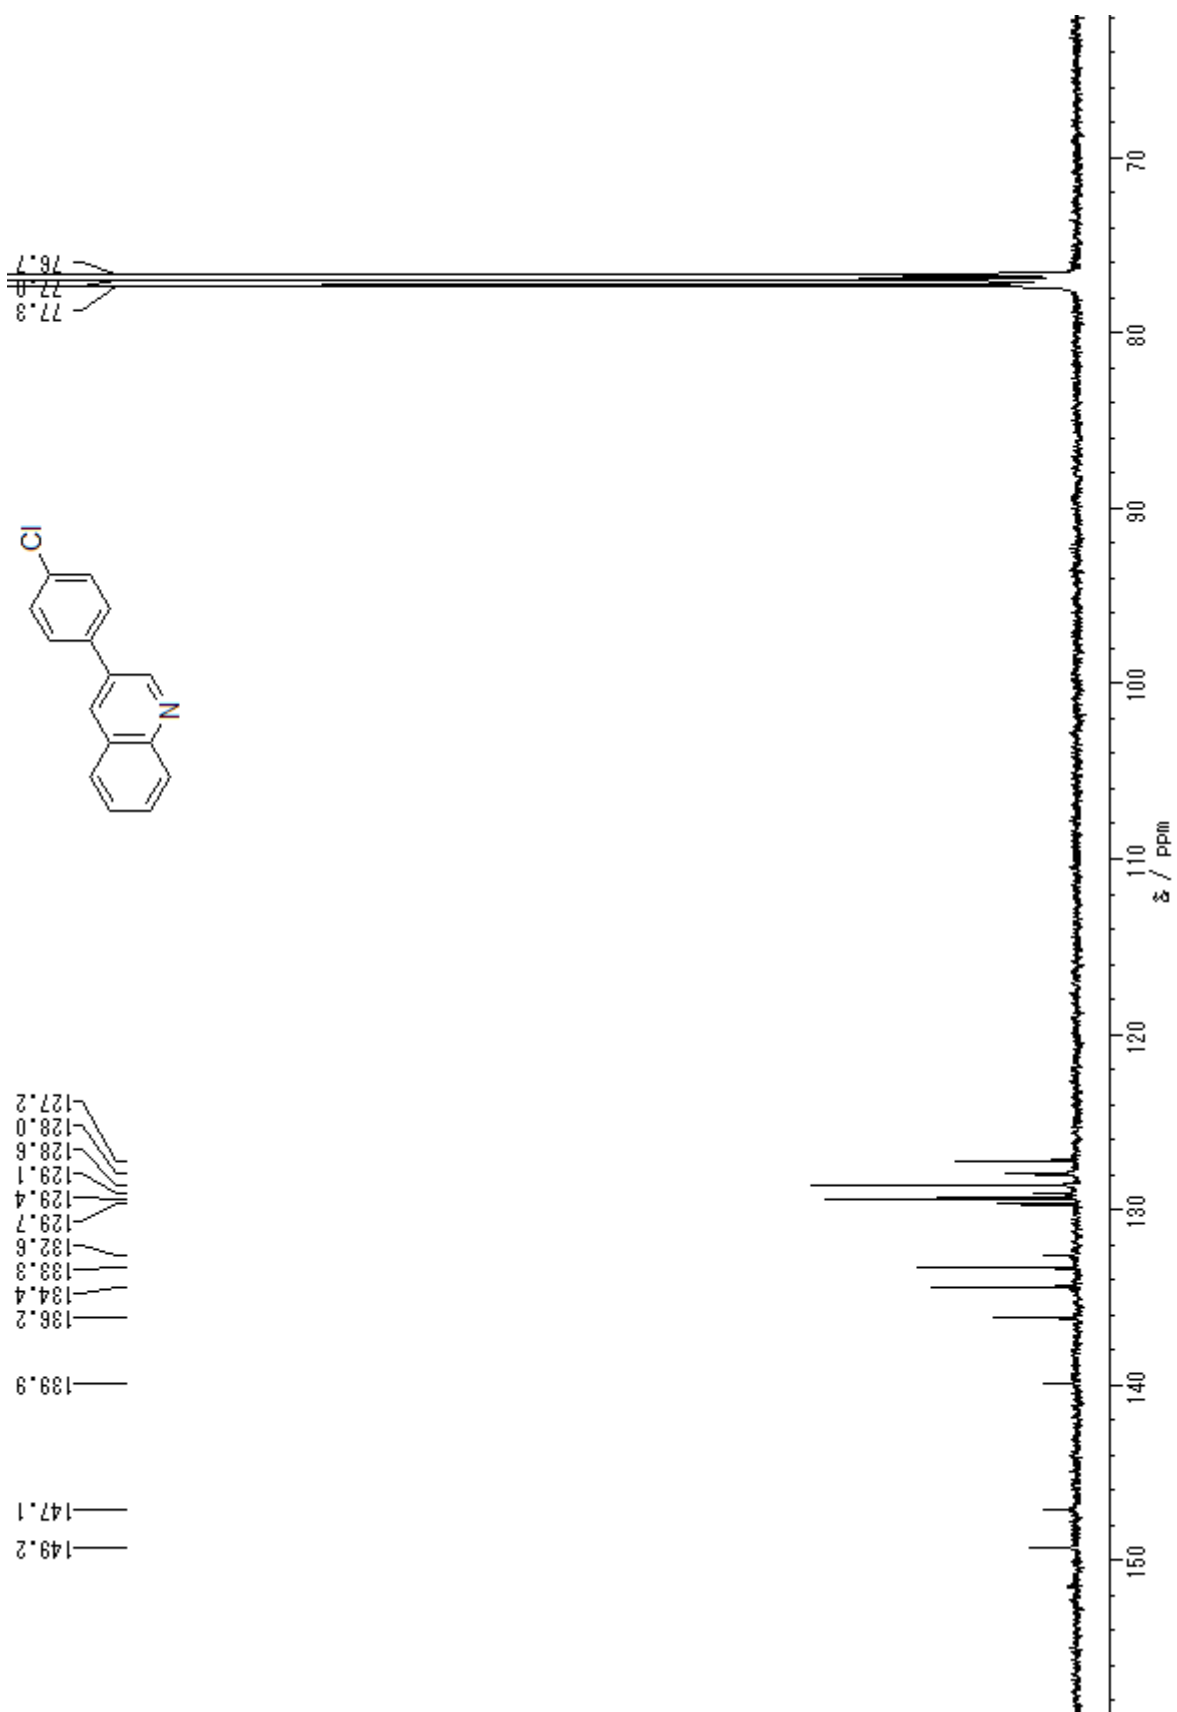

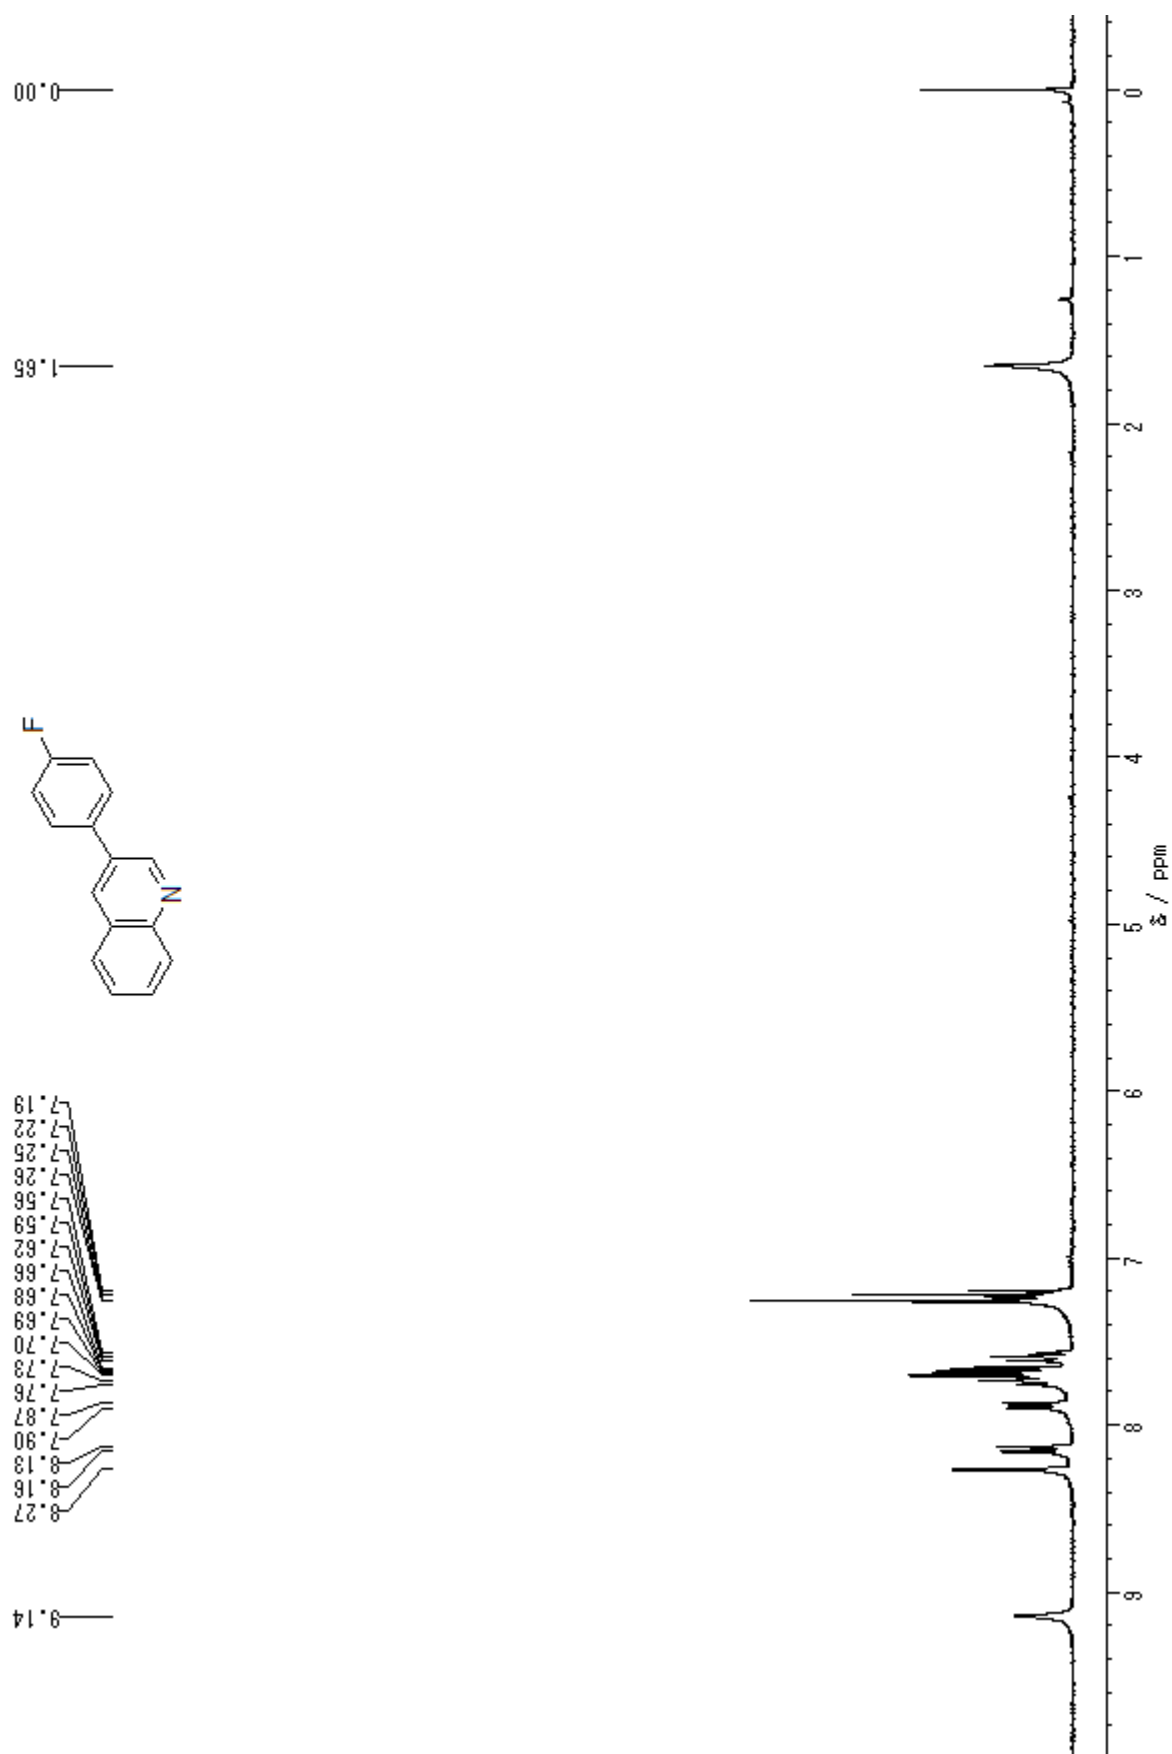

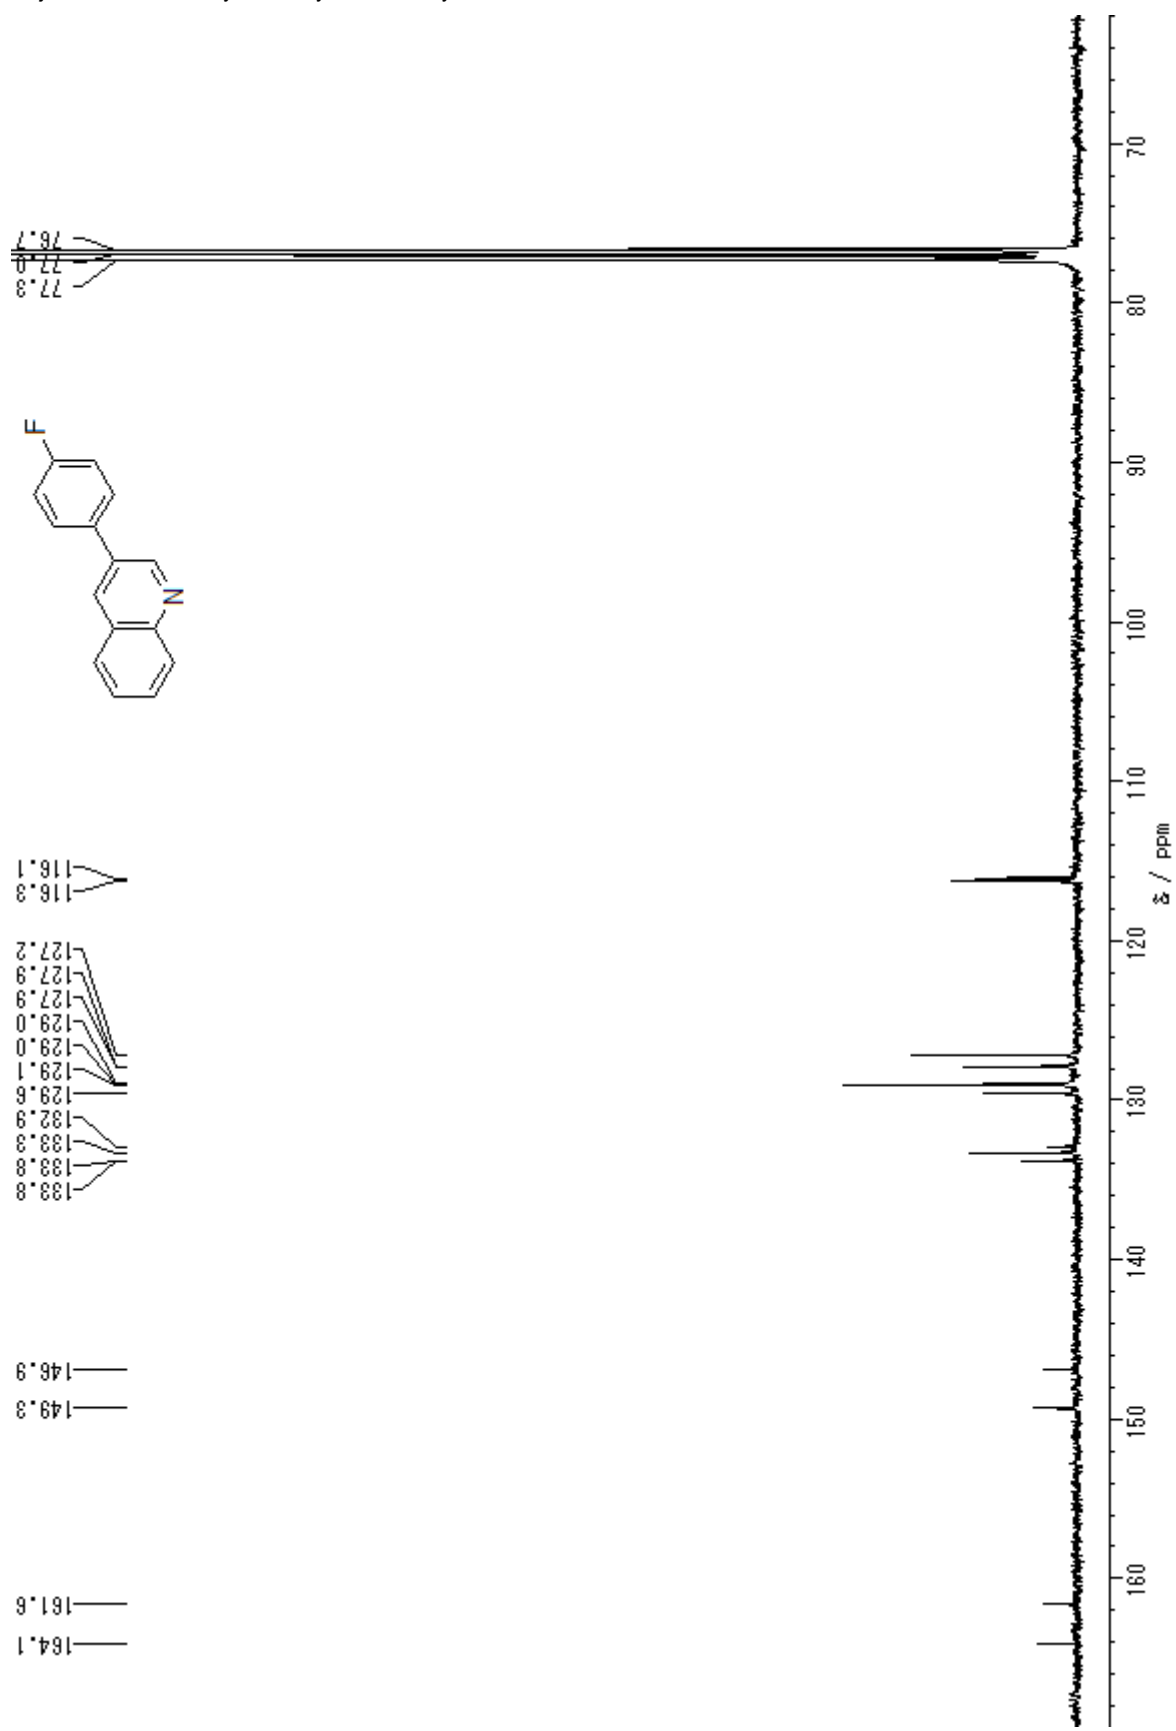

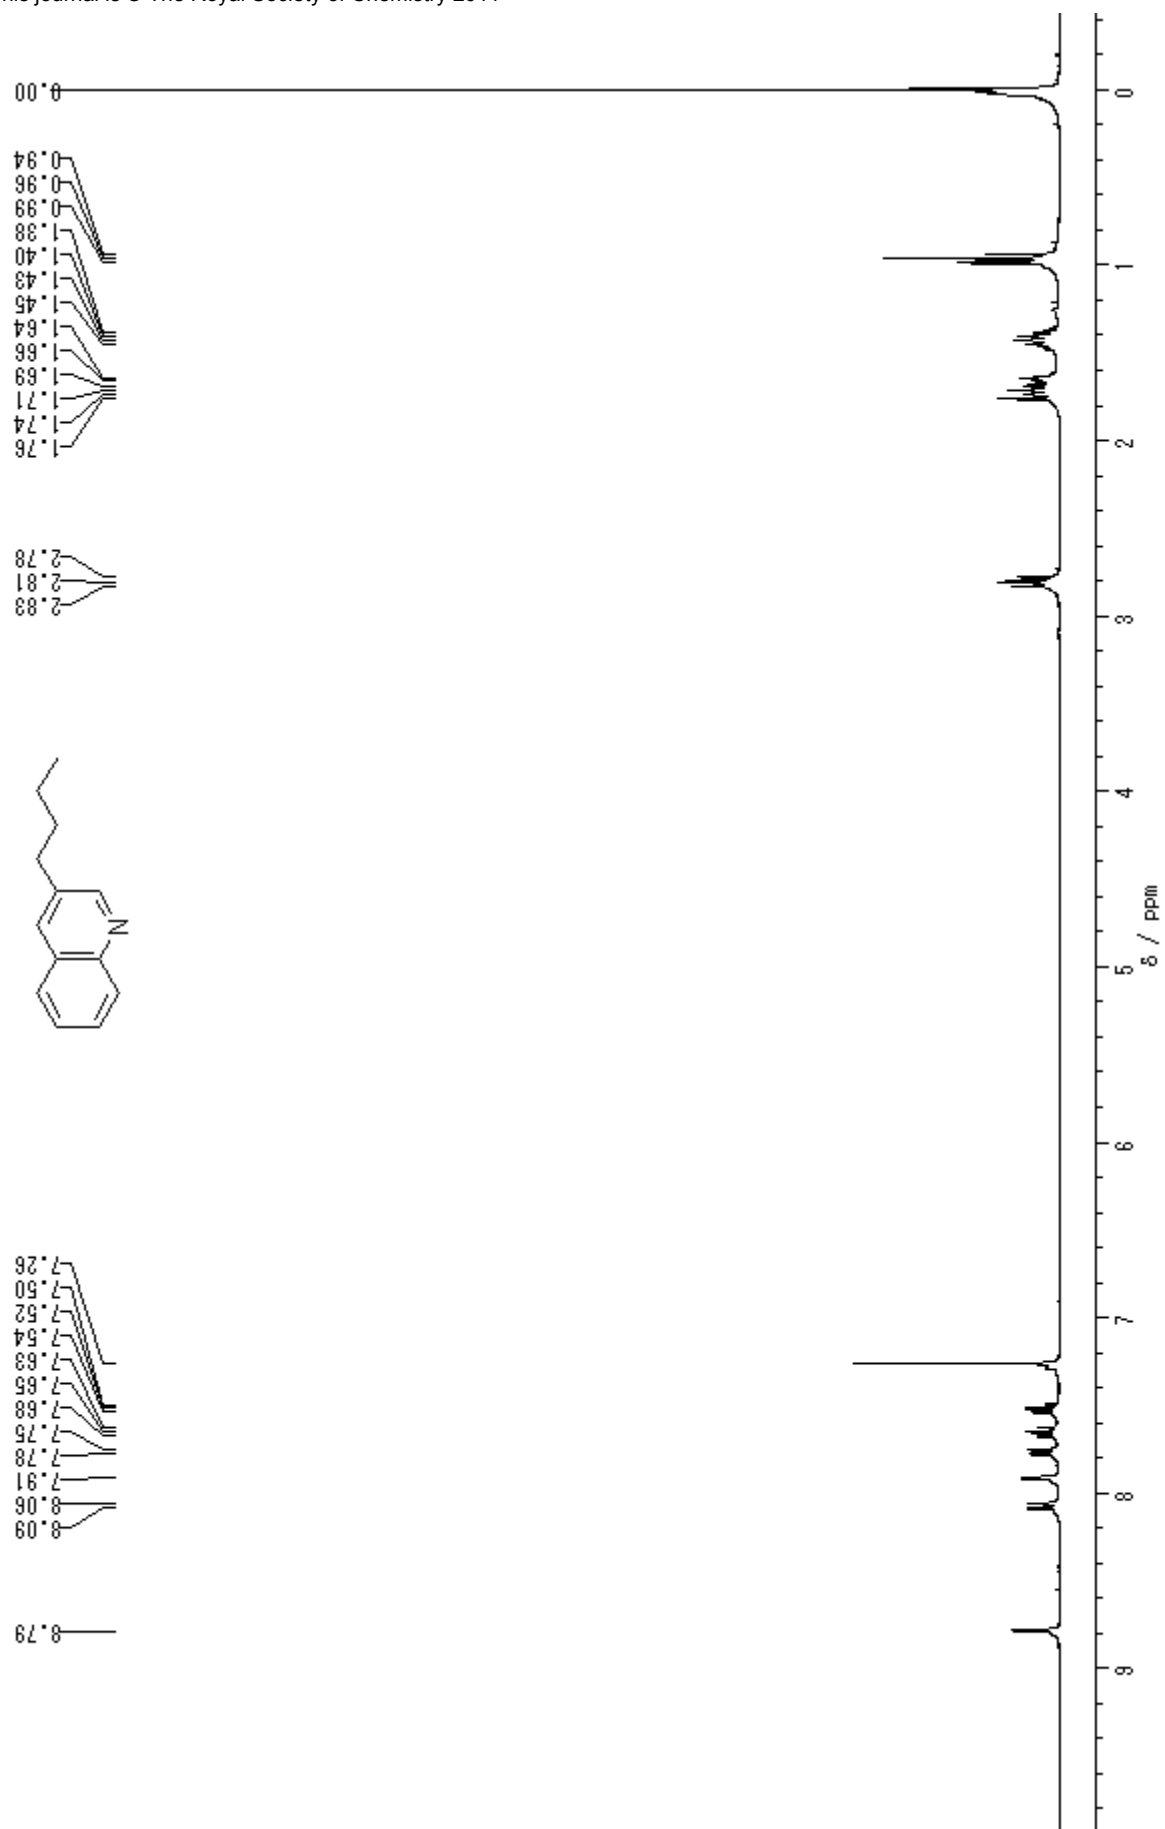

13.9

22.3

33.2  
32.9

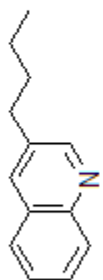

77.4  
77.0  
76.8

126.5  
127.3  
128.2  
128.5  
129.1  
134.1  
135.3

146.7

152.2

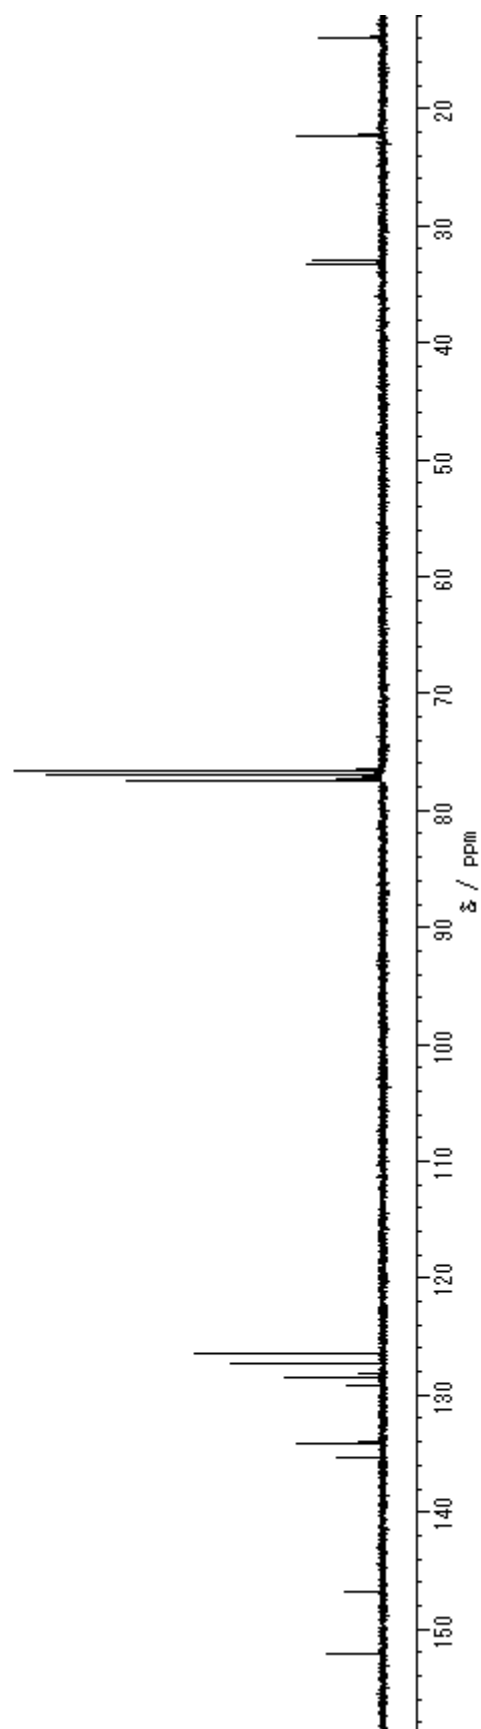

0.00  
1.68  
1.70  
1.72  
1.74  
1.76  
1.82  
1.84  
1.86  
1.88  
1.90  
2.28  
2.29  
2.30  
2.31  
2.51  
2.52

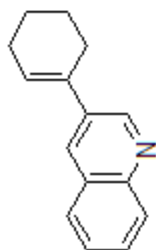

6.95  
6.96  
6.96  
6.97  
6.98  
7.26  
7.49  
7.51  
7.54  
7.62  
7.65  
7.67  
7.78  
7.80  
8.01  
8.05  
8.08

9.04

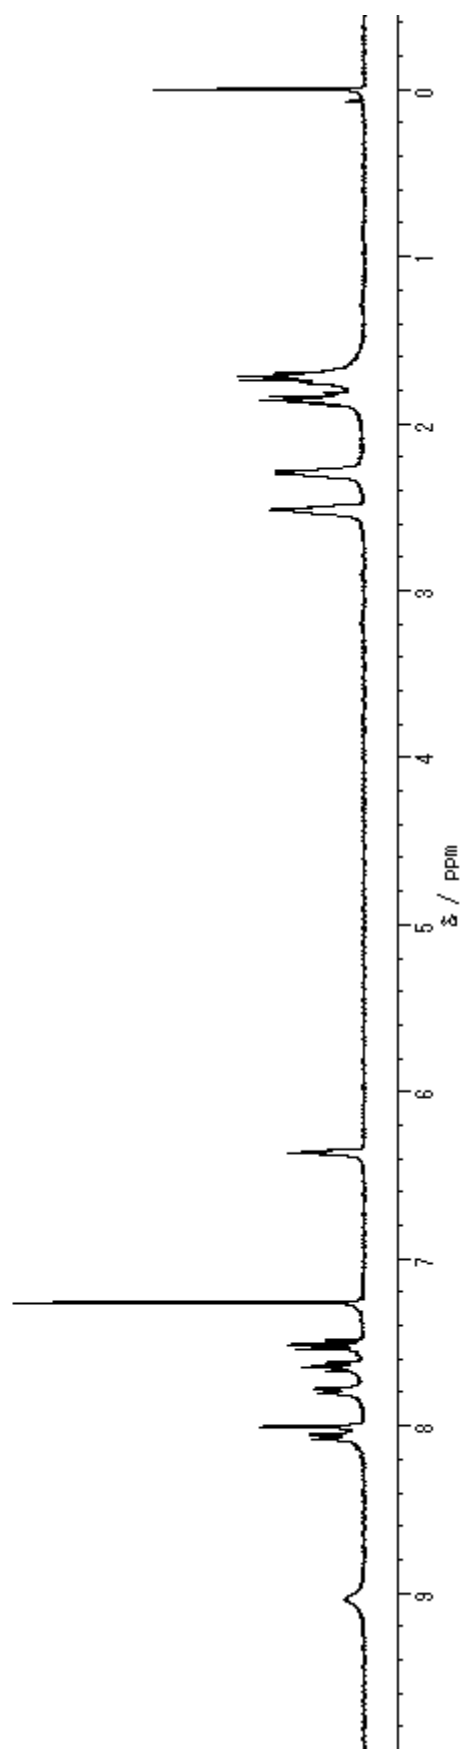

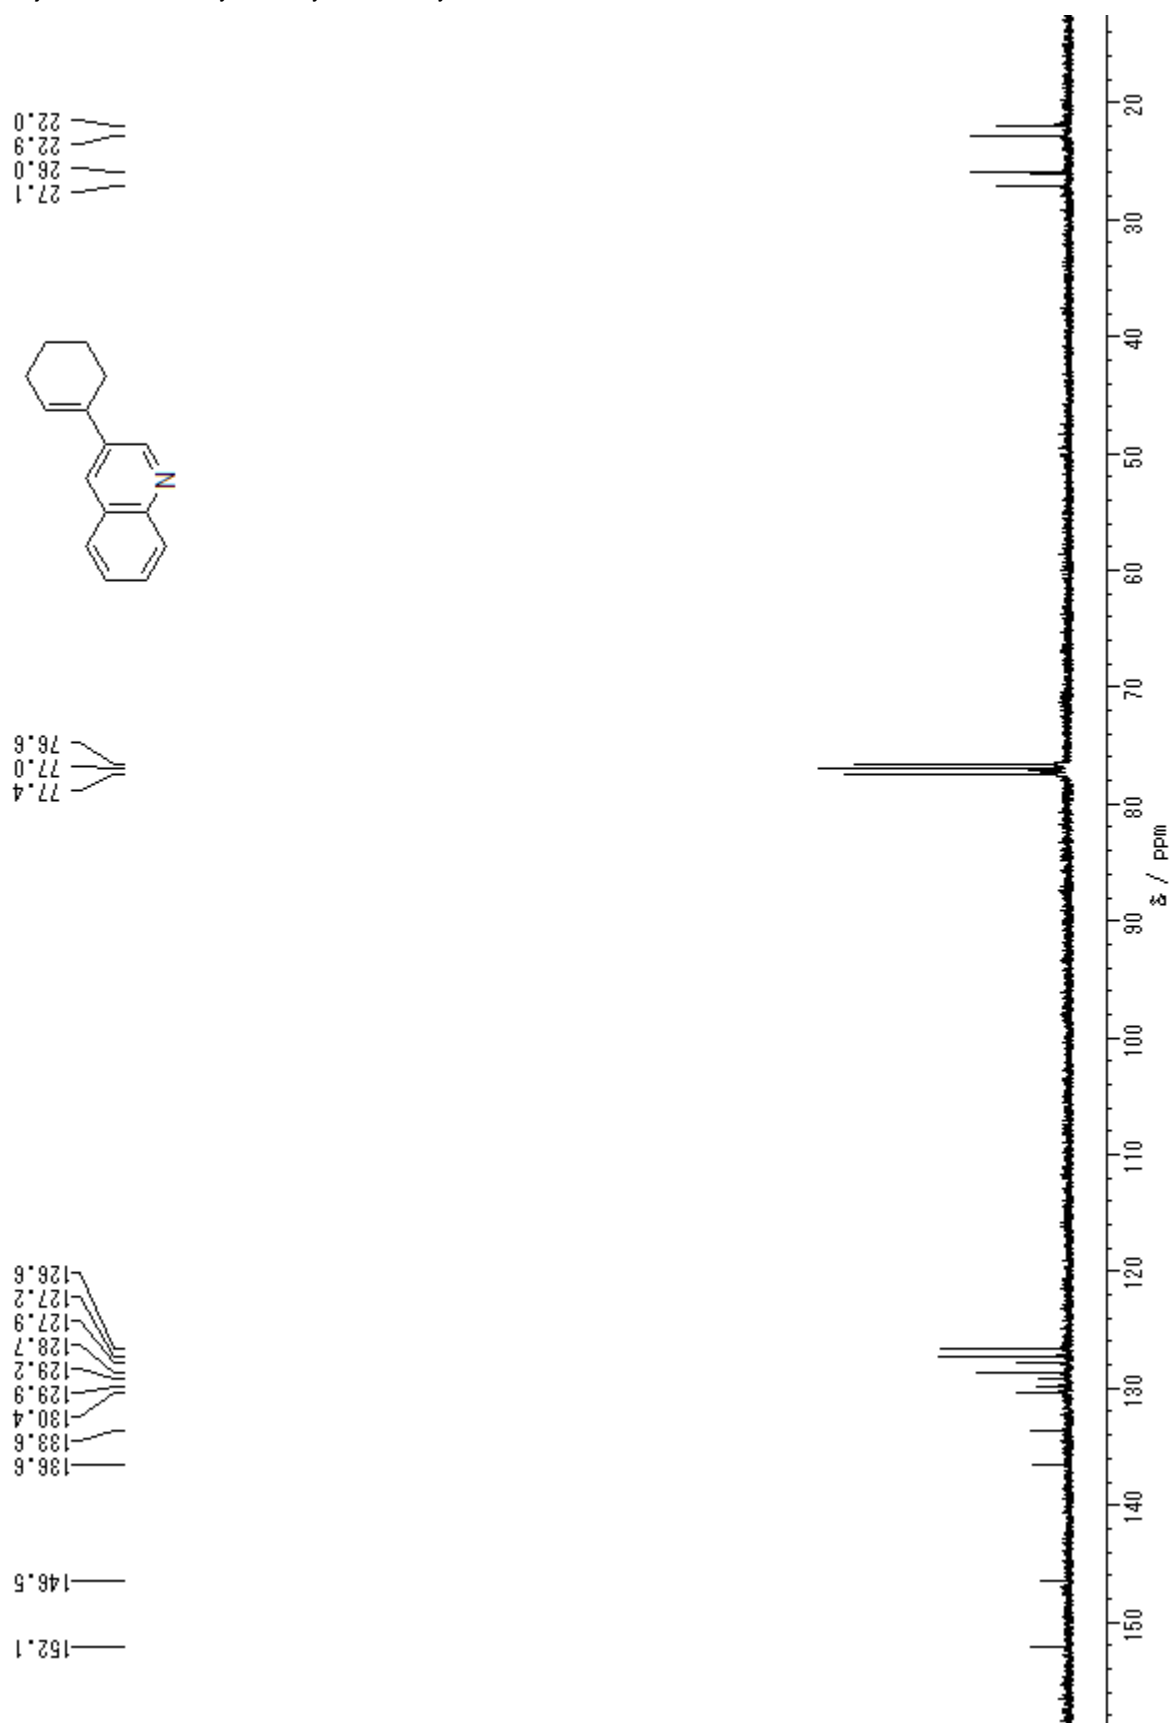

00'0

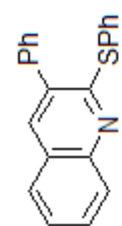

7.86  
7.76  
7.74  
7.73  
7.72  
7.57  
7.57  
7.56  
7.55  
7.55  
7.54  
7.50  
7.47  
7.45  
7.43  
7.40  
7.39  
7.38  
7.38  
7.37  
7.36  
7.25

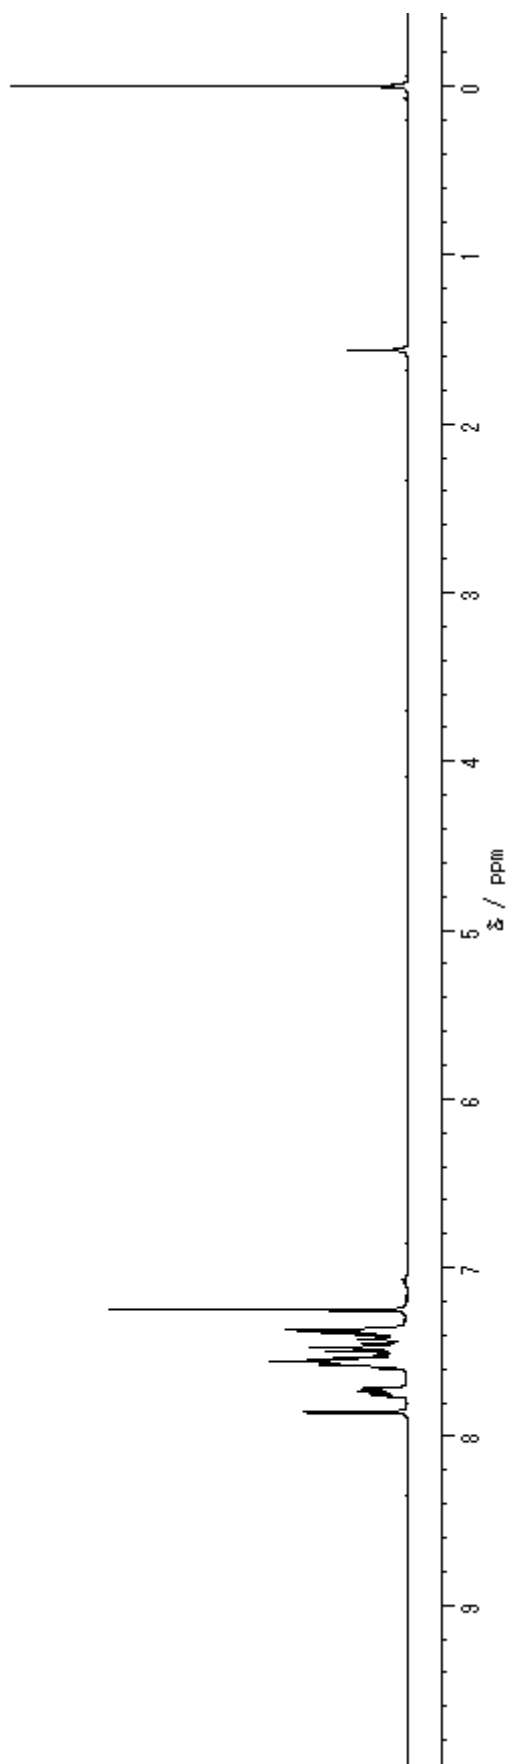



78.6  
77.0  
77.4

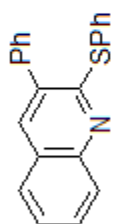

125.8  
126.3  
127.4  
128.3  
128.4  
128.4  
128.4  
128.7  
128.9  
129.4  
129.6  
129.6  
130.2  
131.1  
134.9  
135.7  
138.0

147.3

158.3

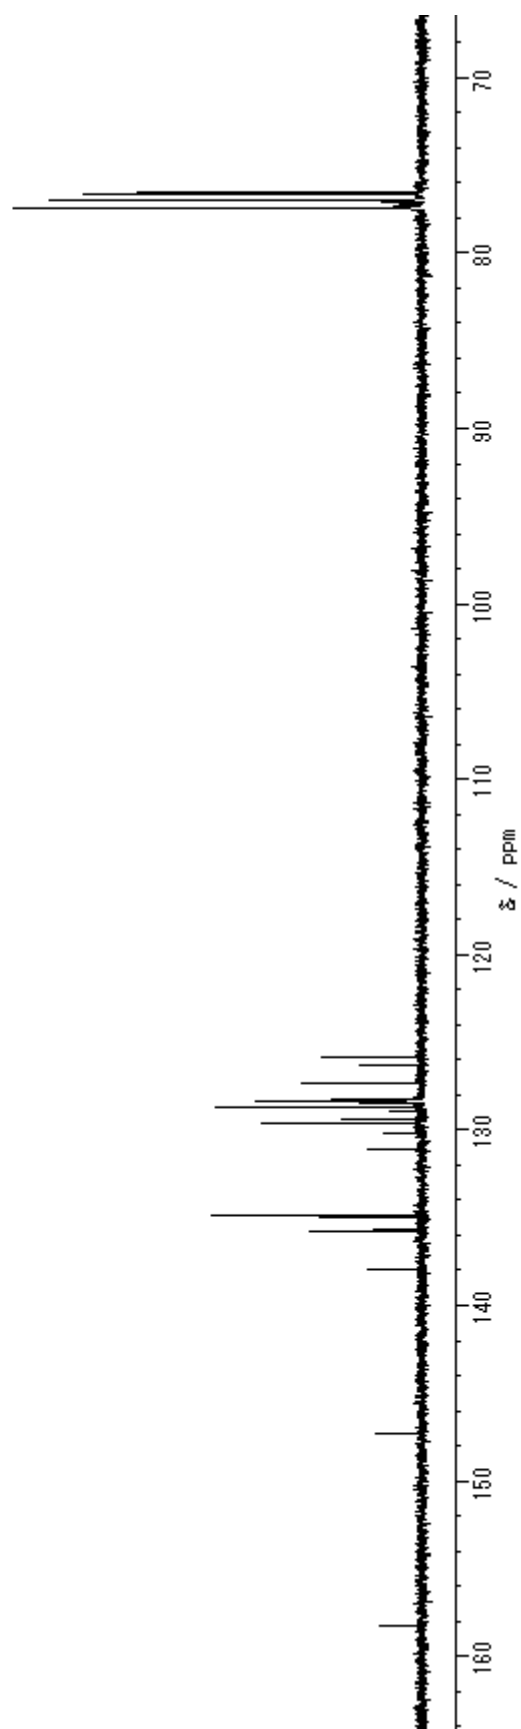

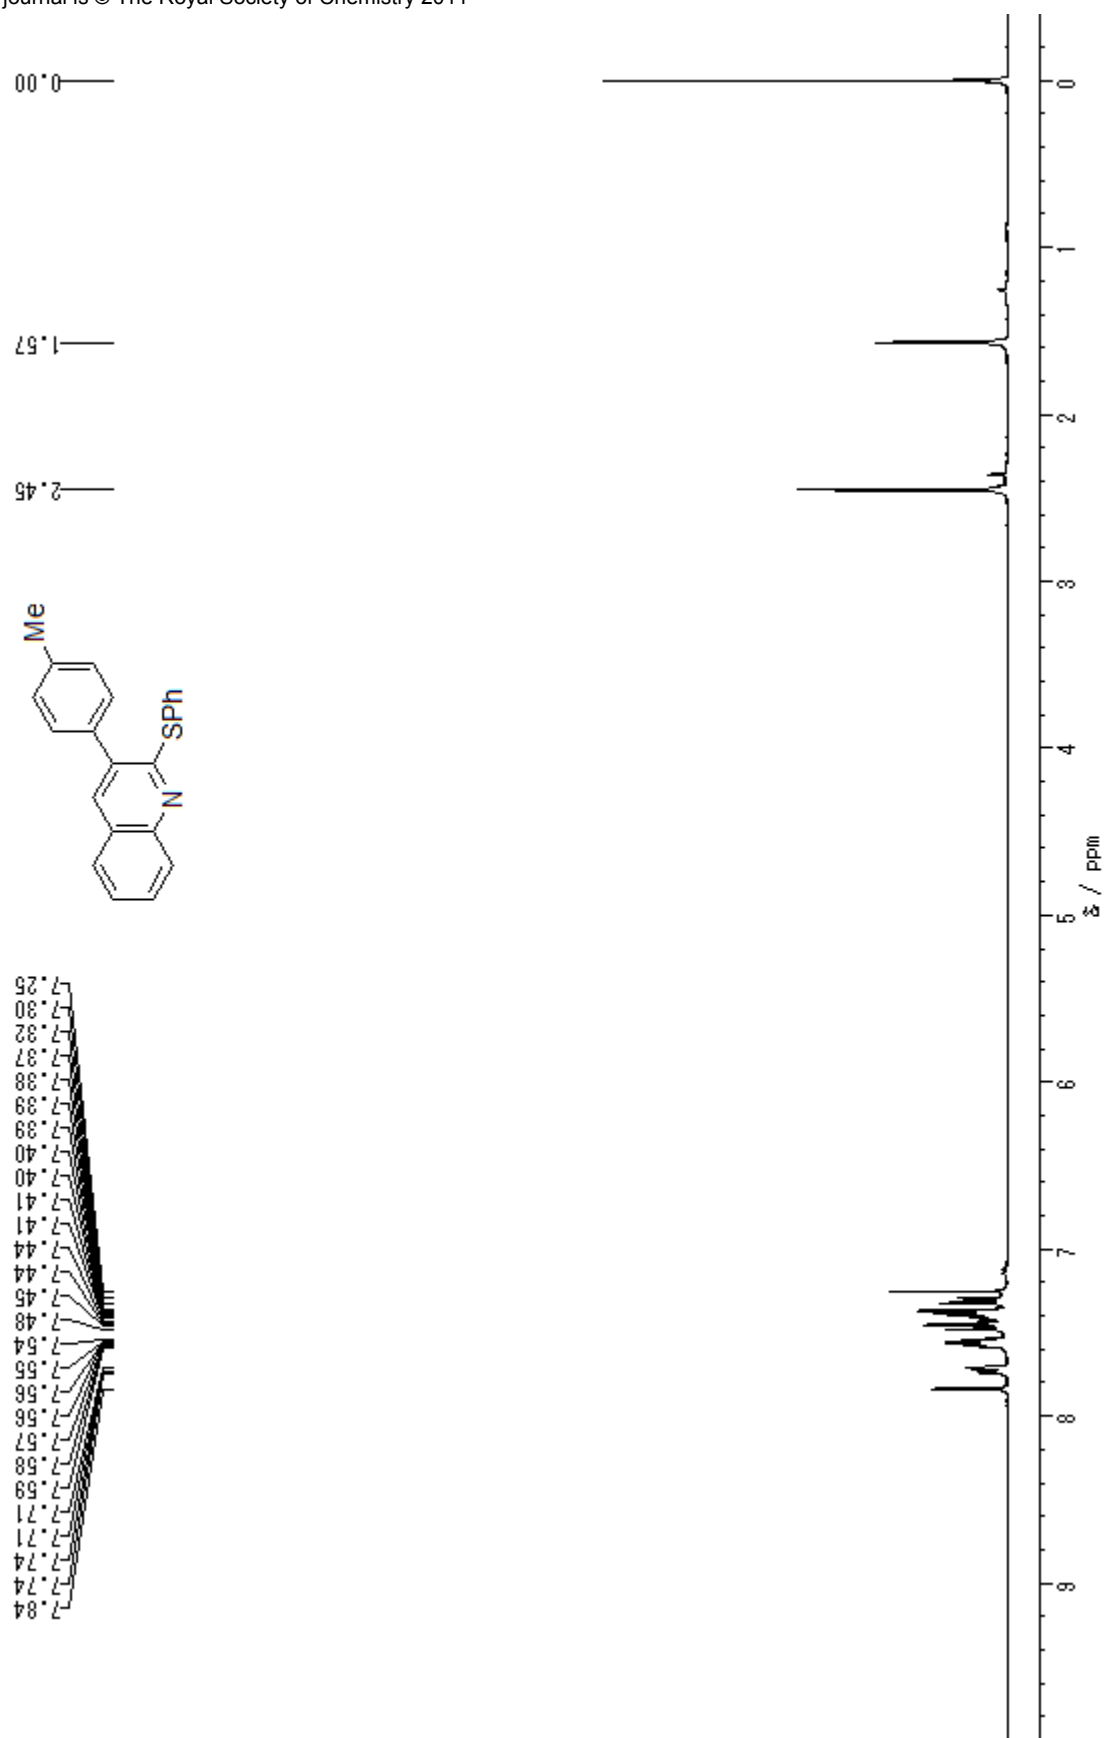

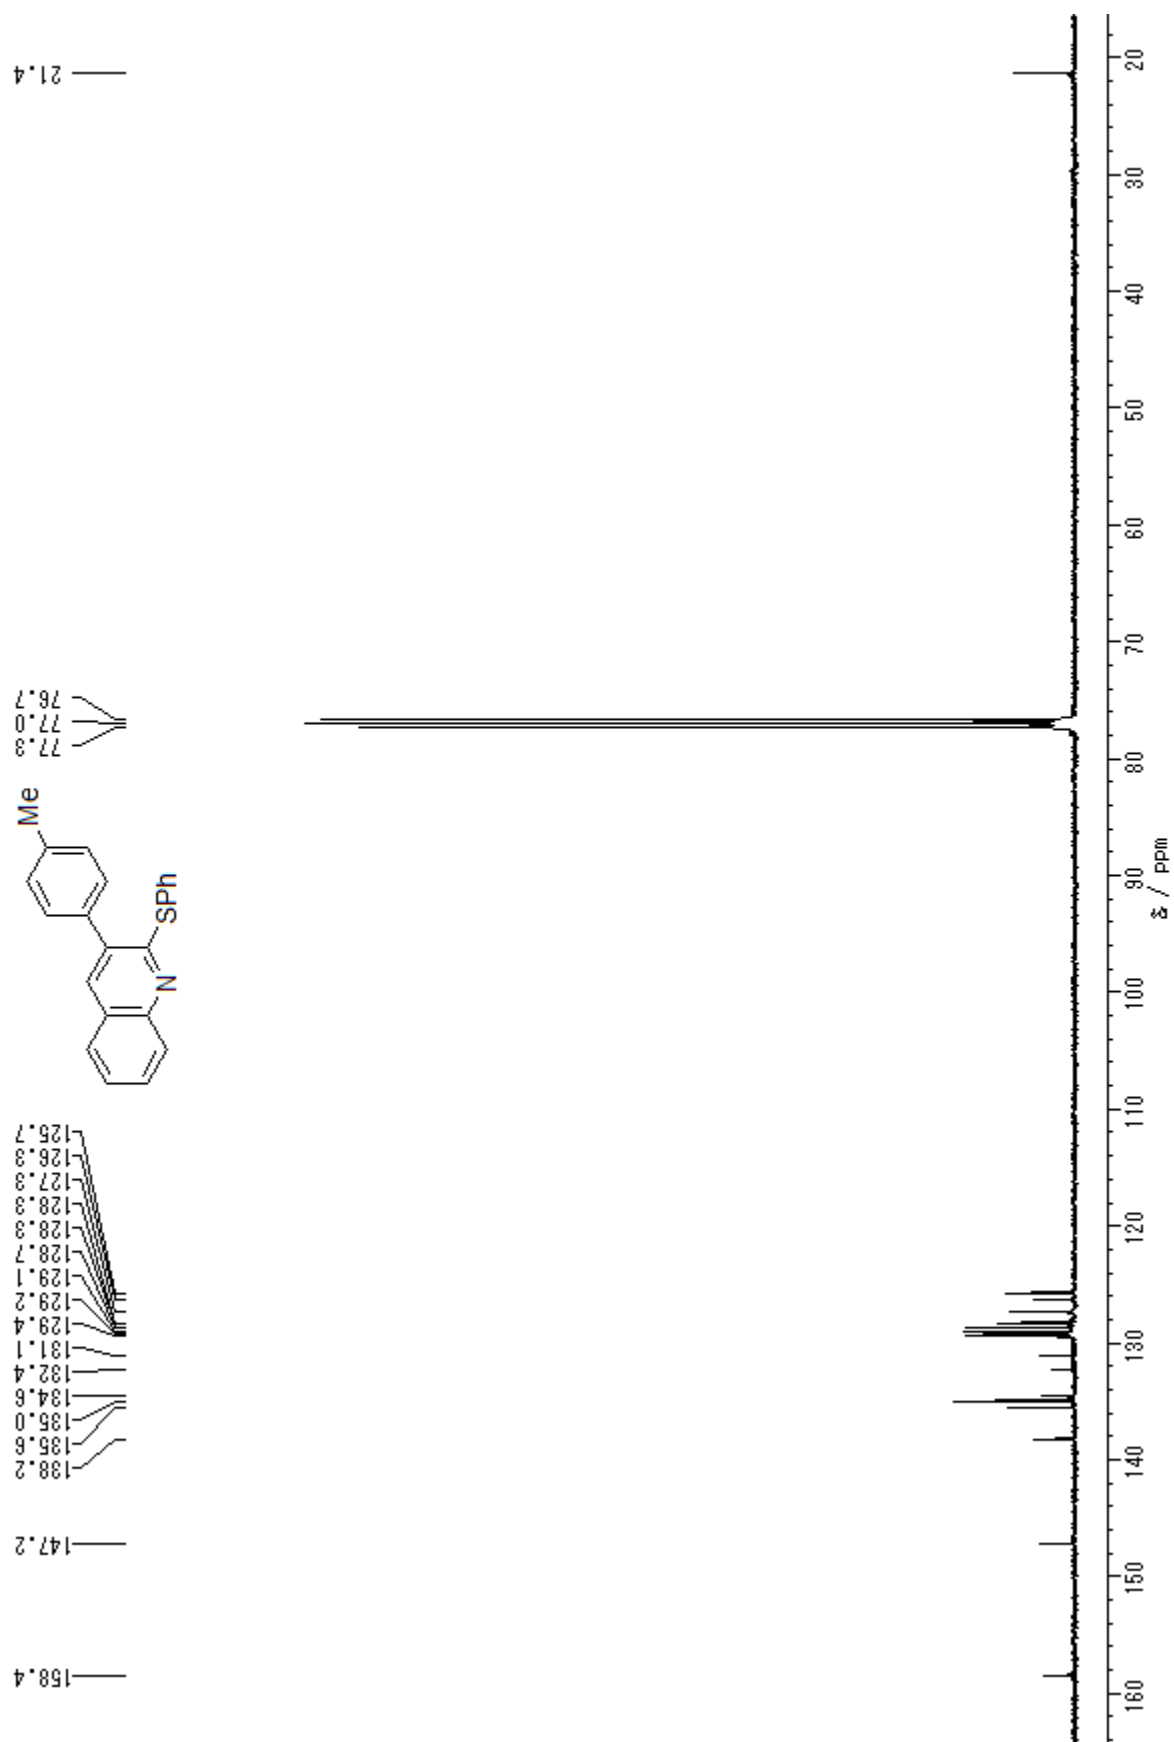

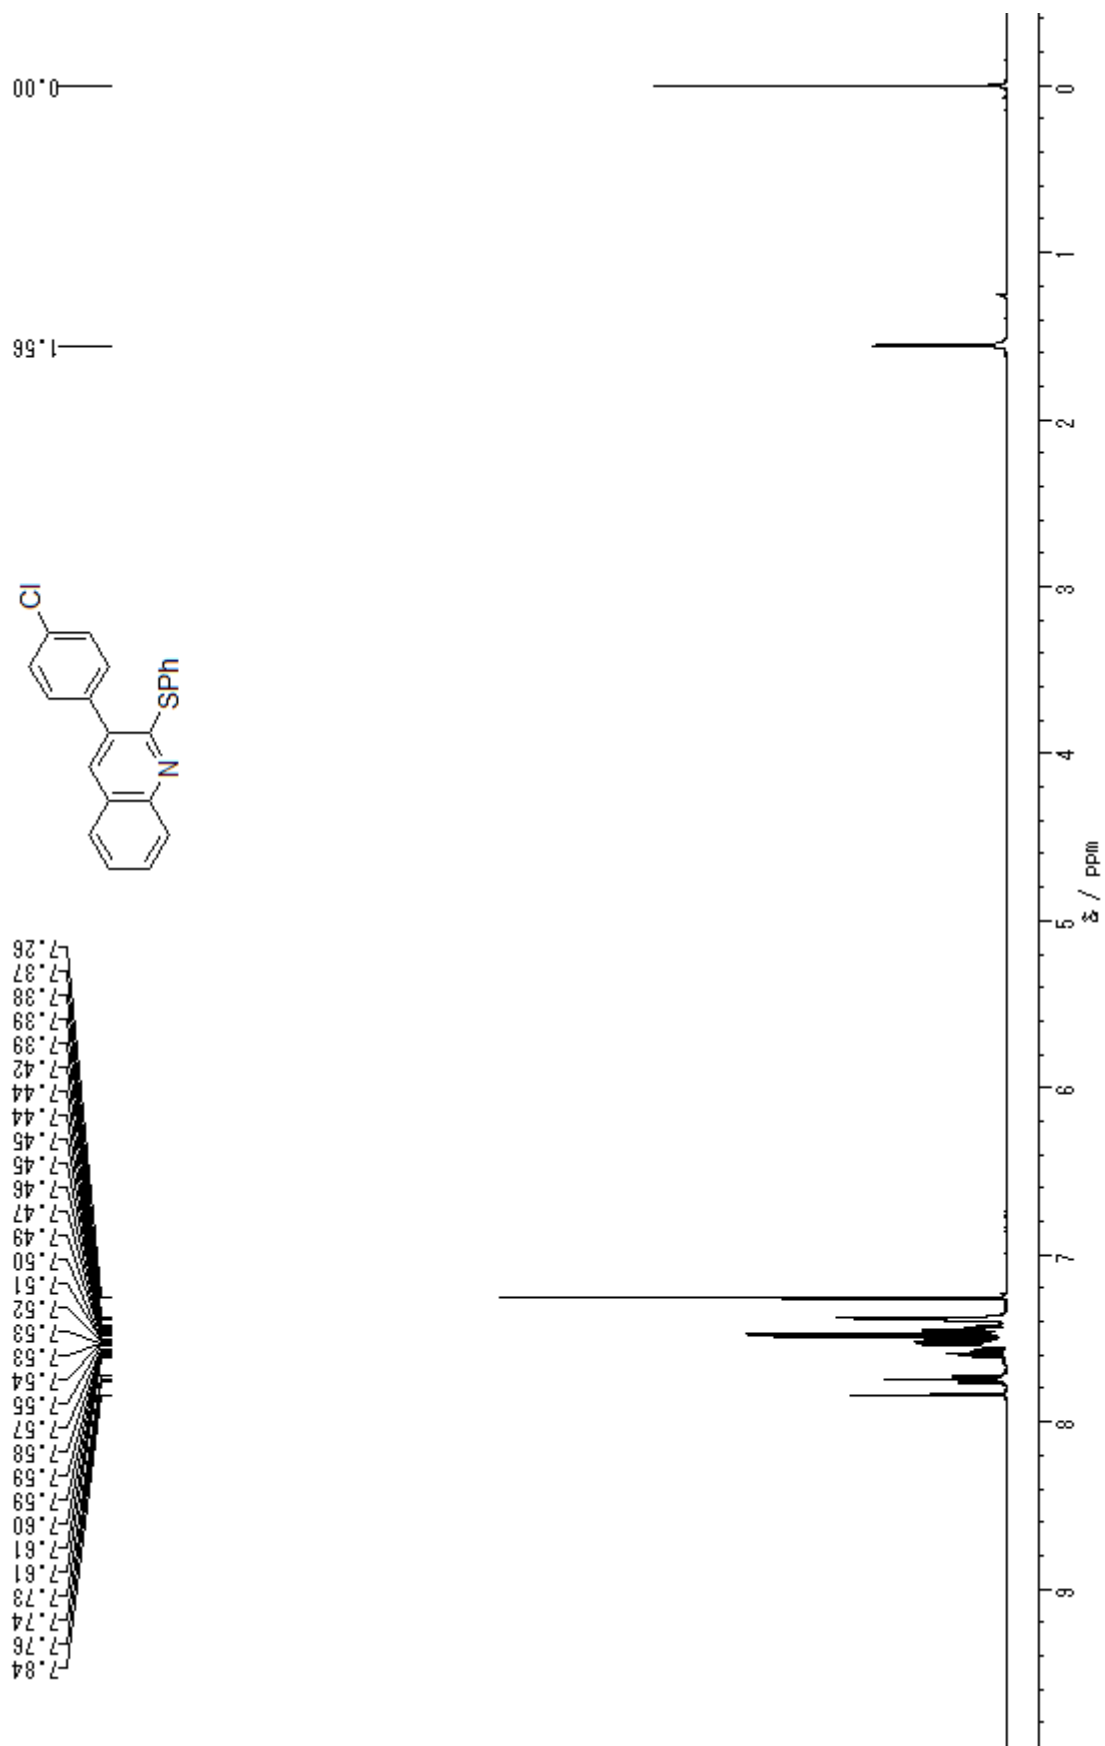

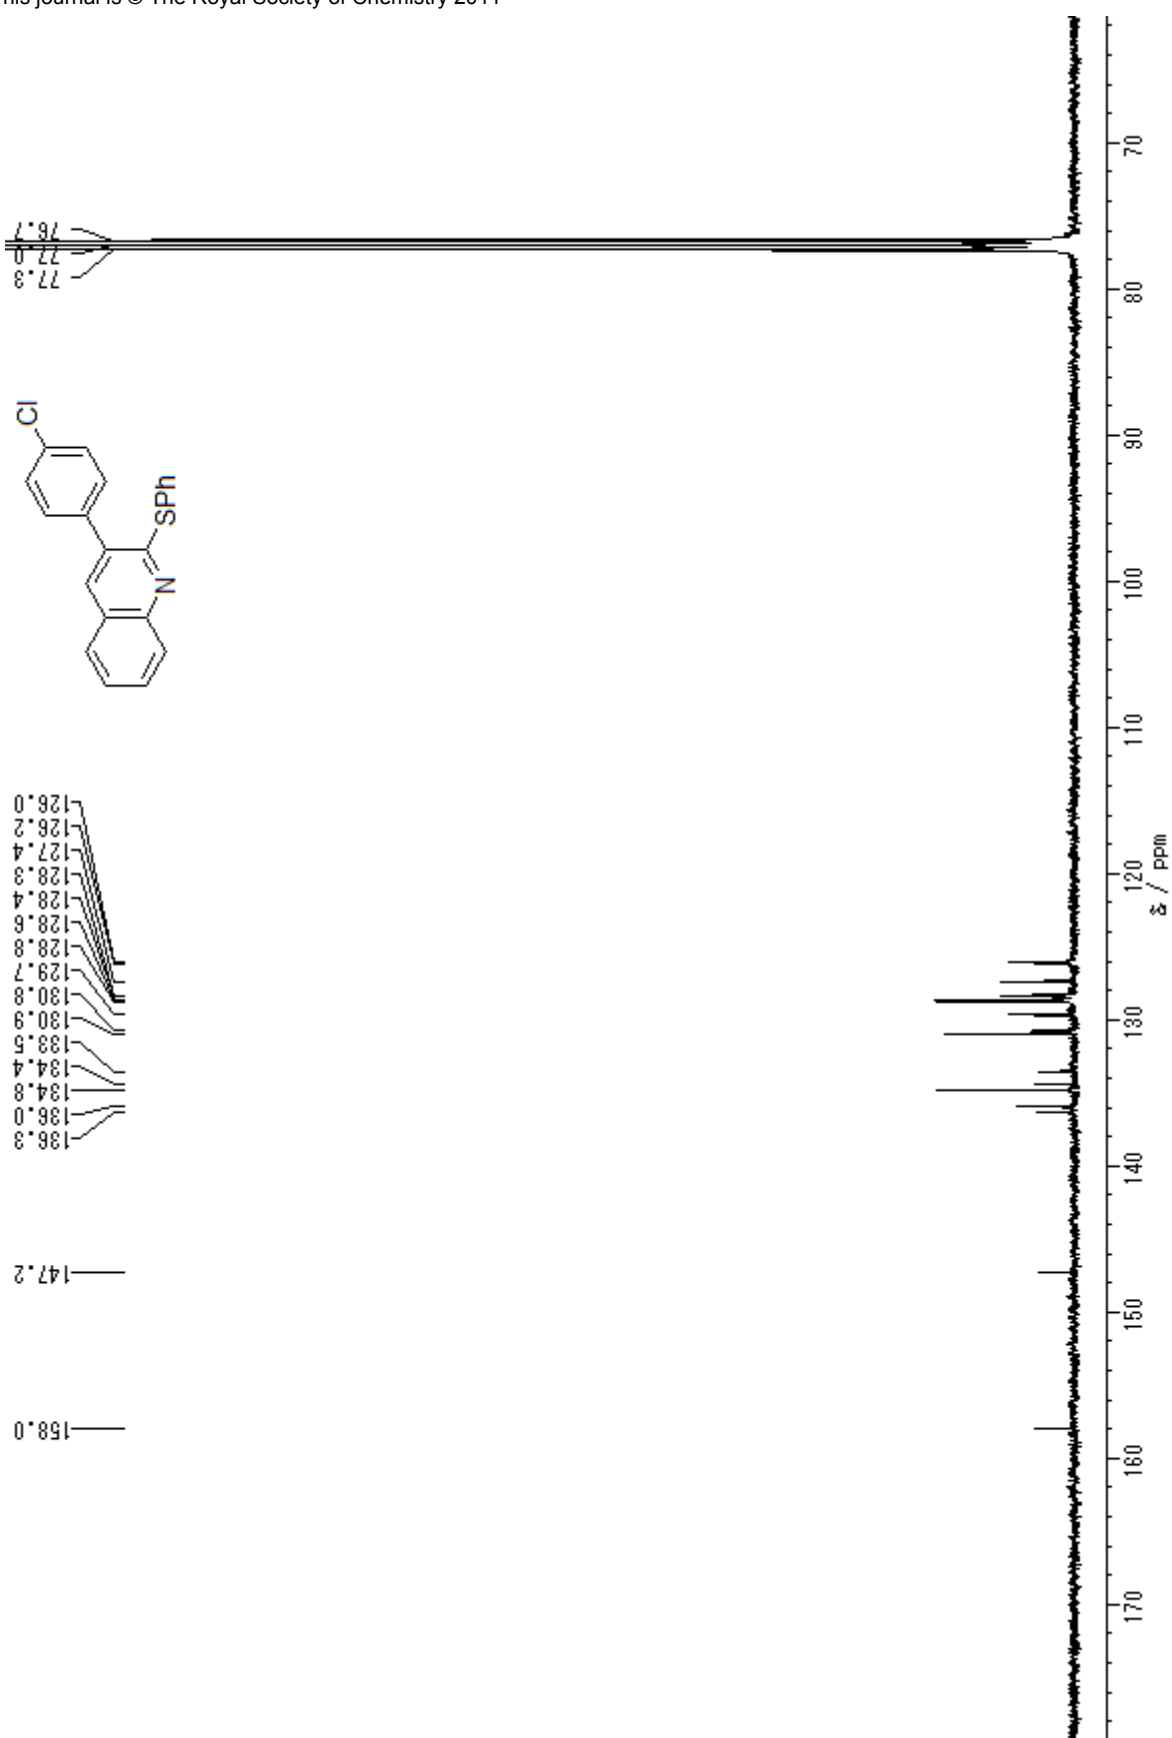

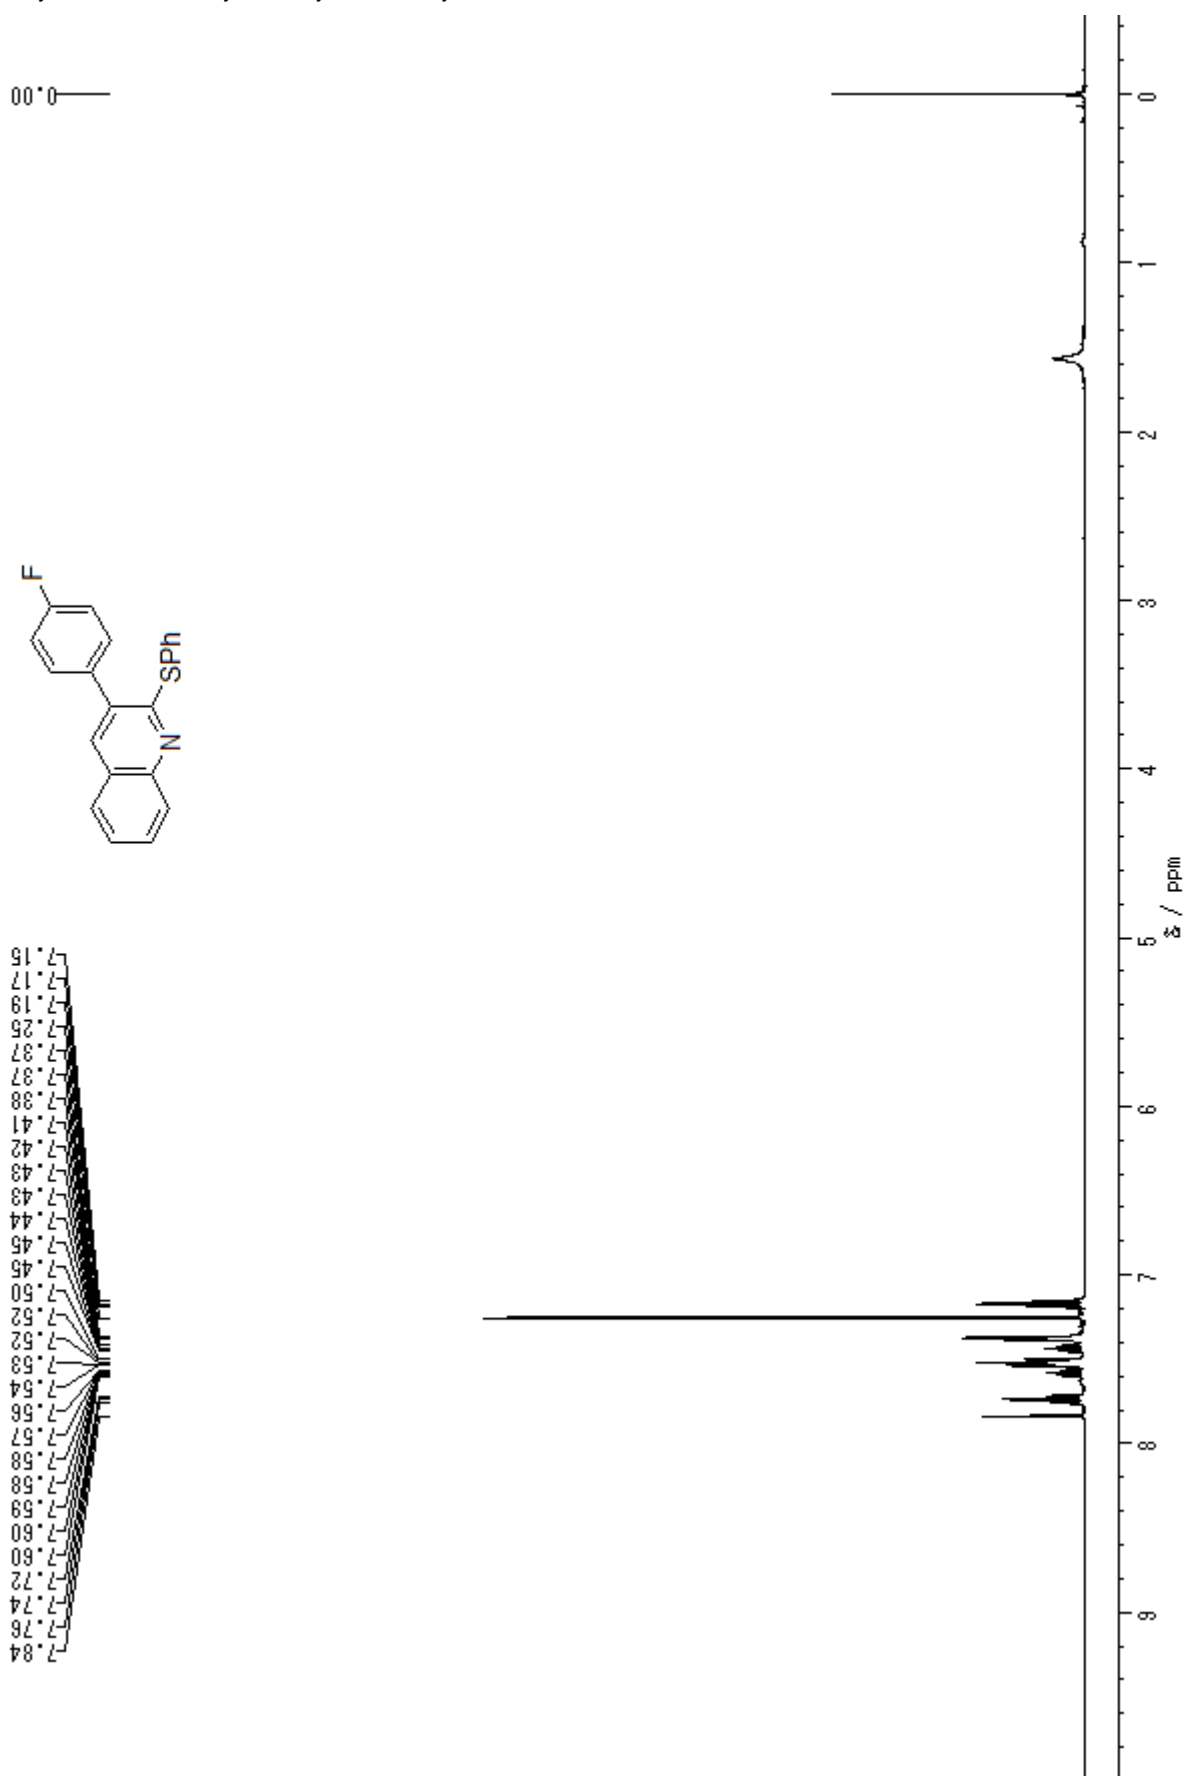

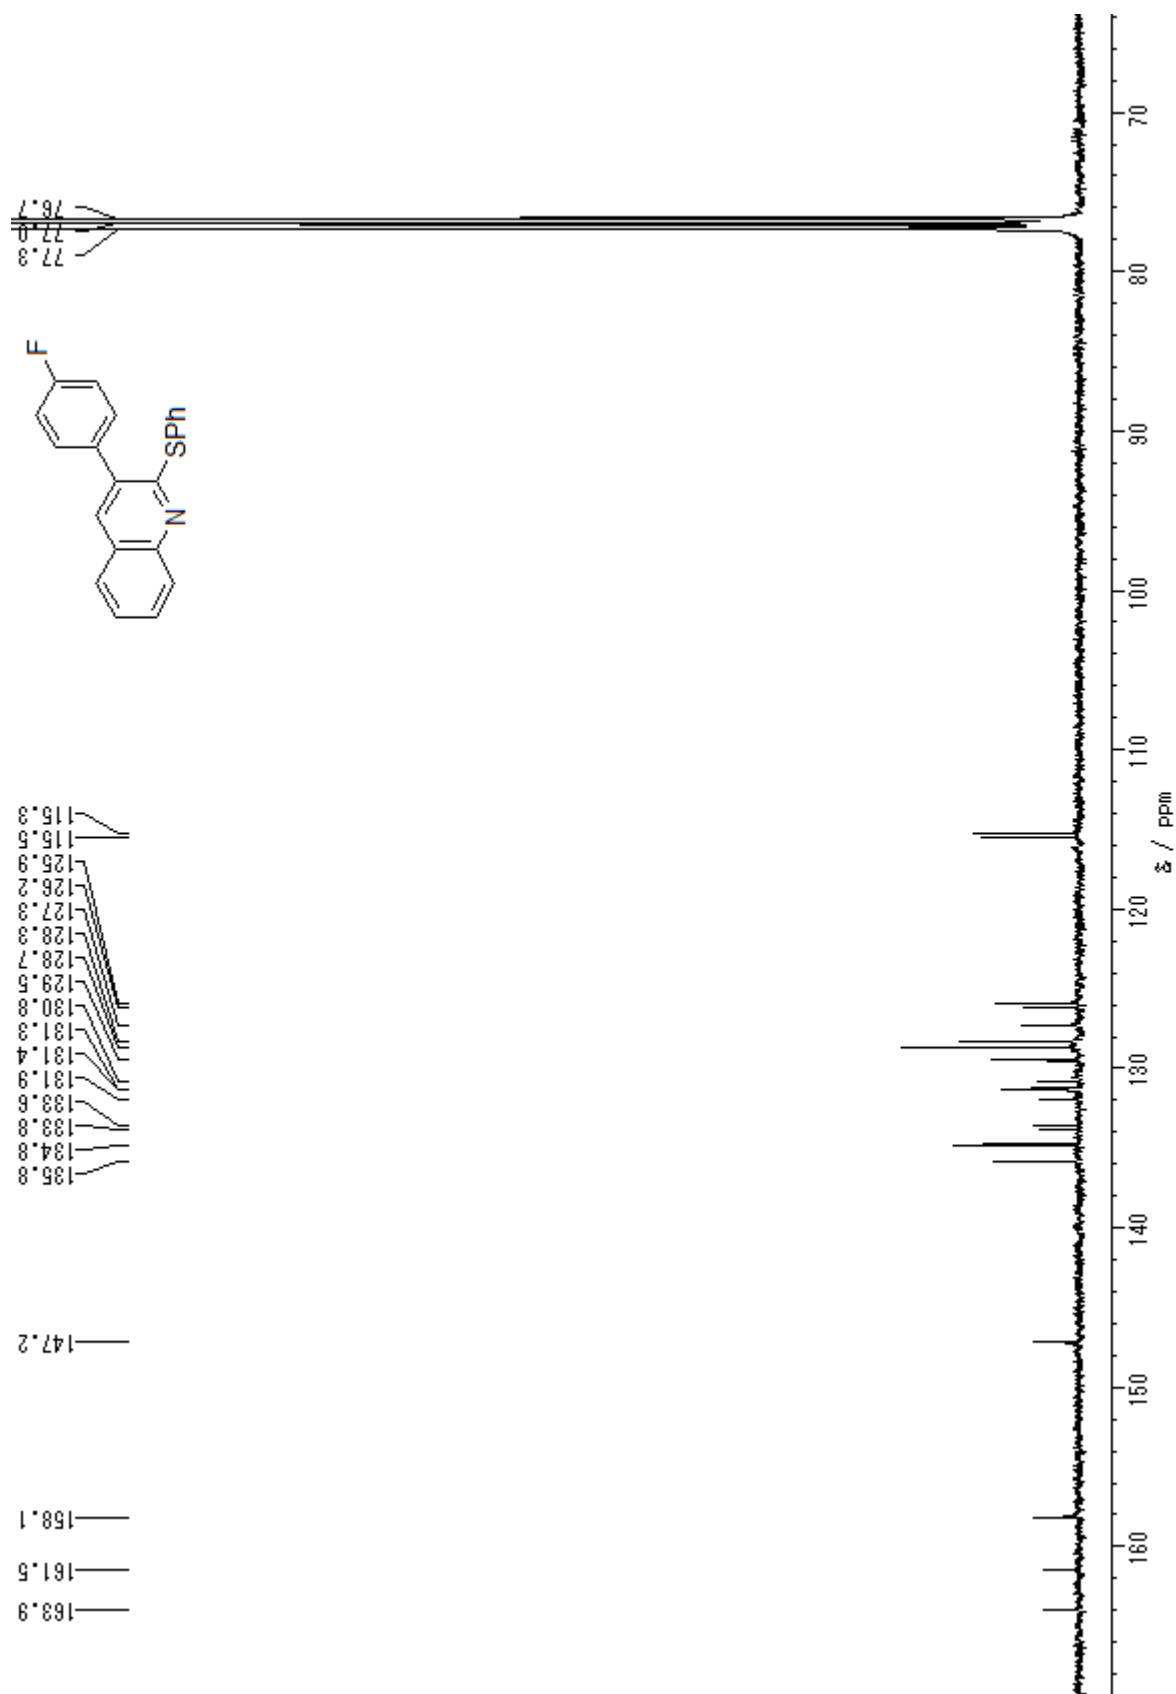

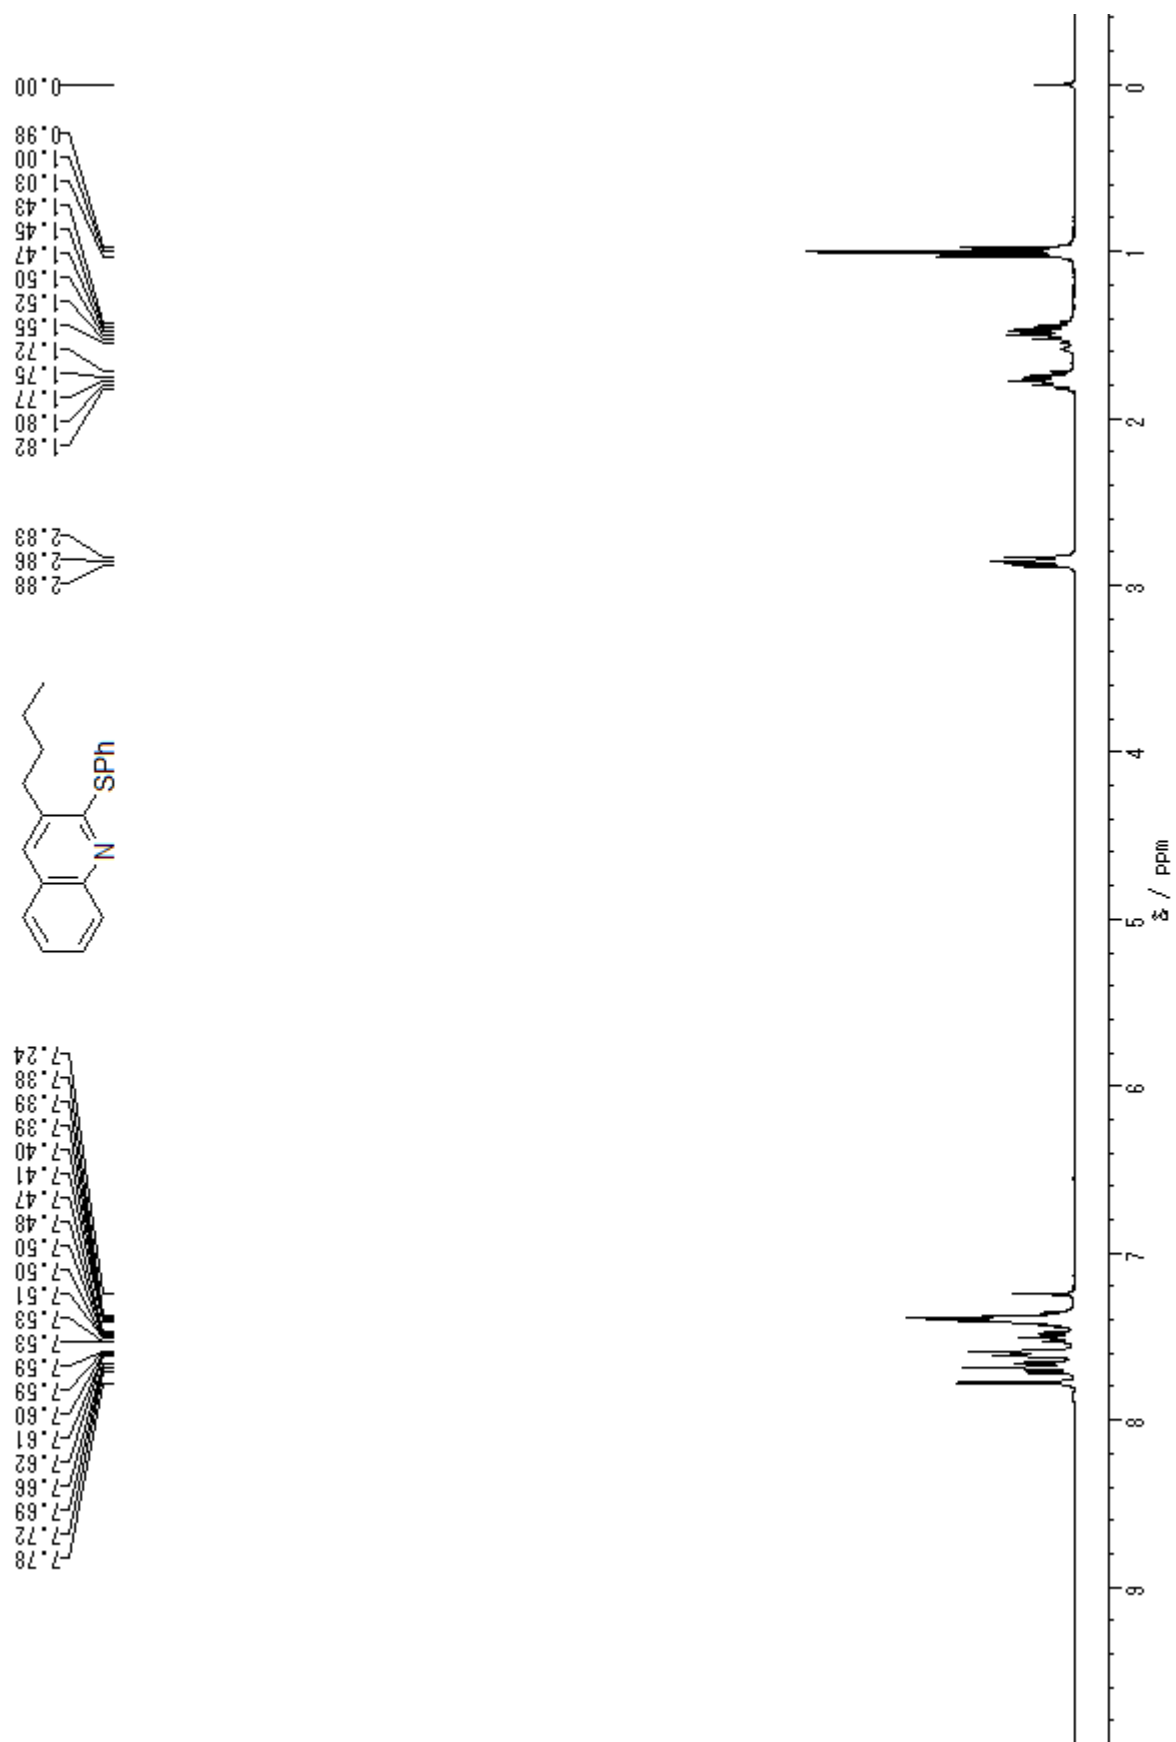



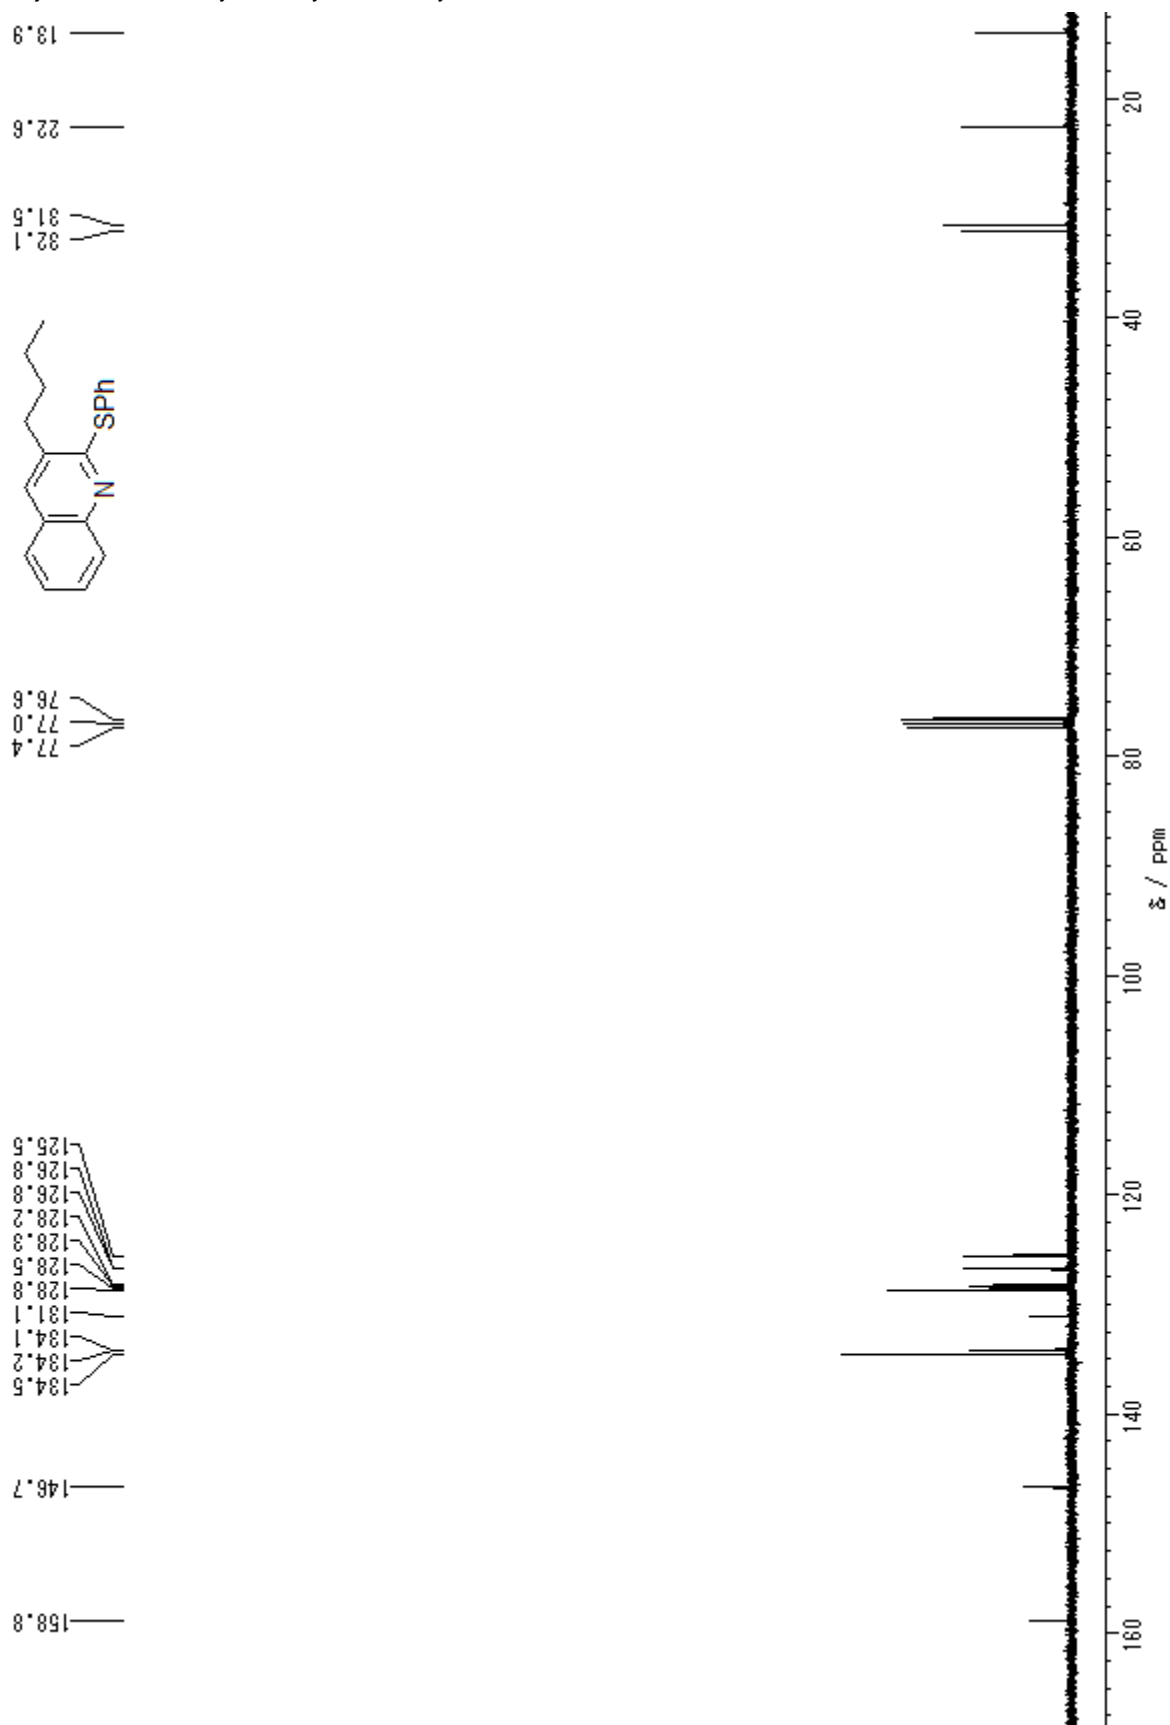

Supplement: c0ob01168a.pdf [file c0ob01168a.pdf]
